# Supplementary material for: Iridium-catalyzed asymmetric addition of imides to alkenes
Source: Royal Society of Chemistry journal article supplement (doi:10.1039/d3cc04406h), 2023-01-01

## Supplementary Information

### Iridium-catalysed asymmetric addition of imides to alkenes

Kentaro Yamakawa, Kana Sakamoto and Takahiro Nishimura\*

*Department of Chemistry, Graduate School of Science, Osaka Metropolitan University, Sumiyoshi,  
Osaka 558-8585, Japan.*

E-mail: tnishi@omu.ac.jp

#### Contents of Supplementary Information:

|                                                                                    |      |
|------------------------------------------------------------------------------------|------|
| 1. General                                                                         | S-2  |
| 2. Materials                                                                       | S-2  |
| 3. Procedure for Table S1                                                          | S-2  |
| 4. Procedure for Table 1                                                           | S-4  |
| 5. Procedure for Schemes 2 and 3                                                   | S-4  |
| 6. NMR experiments for the reaction of a cationic iridium complex with phthalimide | S-5  |
| 7. Reaction of phthalimide with styrene- <i>d</i> <sub>3</sub>                     | S-5  |
| 8. Characterization of the products                                                | S-6  |
| 9. References                                                                      | S-17 |
| 10. <sup>1</sup> H, <sup>13</sup> C NMR spectra and chiral HPLC charts             | S-18 |

## 1. General

All anaerobic and moisture-sensitive manipulations were carried out with standard Schlenk techniques under pre-dried nitrogen. NMR spectra were recorded on either a JEOL JNM ECZ-400 spectrometer (400 MHz for  $^1\text{H}$ , 100 MHz for  $^{13}\text{C}$ ) or a Bruker Avance III HD 400 spectrometer (400 MHz for  $^1\text{H}$ , 100 MHz for  $^{13}\text{C}$ , 162 MHz for  $^{31}\text{P}$ ). Chemical shifts are reported in  $\delta$  (ppm) referenced to the residual peaks of  $\text{CDCl}_3$  ( $\delta$  7.26) and  $\text{CD}_3\text{CN}$  ( $\delta$  1.93) for  $^1\text{H}$  NMR, and  $\text{CDCl}_3$  ( $\delta$  77.00) for  $^{13}\text{C}$  NMR. The following abbreviations are used; s: singlet, d: doublet, t: triplet, q: quartet, quint: quintet, sext: sextet, sept: septet, m: multiplet, br: broad. Optical rotations were measured on a JASCO P-2200 polarimeter. High-resolution mass spectra were obtained with JEOL AccuTOF LC-plus 4G spectrometer. Flash column chromatography was performed with Silica Gel 60 N (Wako). Preparative thin-layer chromatography was performed with Wakogel® B-5F (Wako). Preparative recycling gel permeation chromatography (GPC) was performed using Shodex GPC FP-2002 (x 2) using chloroform as eluent.

## 2. Materials

Dehydrated solvents were purchased and used after being deoxygenated by bubbling  $\text{N}_2$ .  $[\text{IrCl}(\text{cod})]_2$ ,<sup>1</sup>  $[\text{IrCl}(\text{coe})_2]_2$ ,<sup>2</sup> and  $\text{NaBAr}^{\text{F}}_4$  [ $\text{Ar}^{\text{F}} = 3,5\text{-(CF}_3)_2\text{C}_6\text{H}_3$ ]<sup>3</sup> were prepared according to the reported procedures. Ligands (*R*)-DTBM-segphos, (*S*)-DTBM-segphos, (*S*)-segphos, (*R*)-DTBM-binap, (*R*)-binap, and (*S*)-DTBM-MeO-biphep were purchased from commercial suppliers and used as received. Imides **1b**,<sup>4</sup> **1c**,<sup>5</sup> and **1d**<sup>6</sup> were prepared according to the reported procedures. Alkenes **2a**, **2b**, **2e**, **2g**, **2h**, **2i**, **2j**, **2l**, **2q**, and **2t** were purchased from commercial suppliers and used after vacuum distillation. Known alkenes **2c**, **2d**, **2f**, **2k**, **2m**, **2n**, **2o**, and **2p** were prepared from the corresponding aldehydes with methyltriphenylphosphonium bromide and potassium *t*-butoxide in  $\text{Et}_2\text{O}$ . Allylsilanes **2r** and **2s** were prepared according to the reported procedures.<sup>7</sup> Other chemicals were purchased from commercial suppliers and used as received. Racemic compounds of **3** were synthesized by using pseudo racemic DTBM-segphos, which was prepared from an equivalent amount of (*R*)- and (*S*)-DTBM-segphos.

## 3. Procedure for Table S1

A mixture of  $[\text{IrCl}(\text{cod})]_2$  (1.7 mg, 0.0025 mmol, 5 mol% Ir), (*R*)-DTBM-segphos (7.1 mg, 0.0060 mmol, 6 mol%), and  $\text{NaBAr}^{\text{F}}_4$  (9.2 mg, 0.010 mmol, 10 mol%) in  $\text{CH}_2\text{Cl}_2$  (0.2 mL) in a Schlenk with a Teflon valve was stirred at room temperature for 10 min under  $\text{N}_2$ . Then, the green suspension was concentrated under vacuum and the resulting solid was dried under vacuum at room temperature for 10 min. The Schlenk tube was refilled with  $\text{N}_2$ , and phthalimide (**1a**, 14.7 mg, 0.10 mmol), solvent (0.2 mL), and styrene (**2a**, 31.2 mg, 0.30 mmol) were added to the tube. Then, the

Teflon valve was closed, and the mixture was stirred at 120 °C in an oil bath for 48 h. After the reaction mixture was concentrated under vacuum, the residue was subjected to preparative TLC on silica gel eluted with hexane/EtOAc (5:1) to give the addition product **3aa**. The ee was measured by HPLC with a chiral stationary column (Daicel Chiralpak ID).

**Table S1** Reaction optimization

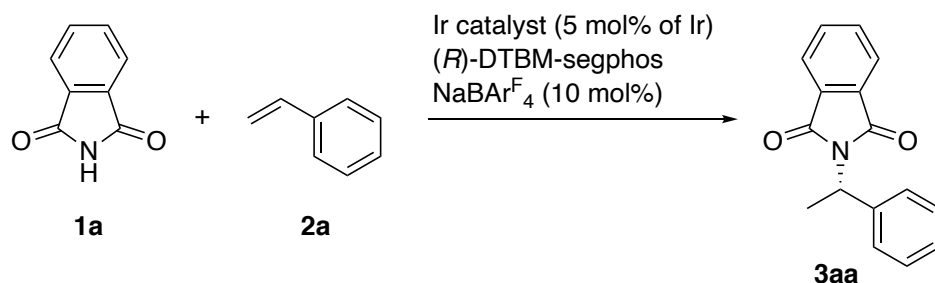

| entry                 | Ir catalyst                                            | solvent                     | temp (°C) | time (h) | yield (%) <sup>b</sup> | ee (%) <sup>c</sup> |
|-----------------------|--------------------------------------------------------|-----------------------------|-----------|----------|------------------------|---------------------|
| 1                     | [IrCl(cod)] <sub>2</sub>                               | 1,2-dichloroethane          | 120       | 18       | 16                     | N.D                 |
| 2                     | [IrCl(coe) <sub>2</sub> ] <sub>2</sub>                 | 1,2-dichloroethane          | 120       | 18       | trace                  | N.D                 |
| 3                     | [IrCl(cod) <sub>2</sub> ] <sub>2</sub> BF <sub>4</sub> | 1,2-dichloroethane          | 120       | 18       | 0                      | –                   |
| 4                     | [IrCl(cod) <sub>2</sub> ] <sub>2</sub> OTf             | 1,2-dichloroethane          | 120       | 18       | 0                      | –                   |
| 5                     | [IrCl(cod)] <sub>2</sub>                               | 1,2-dichloroethane          | 120       | 72       | 59                     | 96                  |
| 6                     | [IrCl(cod)] <sub>2</sub>                               | toluene                     | 120       | 48       | 36                     | 96                  |
| 7                     | [IrCl(cod)] <sub>2</sub>                               | 1,2-dimethoxyethane         | 120       | 72       | 0                      | –                   |
| 8                     | [IrCl(cod)] <sub>2</sub>                               | CH <sub>3</sub> CN          | 120       | 72       | 0                      | –                   |
| 9                     | [IrCl(cod)] <sub>2</sub>                               | <i>N</i> -methylpyrrolidone | 120       | 72       | 0                      | –                   |
| 10                    | [IrCl(cod)] <sub>2</sub>                               | cyclohexane                 | 120       | 48       | 50                     | 96                  |
| 11                    | [IrCl(cod)] <sub>2</sub>                               | methylcyclohexane           | 120       | 48       | 63                     | 95                  |
| 12                    | [IrCl(cod)] <sub>2</sub>                               | methylcyclohexane           | 120       | 18       | 6                      | N.D                 |
| 13 <sup>d</sup>       | [IrCl(cod)] <sub>2</sub>                               | methylcyclohexane           | 120       | 18       | 30                     | N.D                 |
| 14 <sup>d,e</sup>     | [IrCl(cod)] <sub>2</sub>                               | methylcyclohexane           | 120       | 18       | 27                     | N.D                 |
| 15 <sup>d,e</sup>     | [IrCl(cod)] <sub>2</sub>                               | methylcyclohexane           | 140       | 48       | 91                     | N.D                 |
| 16 <sup>d,e</sup>     | [IrCl(cod)] <sub>2</sub>                               | methylcyclohexane           | 140       | 18       | 35                     | N.D                 |
| 17 <sup>d,e,f</sup>   | [IrCl(cod)] <sub>2</sub>                               | methylcyclohexane           | 140       | 18       | 65                     | 93                  |
| 18 <sup>d,e,f,g</sup> | [IrCl(cod)] <sub>2</sub>                               | methylcyclohexane           | 140       | 18       | 0                      | –                   |

<sup>a</sup>Reaction conditions: **1a** (0.10 mmol), **2a** (0.30 mmol), Ir catalyst (5 mol% of Ir), (*R*)-DTBM-segphos (0.0060 mmol, 6 mol%), and NaBAR<sup>F</sup><sub>4</sub> (0.020 mmol, 10 mol%) in solvent (0.2 mL). N.D.: Not determined. <sup>b</sup>Isolated yields. <sup>c</sup>Determined by HPLC with a chiral stationary phase column: Chiralpak ID. <sup>d</sup>Distilled **1a** was used. <sup>e</sup>Performed in methylcyclohexane (0.4 mL). <sup>f</sup>Performed with 5 mol% of (*R*)-DTBM-segphos. <sup>g</sup>Without NaBAR<sup>F</sup><sub>4</sub>.

#### 4. Procedure for Table 1

##### *For Entries 1-5*

A mixture of  $[\text{IrCl}(\text{cod})]_2$  (1.7 mg, 0.0025 mmol, 5 mol% Ir), ligand (0.0050 mmol, 5 mol%), and  $\text{NaBAR}^{\text{F}}_4$  (9.2 mg, 0.010 mmol, 10 mol%) in  $\text{CH}_2\text{Cl}_2$  (0.2 mL) in a Schlenk tube with a Teflon valve was stirred at room temperature for 5 min under  $\text{N}_2$ . Then, the green suspension was concentrated under vacuum and the resulting solid was dried under vacuum at room temperature for 5 min. The Schlenk tube was refilled with  $\text{N}_2$ , and phthalimide (**1a**, 14.7 mg, 0.10 mmol), methylcyclohexane (0.4 mL), and styrene (**2a**, 31.2 mg, 0.30 mmol) were added to the tube. Then, the Teflon valve was closed, and the mixture was stirred at 140 °C in an oil bath or in a heating block for 48 h. After the reaction mixture was concentrated under vacuum, the residue was subjected to preparative TLC on silica gel eluted with hexane/EtOAc (5:1) to give the addition product **3aa**. The ee was measured by HPLC with a chiral stationary column (Daicel Chiralpak ID).

##### *For Entry 6*

A mixture of  $[\text{Ir}(\text{cod})_2]\text{BAR}^{\text{F}}_4$  (6.4 mg, 0.0050 mmol, 5 mol%), (*S*)-DTBM-segphos (5.9 mg, 0.0050 mmol, 5 mol%) in  $\text{CH}_2\text{Cl}_2$  (0.2 mL) in a Schlenk tube was stirred at room temperature for 5 min under  $\text{N}_2$ . Then, the suspension was concentrated under vacuum and the resulting solid was dried under vacuum at room temperature for 5 min. The Schlenk tube was refilled with  $\text{N}_2$ , and phthalimide (**1a**, 14.7 mg, 0.10 mmol), methylcyclohexane (0.4 mL), and styrene (**2a**, 31.2 mg, 0.30 mmol) were added to the tube. Then, the Teflon valve was closed, and the mixture was stirred at 140 °C in a heating block for 48 h. After the reaction mixture was concentrated under vacuum, the residue was subjected to preparative TLC on silica gel eluted with hexane/EtOAc (5:1) to give the addition product **3aa**.

#### 5. Procedure for Schemes 2 and 3

A mixture of  $[\text{IrCl}(\text{cod})]_2$  (1.7 mg, 0.0025 mmol, 5 mol% Ir), (*S*)-DTBM-segphos (5.9 mg, 0.0050 mmol, 5 mol%), and  $\text{NaBAR}^{\text{F}}_4$  (9.2 mg, 0.010 mmol, 10 mol%) in  $\text{CH}_2\text{Cl}_2$  (0.2 mL) in a Schlenk tube with a Teflon valve was stirred at room temperature for 5 min under  $\text{N}_2$ . Then, the green suspension was concentrated under vacuum and the resulting solid was dried under vacuum at room temperature for 5 min. The Schlenk tube was refilled with  $\text{N}_2$ , and phthalimide **1** (0.10 mmol), methylcyclohexane (0.4 mL), and alkene **2** (0.30 mmol) were added to the tube. Then, the Teflon valve was closed, and the mixture was stirred at 140 °C in an oil bath or in a heating block for 48 h. After the reaction mixture was concentrated under vacuum, the residue was subjected to preparative TLC on silica gel eluted with hexane/EtOAc to give the addition product **3**. The ee was measured by HPLC with chiral stationary columns.

## 6. NMR experiments for the reaction of a cationic iridium complex with phthalimide

A mixture of  $[\text{IrCl}(\text{coe})_2]_2$  (4.4 mg, 0.0050 mmol), (*S*)-DTBM-segphos (11.8 mg, 0.010 mmol, 5 mol%),  $\text{NaBAR}^{\text{F}}_4$  (9.2 mg, 0.010 mmol), and phthalimide (2.9 mg, 0.020 mmol, 2 equiv) in  $\text{CD}_3\text{CN}$  (0.6 mL) in an NMR tube was heated at 80 °C in an oil bath for 15 min under  $\text{N}_2$ . After cooling to room temperature, nitromethane (4.7 mg) was added as an internal standard, and the sample was measured by  $^1\text{H}$  NMR at room temperature. Major two peaks of the hydrides are as follows;  $^1\text{H}$  NMR (400 MHz,  $\text{CD}_3\text{CN}$ )  $\delta$  -18.0 (t,  $J_{\text{P-H}} = 15$  Hz, 1H), -20.0 (dd,  $J_{\text{P-H}} = 23, 14$  Hz, 0.17H);  $^{31}\text{P}$   $\{^1\text{H}\}$  NMR (162 MHz,  $\text{CD}_3\text{CN}$ )  $\delta$  -0.90 (d,  $J_{\text{P-P}} = 21$  Hz), -2.96 (d,  $J_{\text{P-P}} = 21$  Hz).

## 7. Reaction of phthalimide with styrene- $d_3$

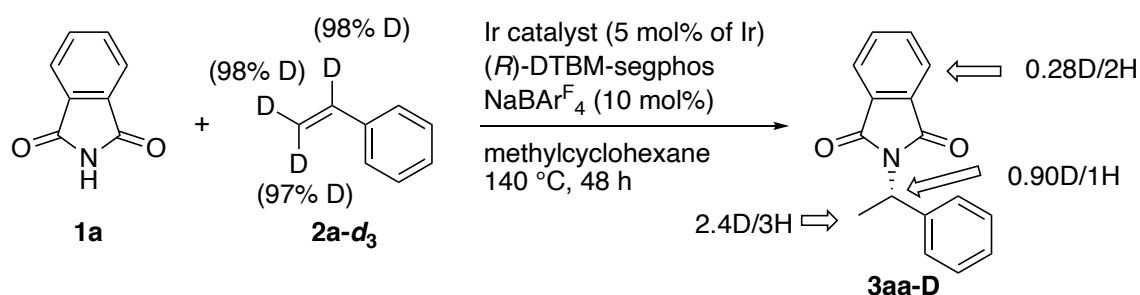

A mixture of  $[\text{IrCl}(\text{cod})]_2$  (1.7 mg, 0.0025 mmol, 5 mol% Ir), (*S*)-DTBM-segphos (5.9 mg, 0.0050 mmol, 5 mol%), and  $\text{NaBAR}^{\text{F}}_4$  (9.2 mg, 0.010 mmol, 10 mol%) in  $\text{CH}_2\text{Cl}_2$  (0.2 mL) in a Schlenk tube with a Teflon valve was stirred at room temperature for 5 min under  $\text{N}_2$ . Then, the green suspension was concentrated under vacuum and the resulting solid was dried under vacuum at room temperature for 5 min. The Schlenk tube was refilled with  $\text{N}_2$ , and phthalimide **1** (14.7 mg, 0.10 mmol), methylcyclohexane (0.4 mL), and styrene- $d_3$ <sup>8</sup> (**2a-d<sub>3</sub>**, 32.2 mg, 0.30 mmol) were added to the tube. Then, the Teflon valve was closed, and the mixture was stirred at 140 °C in an oil bath or in a heating block for 48 h. After the reaction mixture was concentrated under vacuum, the residue was subjected to preparative TLC on silica gel eluted with hexane/EtOAc (5:1) to give the addition product **3aa-D** (colorless oil, 9.7 mg, 40% yield). colorless oil, 9.7 mg, 40% yield).  $^1\text{H}$  NMR (400 MHz,  $\text{CDCl}_3$ )  $\delta$  7.83–7.77 (m, 1.72H), 7.73–7.65 (m, 2H), 7.50 (d,  $J = 7.2$  Hz, 2H), 7.33–7.30 (m, 2H), 7.29–7.23 (m, 1H), 5.60–5.53 (m, 0.10H), 1.93–1.87 (m, 0.61H);  $^2\text{H}$  NMR (61 MHz,  $\text{CHCl}_3$ )  $\delta$  7.85 (s, 0.28D), 5.55 (s, 0.90D), 1.90 (s, 2.4D).

## 8. Characterization of the products

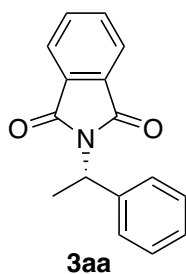

**Compound 3aa** (CAS: 3976-26-9 for (*S*)-**3aa**, Table 1, entry 1, colorless oil, 21.4 mg, 85% yield, 93% ee (*S*)). A solution of EtOAc/hexane (1:5) was used as an eluent for preparative TLC. The ee was measured by HPLC [Chiralpak ID, hexane/2-propanol = 9:1, flow 0.5 mL/min, 254 nm,  $t_1 = 14.3$  min (minor),  $t_2 = 15.1$  min (major)].  $[\alpha]_D^{25} -60$  ( $c$  0.96,  $\text{CHCl}_3$ ) for 93% ee (*S*);  $^1\text{H NMR}$  (400 MHz,  $\text{CDCl}_3$ )  $\delta$  7.83–7.77 (m, 2H), 7.73–7.65 (m, 2H), 7.50 (d,  $J = 7.2$  Hz, 2H), 7.33 (t,  $J = 7.2$  Hz, 2H), 7.26 (t,  $J = 7.2$  Hz, 1H), 5.58 (q,  $J = 7.6$  Hz, 1H), 1.93 (d,  $J = 7.6$  Hz, 3H). The absolute configuration of **3aa** was determined to be *S* by comparison of the specific rotation with the reported values ( $[\alpha]_D^{23} -31.4$  ( $c$  0.5,  $\text{CHCl}_3$ ) for (*S*)-**3aa**,<sup>9</sup>  $[\alpha]_D^{25} +86.3$  ( $c$  0.31,  $\text{CHCl}_3$ ) for (*R*)-**3aa**<sup>10</sup>). For other compounds except for **3at**, the absolute configurations were assigned by analogy with **3aa**.

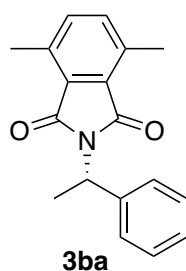

**Compound 3ba** (Scheme 2, colorless solid, 23.2 mg, 83% yield, 82% ee (*S*)). A solution of EtOAc/hexane (1:5) was used as an eluent for preparative TLC. The ee was measured by HPLC [Chiralpak ID, hexane/2-propanol = 9:1, flow 0.5 mL/min, 254 nm,  $t_1 = 10.9$  min (minor),  $t_2 = 11.8$  min (major)].  $[\alpha]_D^{25} -64$  ( $c$  0.95,  $\text{CHCl}_3$ ) for 82% ee (*S*);  $^1\text{H NMR}$  (400 MHz,  $\text{CDCl}_3$ )  $\delta$  7.49 (d,  $J = 9.6$  Hz, 2H), 7.36–7.19 (m, 5H), 5.53 (q,  $J = 9.6$  Hz, 1H), 2.60 (s, 6H), 1.89 (d,  $J = 9.6$  Hz, 3H);  $^{13}\text{C}\{^1\text{H}\}$  NMR (100 MHz,  $\text{CDCl}_3$ )  $\delta$  168.9, 140.5, 135.9, 135.2, 128.7, 128.4, 127.5, 127.4, 48.9, 17.4, 17.3; HRMS (DART-TOF)  $m/z$ :  $[\text{M} + \text{H}]^+$  Calcd for  $\text{C}_{18}\text{H}_{18}\text{NO}_2$  280.1332; Found 280.1329.

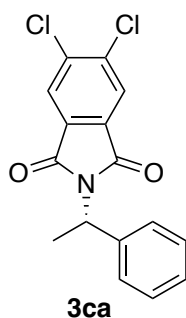

**Compound 3ca** (Scheme 2, colorless solid, 6.4 mg, which was obtained after purification by GPC to remove a small amount of impurities, 20% yield, 92% ee (*S*)). A solution of EtOAc/hexane (1:5) was used as an eluent for preparative TLC. The ee was measured by HPLC [Chiralpak ID, hexane/2-propanol = 19:1, flow 0.5 mL/min, 254 nm,  $t_1$  = 13.8 min (major),  $t_2$  = 15.8 min (minor)].  $[\alpha]_D^{25}$  -41 (*c* 0.56, CHCl<sub>3</sub>) for 92% ee (*S*); <sup>1</sup>H NMR (400 MHz, CDCl<sub>3</sub>) δ 7.88 (s, 2H), 7.47 (d, *J* = 7.6 Hz, 2H), 7.36–7.24 (m, 3H), 5.54 (q, *J* = 7.2 Hz, 1H), 1.92 (d, *J* = 7.2 Hz, 3H); <sup>13</sup>C{<sup>1</sup>H} NMR (100 MHz, CDCl<sub>3</sub>) δ 166.1, 139.7, 138.8, 131.1, 128.6, 127.9, 127.4, 125.3, 50.2, 17.4; HRMS (DART-TOF) *m/z*: [M + H]<sup>+</sup> Calcd for C<sub>16</sub>H<sub>12</sub><sup>35</sup>ClNO<sub>2</sub> 320.0230; Found 320.0240.

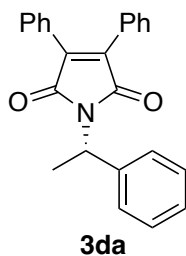

**Compound 3da** (Scheme 2, yellow solid, 23.4 mg, which was obtained after purification by GPC to remove a small amount of impurities, 66% yield, 92% ee (*S*)). A solution of EtOAc/hexane (1:5) was used as an eluent for preparative TLC. The ee was measured by HPLC [Chiralpak AD-H, hexane/2-propanol = 30:1, flow 0.5 mL/min, 254 nm,  $t_1$  = 15.4 min (minor),  $t_2$  = 22.5 min (major)].  $[\alpha]_D^{25}$  -44 (*c* 1.10, CHCl<sub>3</sub>) for 92% ee (*S*); <sup>1</sup>H NMR (400 MHz, CDCl<sub>3</sub>) δ 7.55 (d, *J* = 7.2 Hz, 2H), 7.48–7.43 (m, 4H), 7.40–7.27 (m, 9H), 5.53 (q, *J* = 7.6 Hz, 1H), 1.93 (d, *J* = 7.6 Hz, 3H); <sup>13</sup>C{<sup>1</sup>H} NMR (100 MHz, CDCl<sub>3</sub>) δ 170.4, 140.4, 135.9, 129.9, 129.7, 128.54, 128.49, 128.46, 127.7, 127.6, 50.1, 17.6; HRMS (DART-TOF) *m/z*: [M + H]<sup>+</sup> Calcd for C<sub>24</sub>H<sub>20</sub>NO<sub>2</sub> 354.1489; Found 354.1481.

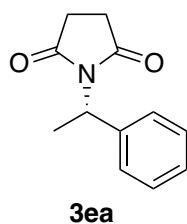

**Compound 3ea** (CAS: 62993-44-6 for (*S*)-**3ea**, Scheme 2: colorless solid, 13.2 mg, 65% yield, 90% ee (*S*)). A solution of MeOH/CH<sub>2</sub>Cl<sub>2</sub> (1:100) was used as an eluent for preparative TLC. The ee was measured by HPLC (Chiralpak IB, hexane/2-propanol = 9:1, flow 0.5 mL/min, 254 nm, *t*<sub>1</sub> = 22.9 min (major), *t*<sub>2</sub> = 27.6 min (minor)). [ $\alpha$ ]<sup>25</sup><sub>D</sub> -78 (*c* 0.80, CHCl<sub>3</sub>) for 90% ee (*S*); <sup>1</sup>H NMR (400 MHz, CDCl<sub>3</sub>)  $\delta$  7.43 (d, *J* = 7.6 Hz, 2H), 7.30 (t, *J* = 7.6 Hz, 2H), 7.26 (d, *J* = 7.6 Hz, 1H), 5.40 (q, *J* = 7.2 Hz, 1H), 2.62 (s, 4H), 1.79 (d, *J* = 7.2 Hz, 3H).

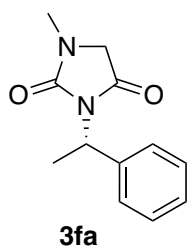

**Compound 3fa** (Scheme 2: colorless solid, 14.6 mg, 67% yield, 89% ee (*S*)). A solution of MeOH/CH<sub>2</sub>Cl<sub>2</sub> (1:50) was used as an eluent for preparative TLC. The ee was measured by HPLC (Chiralpak ID, hexane/2-propanol = 4:1, flow 0.5 mL/min, 254 nm, *t*<sub>1</sub> = 17.4 min (minor), *t*<sub>2</sub> = 18.9 min (major)). [ $\alpha$ ]<sup>25</sup><sub>D</sub> -51 (*c* 0.64, CHCl<sub>3</sub>) for 89% ee (*S*); <sup>1</sup>H NMR (CDCl<sub>3</sub>)  $\delta$  7.49 (d, *J* = 7.2 Hz, 2H), 7.34 (t, *J* = 7.2 Hz, 2H), 7.27 (t, *J* = 7.2 Hz, 1H), 5.33 (q, *J* = 7.6 Hz, 1H), 3.82 (d, *J* = 17.4 Hz, 1H), 3.76 (d, *J* = 17.4 Hz, 1H), 2.95 (s, 3H), 1.84 (d, *J* = 7.6 Hz, 3H); <sup>13</sup>C{<sup>1</sup>H} NMR (100 MHz, CDCl<sub>3</sub>)  $\delta$  169.5, 156.5, 140.0, 128.4, 127.8, 127.5, 51.3, 50.6, 29.5, 17.0; HRMS (DART-TOF) *m/z*: [M + H]<sup>+</sup> Calcd for C<sub>12</sub>H<sub>15</sub>N<sub>2</sub>O<sub>2</sub> 219.1128; Found 219.1122.

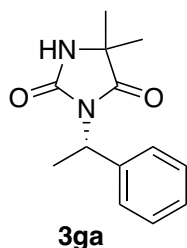

**Compound 3ga** (Scheme 2: colorless solid, 20.7 mg, 89% yield, 93% ee (*S*)). The ee was measured by HPLC (Chiralpak ID, hexane/2-propanol = 9:1, flow 0.5 mL/min, 254 nm, *t*<sub>1</sub> = 13.3 min (minor), *t*<sub>2</sub> = 14.3 min (major)). [ $\alpha$ ]<sup>25</sup><sub>D</sub> -39 (*c* 0.66, CHCl<sub>3</sub>) for 93% ee (*S*); <sup>1</sup>H NMR (400 MHz, CDCl<sub>3</sub>)  $\delta$  7.43 (d, *J* = 7.6 Hz, 2H), 7.32 (t, *J* = 7.6 Hz, 2H), 7.26 (t, *J* = 7.6 Hz, 1H), 5.59 (brs, 1H),



5.32 (q,  $J = 7.2$  Hz, 1H), 1.83 (d,  $J = 7.2$  Hz, 3H), 1.40 (s, 3H), 1.37 (s, 3H);  $^{13}\text{C}\{^1\text{H}\}$  NMR (100 MHz,  $\text{CDCl}_3$ )  $\delta$  177.0, 156.0, 140.1, 128.5, 127.6, 127.1, 58.0, 50.0, 25.1, 25.0, 17.2; HRMS (DART-TOF)  $m/z$ :  $[\text{M} + \text{H}]^+$  Calcd for  $\text{C}_{13}\text{H}_{17}\text{N}_2\text{O}_2$  233.1285; Found 233.1290.

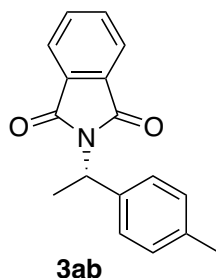

**Compound 3ab** (CAS: 36244-75-4 for **3ab**, Scheme 3: colorless oil, 24.8 mg, 93% yield, 93% ee). A solution of EtOAc/hexane (1:10) was used as an eluent for preparative TLC. The ee was measured by HPLC (Chiralpak AD-H, hexane/2-propanol = 30:1, flow 0.5 mL/min, 254 nm,  $t_1 = 22.5$  min (major),  $t_2 = 25.1$  min (minor)).  $[\alpha]^{25}_{\text{D}} -66$  ( $c$  1.17,  $\text{CHCl}_3$ ) for 93% ee (*S*);  $^1\text{H}$  NMR (400 MHz,  $\text{CDCl}_3$ )  $\delta$  7.83–7.76 (m, 2H), 7.71–7.65 (m, 2H), 7.41 (d,  $J = 8.0$  Hz, 2H), 7.13 (d,  $J = 8.0$  Hz, 2H), 5.54 (q,  $J = 7.2$  Hz, 1H), 2.31 (s, 3H), 1.91 (d,  $J = 7.2$  Hz, 3H).

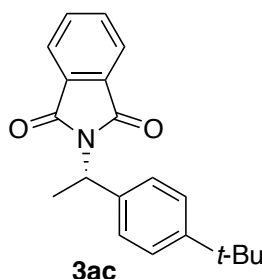

**Compound 3ac** (CAS: 2763070-09-1 for **3ac**, Scheme 3: colorless oil, 28.1 mg, 91% yield, 90% ee (*S*)). A solution of EtOAc/hexane (1:5) was used as an eluent for preparative TLC. The ee was measured by HPLC (Chiralpak AD-H, hexane/2-propanol = 100:1, flow 1.0 mL/min, 254 nm,  $t_1 = 11.5$  min (major),  $t_2 = 12.4$  min (minor)).  $[\alpha]^{25}_{\text{D}} -52$  ( $c$  1.40,  $\text{CHCl}_3$ ) for 90% ee (*S*);  $^1\text{H}$  NMR (400 MHz,  $\text{CDCl}_3$ )  $\delta$  7.84–7.76 (m, 2H), 7.72–7.63 (m, 2H), 7.45 (d,  $J = 8.4$  Hz, 2H), 7.34 (d,  $J = 8.4$  Hz, 2H), 5.55 (q,  $J = 7.2$  Hz, 1H), 1.92 (d,  $J = 7.2$  Hz, 3H), 1.29 (s, 9H).

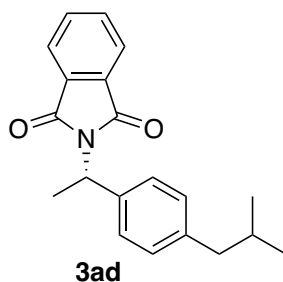

**Compound 3ad** (Scheme 3: colorless solid, 24.3 mg, 79% yield, 93% ee (*S*)). A solution of EtOAc/hexane (1:5) was used as an eluent for preparative TLC. The ee was measured by HPLC (Chiralpak ID, hexane/2-propanol = 100:1, flow 0.5 mL/min, 254 nm,  $t_1$  = 22.3 min (major),  $t_2$  = 24.7 min (minor)).  $[\alpha]^{25}_D -55$  ( $c$  1.14,  $\text{CHCl}_3$ ) for 93% ee (*S*);  $^1\text{H NMR}$  (400 MHz,  $\text{CDCl}_3$ )  $\delta$  7.83–7.76 (m, 2H), 7.70–7.65 (m, 2H), 7.41 (d,  $J$  = 7.8 Hz, 2H), 7.10 (d,  $J$  = 7.8 Hz, 2H), 5.55 (q,  $J$  = 7.2 Hz, 1H), 2.43 (d,  $J$  = 7.6 Hz, 2H), 1.92 (d,  $J$  = 7.2 Hz, 3H), 1.83 (sept,  $J$  = 6.4 Hz, 1H), 0.88 (d,  $J$  = 6.4 Hz, 6H);  $^{13}\text{C}\{^1\text{H}\}$  NMR (100 MHz,  $\text{CDCl}_3$ )  $\delta$  168.2, 141.1, 137.5, 133.8, 132.0, 129.1, 127.2, 123.1, 49.4, 45.0, 30.1, 22.4, 17.6; HRMS (DART-TOF)  $m/z$ :  $[\text{M} + \text{H}]^+$  Calcd for  $\text{C}_{20}\text{H}_{22}\text{NO}_2$  308.1645; Found 308.1643.

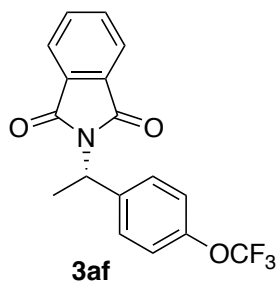

**Compound 3af** (Scheme 3: colorless oil, 6.8 mg, 20% yield, 90% ee (*S*)). A solution of EtOAc/hexane (1:10) was used as an eluent for preparative TLC. The ee was measured by HPLC (Chiralpak ID, hexane/2-propanol = 200:1, flow 0.5 mL/min, 254 nm,  $t_1$  = 23.4 min (major),  $t_2$  = 25.8 min (minor)).  $[\alpha]^{25}_D -57$  ( $c$  0.34,  $\text{CHCl}_3$ ) for 90% ee (*S*);  $^1\text{H NMR}$  (400 MHz,  $\text{CDCl}_3$ )  $\delta$  7.85–7.78 (m, 2H), 7.75–7.67 (m, 2H), 7.54 (d,  $J$  = 8.4 Hz, 2H), 7.17 (d,  $J$  = 8.4 Hz, 2H), 5.56 (q,  $J$  = 7.4 Hz, 1H), 1.92 (d,  $J$  = 7.4 Hz, 3H);  $^{13}\text{C}\{^1\text{H}\}$  NMR (100 MHz,  $\text{CDCl}_3$ )  $\delta$  168.0, 148.5, 138.9, 134.0, 131.8, 129.0, 123.3, 120.9, 120.4 (q,  $J_{\text{F-C}}$  = 257 Hz), 48.9, 17.5; HRMS (DART-TOF)  $m/z$ :  $[\text{M} + \text{H}]^+$  Calcd for  $\text{C}_{17}\text{H}_{13}\text{F}_3\text{NO}_3$  336.0842; Found 336.0828.

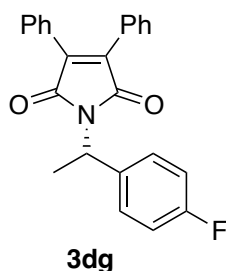

**Compound 3dg** (Scheme 3: yellow solid, 32.1 mg, 86% yield, 93% ee (*S*)). A solution of EtOAc/hexane (1:5) was used as an eluent for preparative TLC. The ee was measured by HPLC (Chiralpak AD-H×2, hexane/2-propanol = 30:1, flow 0.5 mL/min, 254 nm,  $t_1$  = 31.9 min (minor),  $t_2$  = 40.7 min (major)).  $[\alpha]^{25}_D$  -46 (*c* 1.29, CHCl<sub>3</sub>) for 93% ee (*S*); <sup>1</sup>H NMR (400 MHz, CDCl<sub>3</sub>) δ 7.56–7.49 (m, 2H), 7.45 (dd, *J* = 8.0, 1.6 Hz, 4H), 7.40–7.30 (m, 6H), 7.03 (t, *J* = 8.8 Hz, 2H), 5.49 (q, *J* = 7.6 Hz, 1H), 1.91 (d, *J* = 7.6 Hz, 3H); <sup>13</sup>C{<sup>1</sup>H} NMR (100 MHz, CDCl<sub>3</sub>) δ 170.4, 162.2 (d,  $J_{C-F}$  = 245 Hz), 136.2, 136.0, 129.9, 129.8, 129.3 (d,  $J_{C-F}$  = 9 Hz), 128.5, 115.3 (d,  $J_{C-F}$  = 21 Hz), 49.4, 17.8; HRMS (DART-TOF) *m/z*: [M + H]<sup>+</sup> Calcd for C<sub>24</sub>H<sub>19</sub>FNO<sub>2</sub> 372.1394; Found 372.1387.

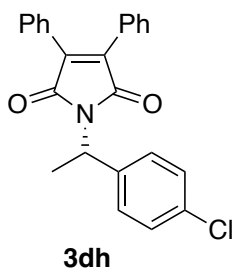

**Compound 3dh** (Scheme 3: yellow solid, 28.8 mg, 74% yield, 94% ee (*S*)). A solution of EtOAc/hexane (1:5) was used as an eluent for preparative TLC. The ee was measured by HPLC (Chiralpak AD-H×2, hexane/2-propanol = 30:1, flow 0.5 mL/min, 254 nm,  $t_1$  = 36.4 min (minor),  $t_2$  = 43.4 min (major)).  $[\alpha]^{25}_D$  -44 (*c* 1.29, CHCl<sub>3</sub>) for 94% ee (*S*); <sup>1</sup>H NMR (400 MHz, CDCl<sub>3</sub>) δ 7.51–7.41 (m, 6H), 7.41–7.28 (m, 8H), 5.48 (q, *J* = 7.6 Hz, 1H), 1.90 (d, *J* = 7.6 Hz, 3H); <sup>13</sup>C{<sup>1</sup>H} NMR (100 MHz, CDCl<sub>3</sub>) δ 170.4, 138.8, 136.0, 133.6, 129.9, 129.8, 129.0, 128.6, 128.5, 128.4, 49.4, 17.6; HRMS (DART-TOF) *m/z*: [M + H]<sup>+</sup> Calcd for C<sub>24</sub>H<sub>19</sub><sup>35</sup>ClNO<sub>2</sub> 388.1099; Found 388.1091.

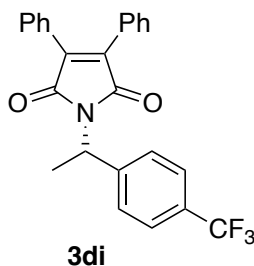

**Compound 3di** (Scheme 3: yellow solid, 10.1 mg, 24% yield, 93% ee (*S*)). A solution of EtOAc/hexane (1:5) was used as an eluent for preparative TLC. The ee was measured by HPLC (Chiralpak AD-H×2, hexane/2-propanol = 30:1, flow 0.5 mL/min, 254 nm,  $t_1$  = 27.0 min (minor),  $t_2$

= 30.5 min (major)).  $[\alpha]_{\text{D}}^{25} -47$  ( $c$  0.37,  $\text{CHCl}_3$ ) for 93% ee (*S*);  $^1\text{H NMR}$  (400 MHz,  $\text{CDCl}_3$ )  $\delta$  7.69–7.57 (m, 4H), 7.45 (d,  $J = 6.8$  Hz, 4H), 7.42–7.29 (m, 6H), 5.55 (q,  $J = 7.6$  Hz, 1H), 1.94 (d,  $J = 7.6$  Hz, 3H);  $^{13}\text{C}\{^1\text{H}\}$  NMR (100 MHz,  $\text{CDCl}_3$ )  $\delta$  170.3, 144.2, 136.0, 130.1, 129.9, 128.5, 128.4, 127.9, 125.5 (d,  $J_{\text{C-F}} = 4$  Hz), 124.0 (d,  $J_{\text{C-F}} = 271$  Hz), 49.6, 17.5; HRMS (DART-TOF)  $m/z$ :  $[\text{M} + \text{H}]^+$  Calcd for  $\text{C}_{25}\text{H}_{19}\text{F}_3\text{NO}_2$  422.1366; Found 422.1362.

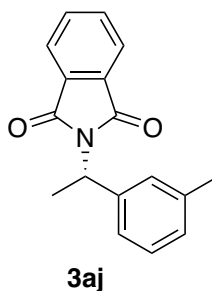

**Compound 3aj** (CAS: 875738-08-2 for (*R*)-**3aj**, Scheme 3: colorless oil, 21.3 mg, 80% yield, 92% ee (*S*)). A solution of EtOAc/hexane (1:10) was used as an eluent for preparative TLC. The ee was measured by HPLC (Chiralpak IB $\times$ 2, hexane/2-propanol = 100:1, flow 0.5 mL/min, 254 nm,  $t_1 = 32.3$  min (minor),  $t_2 = 33.2$  min (major)).  $[\alpha]_{\text{D}}^{25} -62$  ( $c$  1.07,  $\text{CHCl}_3$ ) for 92% ee (*S*);  $^1\text{H NMR}$  (400 MHz,  $\text{CDCl}_3$ )  $\delta$  7.84–7.78 (m, 2H), 7.72–7.65 (m, 2H), 7.32 (d,  $J = 7.6$  Hz, 1H), 7.30 (s, 1H), 7.22 (t,  $J = 7.6$  Hz, 1H), 7.07 (d,  $J = 7.6$  Hz, 1H), 5.54 (q,  $J = 7.2$  Hz, 1H), 2.34 (s, 3H), 1.92 (d,  $J = 7.2$  Hz, 3H).

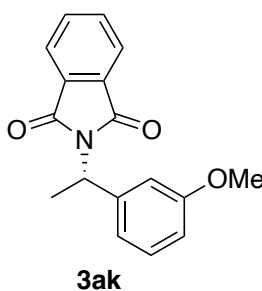

**Compound 3ak** (CAS: 365515-83-9 for **3ak**, Scheme 3: colorless oil, 26.1 mg, 93% yield, 89% ee (*S*)). A solution of EtOAc/hexane (1:5) was used as an eluent for preparative TLC. The ee was measured by HPLC (Chiralpak IB, hexane/2-propanol = 9:1, flow 0.5 mL/min, 254 nm,  $t_1 = 12.8$  min (minor),  $t_2 = 14.3$  min (major)).  $[\alpha]_{\text{D}}^{25} -52$  ( $c$  1.30,  $\text{CHCl}_3$ ) for 89% ee (*S*);  $^1\text{H NMR}$  (400 MHz,  $\text{CDCl}_3$ )  $\delta$  7.84–7.78 (m, 2H), 7.72–7.65 (m, 2H), 7.24 (t,  $J = 6.8$  Hz, 1H), 7.12–7.03 (m, 2H), 6.80 (dd,  $J = 8.4, 2.0$  Hz, 1H), 5.53 (q,  $J = 7.6$  Hz, 1H), 3.79 (s, 3H), 1.91 (d,  $J = 7.6$  Hz, 3H).

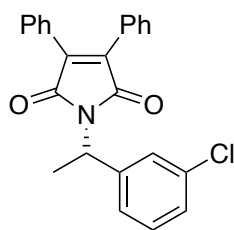

**3dl**

**Compound 3dl** (Scheme 3: yellow solid, 22.3 mg, 57% yield, 93% ee (*S*)). A solution of EtOAc/hexane (1:5) was used as an eluent for preparative TLC. The ee was measured by HPLC (Chiralpak AD-H×2, hexane/2-propanol = 30:1, flow 0.5 mL/min, 254 nm,  $t_1$  = 22.7 min (minor),  $t_2$  = 29.1 min (major)).  $[\alpha]^{25}_D$  -46 (*c* 0.90, CHCl<sub>3</sub>) for 93% ee (*S*); <sup>1</sup>H NMR (400 MHz, CDCl<sub>3</sub>) δ 7.54–7.20 (m, 14H), 5.45 (q, *J* = 7.2 Hz, 1H), 1.88 (d, *J* = 7.2 Hz, 3H); <sup>13</sup>C{<sup>1</sup>H} NMR (100 MHz, CDCl<sub>3</sub>) δ 170.3, 142.3, 136.0, 134.4, 129.9, 129.86, 129.80, 128.5, 128.0, 127.9, 125.7, 49.5, 17.5; HRMS (DART-TOF) *m/z*: [M + H]<sup>+</sup> Calcd for C<sub>24</sub>H<sub>19</sub><sup>35</sup>ClNO<sub>2</sub> 388.1099; Found 388.1103.

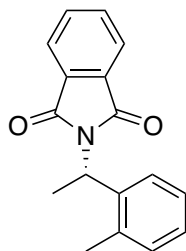

**3am**

**Compound 3am** (CAS: 2147750-06-7 for **3am**, Scheme 3: colorless oil, 12.1 mg, 46% yield, 89% ee (*S*)). A solution of EtOAc/hexane (1:10) was used as an eluent for preparative TLC. The ee was measured by HPLC (Chiralpak IB, hexane/2-propanol = 100:1, flow 0.5 mL/min, 254 nm,  $t_1$  = 16.5 min (minor),  $t_2$  = 18.4 min (major)).  $[\alpha]^{25}_D$  -92 (*c* 0.61, CHCl<sub>3</sub>) for 89% ee (*S*); <sup>1</sup>H NMR (400 MHz, CDCl<sub>3</sub>) δ 7.83–7.76 (m, 3H), 7.72–7.65 (m, 2H), 7.26 (td, *J* = 7.6, 1.2 Hz, 1H), 7.18 (td, *J* = 7.6, 1.2 Hz, 1H), 7.26 (d, *J* = 7.6 Hz, 1H), 5.71 (q, *J* = 7.6 Hz, 1H), 2.37 (s, 3H), 1.88 (d, *J* = 7.6 Hz, 3H).

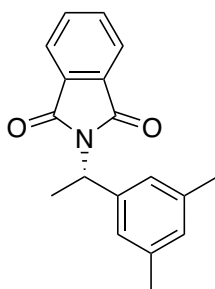

**3an**

**Compound 3an** (Scheme 3: colorless oil, 25.8 mg, 92% yield, 89% ee (*S*)). A solution of EtOAc/hexane (1:5) was used as an eluent for preparative TLC. The ee was measured by HPLC

(Chiralpak IB, hexane/2-propanol = 100:1, flow 0.5 mL/min, 254 nm,  $t_1$  = 14.8 min (minor),  $t_2$  = 15.8 min (major)).  $[\alpha]^{25}_D -65$  ( $c$  1.07,  $\text{CHCl}_3$ ) for 89% ee (*S*);  $^1\text{H NMR}$  (400 MHz,  $\text{CDCl}_3$ )  $\delta$  7.84–7.77 (m, 2H), 7.73–7.66 (m, 2H), 7.12 (s, 2H), 6.90 (s, 1H), 5.50 (q,  $J$  = 7.4 Hz, 1H), 2.30 (s, 6H), 1.91 (d,  $J$  = 7.4 Hz, 3H);  $^{13}\text{C}\{^1\text{H}\}$  NMR (100 MHz,  $\text{CDCl}_3$ )  $\delta$  168.2, 140.2, 137.9, 133.8, 132.0, 129.3, 125.2, 123.1, 49.6, 21.3, 17.6; HRMS (DART-TOF)  $m/z$ :  $[\text{M} + \text{H}]^+$  Calcd for  $\text{C}_{18}\text{H}_{18}\text{NO}_2$  280.1332; Found 280.1344.

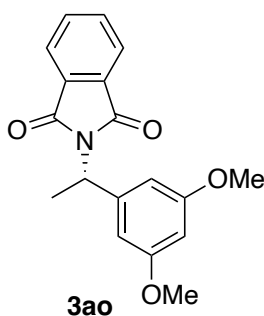

**Compound 3ao** (Scheme 3: colorless oil, 28.5 mg, 92% yield, 74% ee (*S*)). A solution of EtOAc/hexane (1:5) was used as an eluent for preparative TLC. The ee was measured by HPLC (Chiralpak IB, hexane/2-propanol = 9:1, flow 0.5 mL/min, 254 nm,  $t_1$  = 14.9 min (minor),  $t_2$  = 19.9 min (major)).  $[\alpha]^{25}_D -38$  ( $c$  1.43,  $\text{CHCl}_3$ ) for 74% ee (*S*);  $^1\text{H NMR}$  (400 MHz,  $\text{CDCl}_3$ )  $\delta$  7.87–7.77 (m, 2H), 7.72–7.66 (m, 2H), 6.66 (d,  $J$  = 2.4 Hz, 2H), 6.36 (t,  $J$  = 2.4 Hz, 1H), 5.48 (q,  $J$  = 7.6 Hz, 1H), 3.77 (s, 6H), 1.90 (d,  $J$  = 7.6 Hz, 3H);  $^{13}\text{C}\{^1\text{H}\}$  NMR (100 MHz,  $\text{CDCl}_3$ )  $\delta$  168.1, 160.7, 142.7, 133.9, 131.9, 123.2, 105.6, 99.4, 55.3, 49.7, 17.6; HRMS (DART-TOF)  $m/z$ :  $[\text{M} + \text{H}]^+$  Calcd for  $\text{C}_{18}\text{H}_{18}\text{NO}_4$  312.1230; Found 312.1223.

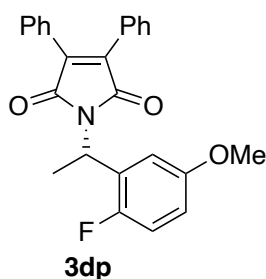

**Compound 3dp** (Scheme 3: colorless oil, 24.7 mg, 62% yield, 87% ee (*S*)). A solution of EtOAc/hexane (1:10) was used as an eluent for preparative TLC. The ee was measured by HPLC (Chiralpak IB, hexane/2-propanol = 100:1, flow 0.5 mL/min, 254 nm,  $t_1$  = 14.8 min (minor),  $t_2$  = 15.8 min (major)).  $[\alpha]^{25}_D -87$  ( $c$  1.24,  $\text{CHCl}_3$ ) for 87% ee (*S*);  $^1\text{H NMR}$  (400 MHz,  $\text{CDCl}_3$ )  $\delta$  7.48–7.43 (m, 4H), 7.40–7.30 (m, 6H), 7.23 (dd,  $J$  = 6.0, 3.4 Hz, 1H), 6.95 (t,  $J$  = 9.4 Hz, 1H), 6.77 (dt,  $J$  = 8.4, 3.4 Hz, 1H), 5.79 (q,  $J$  = 7.2 Hz, 1H), 3.80 (s, 3H), 1.87 (d,  $J$  = 7.2 Hz, 3H);  $^{13}\text{C}\{^1\text{H}\}$  NMR (100 MHz,  $\text{CDCl}_3$ )  $\delta$  170.1, 155.6 (d,  $J_{\text{C-F}}$  = 240 Hz), 155.5, 135.9, 129.9, 129.8, 128.6, 128.5, 127.8 (d,

$J_{C-F} = 15$  Hz), 115.8 (d,  $J_{C-F} = 24$  Hz), 114.5 (d,  $J_{C-F} = 3$  Hz), 113.8 (d,  $J_{C-F} = 9$  Hz), 55.7, 43.4 (d,  $J_{C-F} = 4$  Hz), 17.4; HRMS (DART-TOF)  $m/z$ :  $[M + H]^+$  Calcd for  $C_{25}H_{21}FNO_3$  402.1500; Found 402.1506.

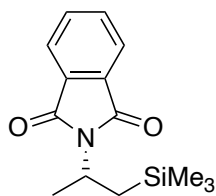

**3aq**

**Compound 3aq** (Scheme 3: colorless oil, 18.7 mg, 72% yield, 80% ee (*S*)). A solution of EtOAc/hexane (1:5) was used as an eluent for preparative TLC. The ee was measured by HPLC (Chiralpak AD-H, hexane/2-propanol = 100:1, flow 0.5 mL/min, 254 nm,  $t_1 = 12.3$  min (major),  $t_2 = 13.5$  min (minor)).  $[\alpha]_D^{25} +8$  ( $c$  0.88,  $CHCl_3$ ) for 80% ee (*S*);  $^1H$  NMR (400 MHz,  $CDCl_3$ )  $\delta$  7.84–7.77 (m, 2H), 7.71–7.65 (m, 2H), 4.61–4.48 (m, 1H), 1.49 (d,  $J = 7.2$  Hz, 3H), 1.47 (dd,  $J = 14.8, 9.8$  Hz, 1H), 1.11 (dd,  $J = 14.8, 7.2$  Hz, 1H),  $-0.03$  (s, 9H);  $^{13}C\{^1H\}$  NMR (100 MHz,  $CDCl_3$ )  $\delta$  168.4, 133.7, 132.1, 123.0, 44.6, 22.9, 22.1,  $-1.4$ ; HRMS (DART-TOF)  $m/z$ :  $[M + H]^+$  Calcd for  $C_{14}H_{20}NO_2Si$  262.1257; Found 262.1258.

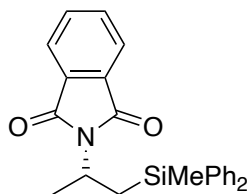

**3ar**

**Compound 3ar** (Scheme 3: colorless oil, 28.2 mg, 73% yield, 86% ee (*S*)). A solution of EtOAc/hexane (1:10) was used as an eluent for preparative TLC. The ee was measured by HPLC (Chiralpak AD-H, hexane/2-propanol = 19:1, flow 0.5 mL/min, 254 nm,  $t_1 = 12.3$  min (major),  $t_2 = 14.0$  min (minor)).  $[\alpha]_D^{25} -19$  ( $c$  1.15,  $CHCl_3$ ) for 86% ee (*S*);  $^1H$  NMR (400 MHz,  $CDCl_3$ )  $\delta$  7.28–7.23 (m, 3H), 7.05–6.98 (m, 2H), 6.94 (tt,  $J = 7.6, 1.9$  Hz, 1H), 4.73–4.59 (m, 1H), 2.28 (dd,  $J = 14.8, 11.2$  Hz, 1H), 1.510 (d,  $J = 6.8$  Hz, 1H), 1.505 (dd,  $J = 14.8, 4.4$  Hz, 1H), 0.63 (s, 3H);  $^{13}C\{^1H\}$  NMR (100 MHz,  $CDCl_3$ )  $\delta$  168.1, 136.8, 135.3, 134.2, 133.2, 131.8, 129.1, 128.7, 127.8, 127.5, 122.6, 43.9, 22.7, 20.3,  $-4.7$ . Anal. Calcd for  $C_{24}H_{23}NO_2Si$ : C, 74.77; H, 6.01; N, 3.63. Found: C, 74.75; H, 6.28; N, 3.66.

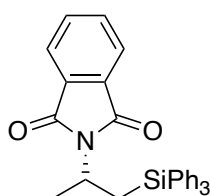

**3as**

**Compound 3as** (Scheme 3: colorless solid, 10.7 mg obtained after PTLC and GPC, 24% yield, 85% ee (*S*)). A solution of EtOAc/hexane (1:5) was used as an eluent for preparative TLC. The ee was measured by HPLC (Chiralpak AD-H, hexane/2-propanol = 19:1, flow 0.5 mL/min, 254 nm,  $t_1 = 12.0$  min (major),  $t_2 = 20.3$  min (minor)).  $[\alpha]^{25}_D +57$  ( $c$  0.30,  $\text{CHCl}_3$ ) for 85% ee (*S*);  $^1\text{H}$  NMR (400 MHz,  $\text{CDCl}_3$ )  $\delta$  7.60–7.47 (m, 10H), 7.25–7.17 (m, 9H), 4.91–4.78 (m, 1H), 2.56 (dd,  $J = 15.0, 11.0$  Hz, 1H), 1.87 (dd,  $J = 15.0, 4.2$  Hz, 1H), 1.51 (d,  $J = 7.2$  Hz, 3H);  $^{13}\text{C}\{^1\text{H}\}$  NMR (100 MHz,  $\text{CDCl}_3$ )  $\delta$  128.1, 135.5, 134.1, 133.2, 131.9, 129.2, 127.8, 122.6, 43.8, 23.1, 19.0; HRMS (ESI-TOF)  $m/z$ :  $[\text{M} + \text{Na}]^+$  Calcd for  $\text{C}_{29}\text{H}_{25}\text{NNaO}_2\text{Si}$  470.1547; Found 470.1549.

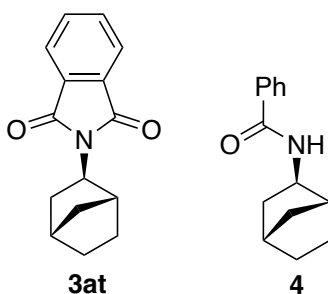

**3at**

**4**

**Compound 3at** (Scheme 3: colorless oil, 21.4 mg, 96% yield, 95% ee (1*R*,2*R*,4*S*)). A solution of EtOAc/hexane (1:5) was used as an eluent for preparative TLC. A 228 mg of **3at** was isolated by column chromatography on silica gel in the 1.0 mmol scale (94% yield, 96% ee (1*R*,2*R*,4*S*)). The ee was measured by HPLC (Chiralpak AD-H, hexane/2-propanol = 100:1, flow 1.0 mL/min, 254 nm,  $t_1 = 20.7$  min (major),  $t_2 = 22.1$  min (minor)).  $[\alpha]^{25}_D -8$  ( $c$  1.03,  $\text{CHCl}_3$ ) for 95% ee (*S*);  $^1\text{H}$  NMR (400 MHz,  $\text{CDCl}_3$ )  $\delta$  7.82–7.75 (m, 2H), 7.71–7.64 (m, 2H), 4.13 (dd,  $J = 8.0, 5.6$  Hz, 1H), 2.41 (d,  $J = 13.2$  Hz, 2H), 2.31–2.19 (m, 2H), 1.76–1.66 (m, 1H), 1.62–1.49 (m, 2H), 1.40–1.30 (m, 1H), 1.30–1.16 (m, 2H).

**Compound 4.**<sup>11</sup> To a solution of **3at** (24.1 mg, 0.10 mmol) in THF (0.4 mL) and ethanol (0.4 mL) in a Schlenk tube was added hydrazine hydrate (12.4  $\mu\text{L}$ , 0.50 mmol), and the mixture was heated in an oil bath at 80 °C for 3 h. After cooling to room temperature, the precipitate was removed by filtration and washed with  $\text{CH}_2\text{Cl}_2$ . The filtrate was washed with 1 M NaOH aq., dried over  $\text{Na}_2\text{SO}_4$ , filtered, and concentrated on a rotary evaporator. To the residue in  $\text{CH}_2\text{Cl}_2$  (1 mL) were added triethylamine (42  $\mu\text{L}$ , 0.20 mmol) and benzoyl chloride (23  $\mu\text{L}$ , 0.30 mmol), and the mixture was stirred at room temperature overnight. A small amount of water was added to the



mixture, and the resulting solution was passed through a short column of silica gel eluted with ethyl acetate. The solution was concentrated on a rotary evaporator and the residue was subjected to preparative TLC on silica gel with hexane/ethyl acetate (3:1) to give **4** (17.6 mg, 82% yield) as a colorless solid. The absolute configuration of **4** was determined to be (1*R*,2*R*,4*S*) by comparison of the specific rotation with the reported value ( $[\alpha]^{23}_{\text{D}} -15.2$  ( $c$  2.0,  $\text{CHCl}_3$ ) for 91% ee (1*R*,2*R*,4*S*)).<sup>12</sup>  $[\alpha]^{25}_{\text{D}} -13$  ( $c$  0.78,  $\text{CHCl}_3$ );  $^1\text{H NMR}$  (400 MHz,  $\text{CDCl}_3$ )  $\delta$  7.75–7.69 (m, 2H), 7.50–7.36 (m, 3H), 5.97 (br s, 1H), 3.90 (td,  $J = 7.6, 3.6$  Hz, 1H), 2.31 (d,  $J = 4.4$  Hz, 2H), 2.82 (ddd,  $J = 13.2, 8.0, 2.0$  Hz, 1H), 1.58–1.43 (m, 2H), 1.40–1.10 (m, 5H).

## 9. References

- 1 J. L. Herde, J. C. Lambert and C. V. Senoff, *Inorg. Synth.*, 1974, **15**, 18.
- 2 R. Uson, L. A. Oro and J. A. Cabeza, *Inorg. Synth.*, 1985, **23**, 126.
- 3 M. Brookhart, B. Grant and A. F. Volpe, Jr., *Organometallics*, 1992, **11**, 3920.
- 4 (a) C. Kitamura, T. Naito, A. Yoneda, T. Kawase and T. Komatsu, *Chem. Lett.*, 2012, **58**, 624; (b) L. Liu, H.-Y. Zhang, G. Yin, Y. Zhang, J. Zhao, *Chem. Pap.*, 2020, **74**, 1351.
- 5 L. Zhang, X. Chen, J. Liu, Q. Zhu, Y. Leng, X. Luo, H. Jiang and H. Liua, *Eur. J. Med. Chem.*, 2012, **58**, 624.
- 6 C. Peifer, T. Stoiber, E. Unger, F. Totzke, C. Schächtele, D. Marmé, R. Brenk, G. Klebe, D. Schollmeyer and G. Dannhardt, *J. Med. Chem.*, 2006, **49**, 1271.
- 7 R. Ramesh and D. S. Reddy, *Org. Biomol. Chem.*, 2014, **12**, 4093.
- 8 M. Hatano, T. Nishimura and H. Yorimitsu, *Org. Lett.*, 2016, **18**, 3674.
- 9 A. G. M. Barrett, D. C. Braddock, R. A. James, N. Koike and P. A. Procopiou, *J. Org. Chem.*, 1998, **63**, 6273.
- 10 S. G. Koenig, C. P. Vandenbossche, H. Zhao, P. Mousaw, S. P. Singh and R. P. Bakale, *Org. Lett.*, 2009, **11**, 433.
- 11 (a) S. W. Lardy and V. A. Schmidt, *J. Am. Chem. Soc.*, 2018, **140**, 12318; (b) S. W. Lardy and Valerie A. Schmidt D. M. Peacock, C. B. Roos and J. F. Hartwig, *ACS Cent. Sci.*, 2016, **2**, 647.
- 12 C. S. Sevov, J. Zhou and J. F. Hartwig, *J. Am. Chem. Soc.*, 2012, **134**, 11960.

## 10. NMR and HPLC charts

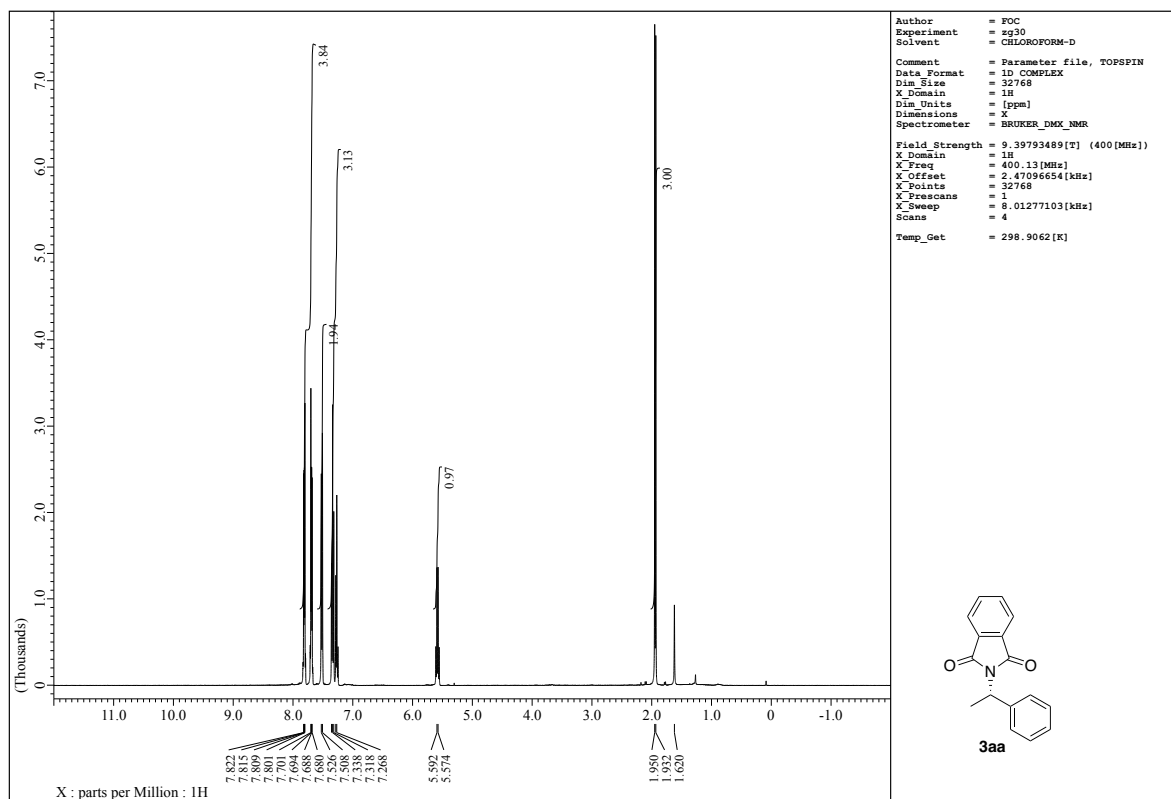

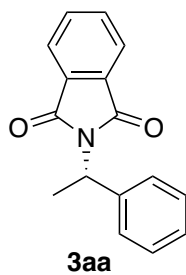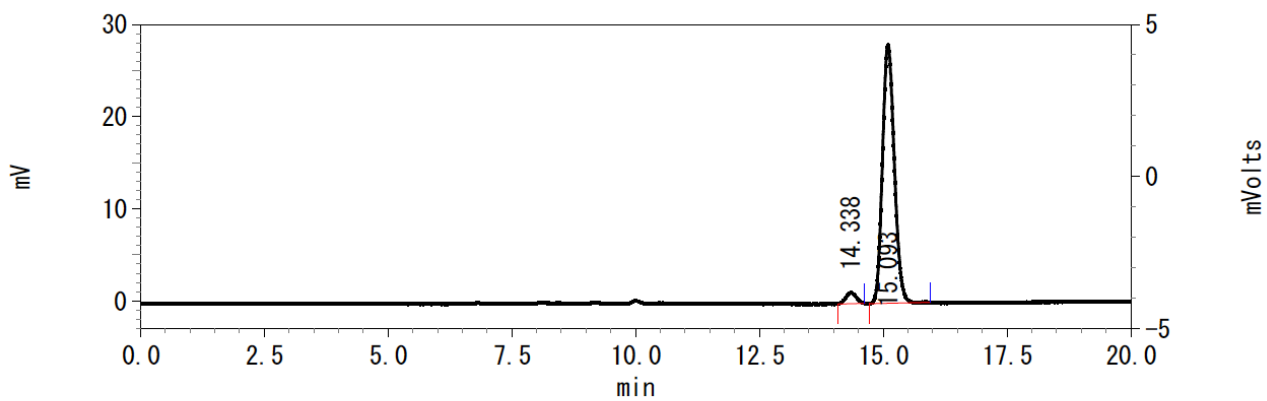

| Pk # | Retention Time | Area   | Area Percent |
|------|----------------|--------|--------------|
| 1    | 14.338         | 17620  | 3.643        |
| 2    | 15.093         | 466048 | 96.357       |

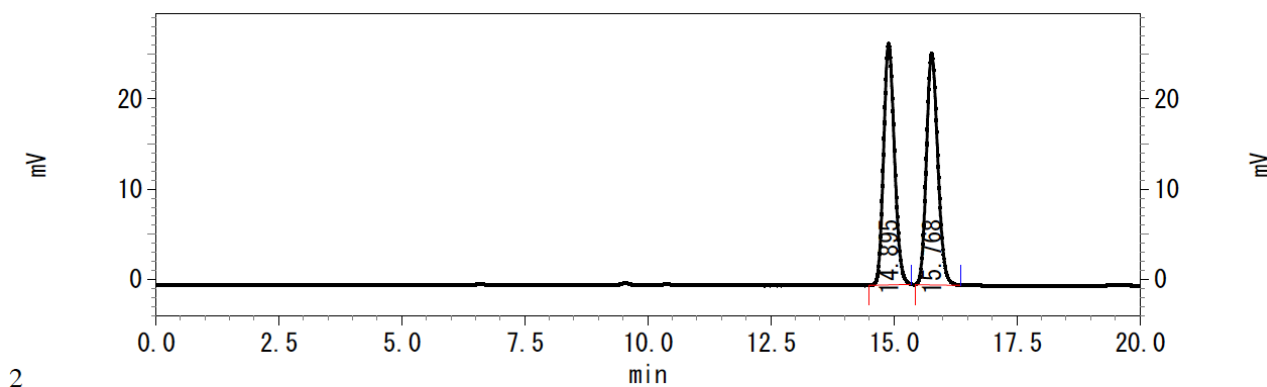

2

| Pk # | Retention Time | Area   | Area Percent |
|------|----------------|--------|--------------|
| 1    | 14.895         | 409059 | 49.792       |
| 2    | 15.768         | 412471 | 50.208       |

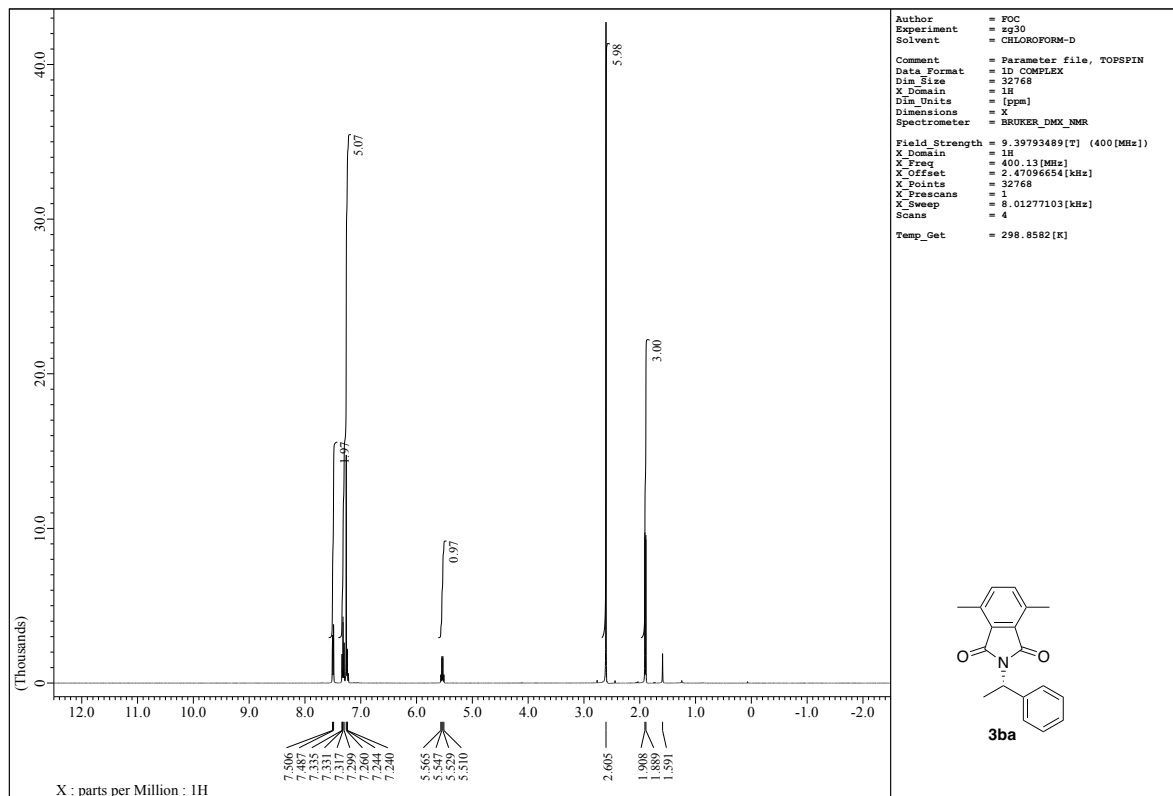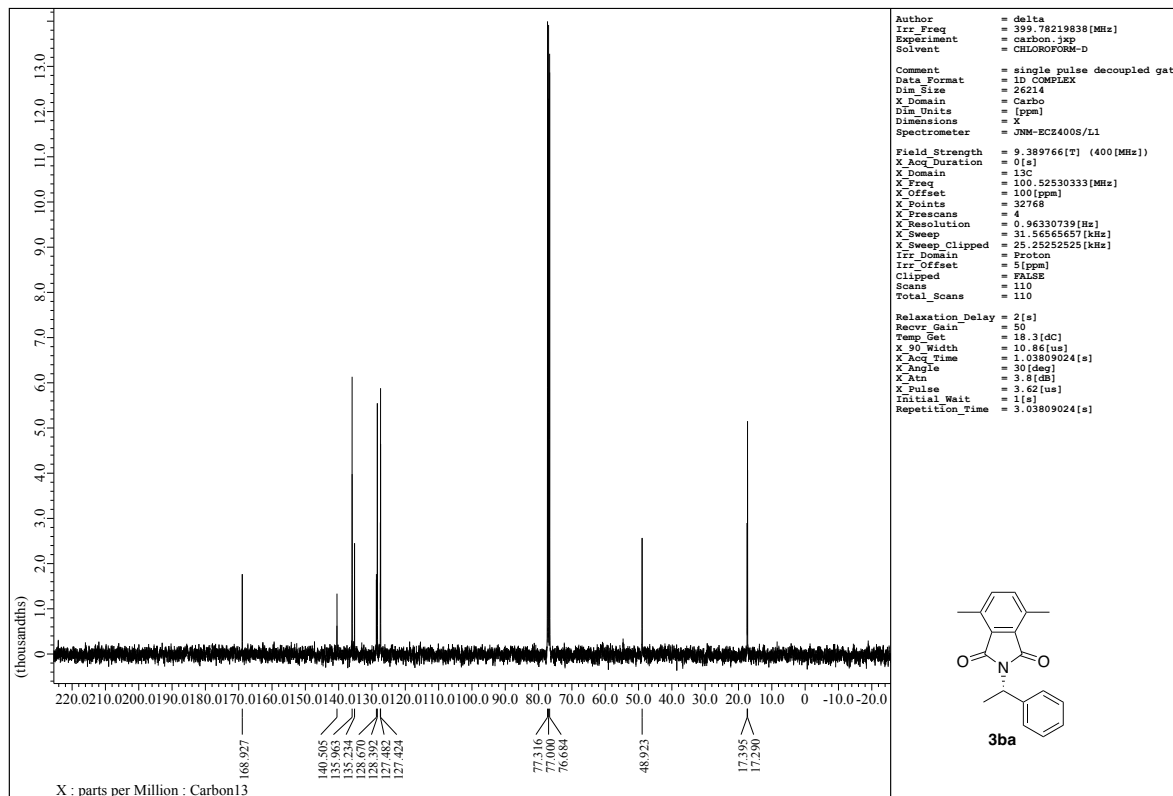

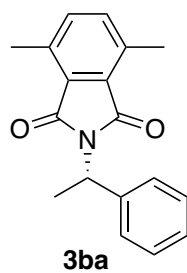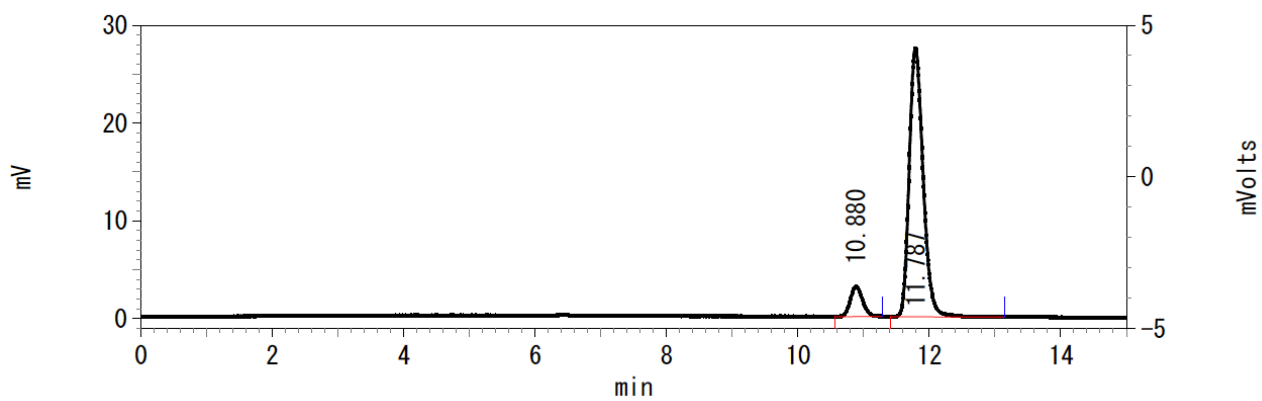

| Pk # | Retention Time | Area   | Area Percent |
|------|----------------|--------|--------------|
| 1    | 10.880         | 40465  | 9.111        |
| 2    | 11.787         | 403656 | 90.889       |

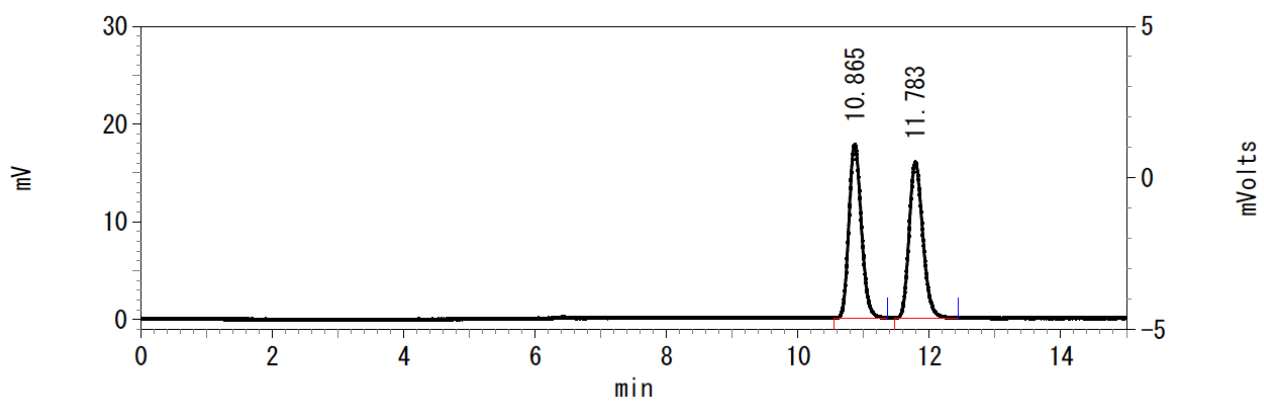

| Pk # | Retention Time | Area   | Area Percent |
|------|----------------|--------|--------------|
| 1    | 10.865         | 233028 | 50.267       |
| 2    | 11.783         | 230551 | 49.733       |

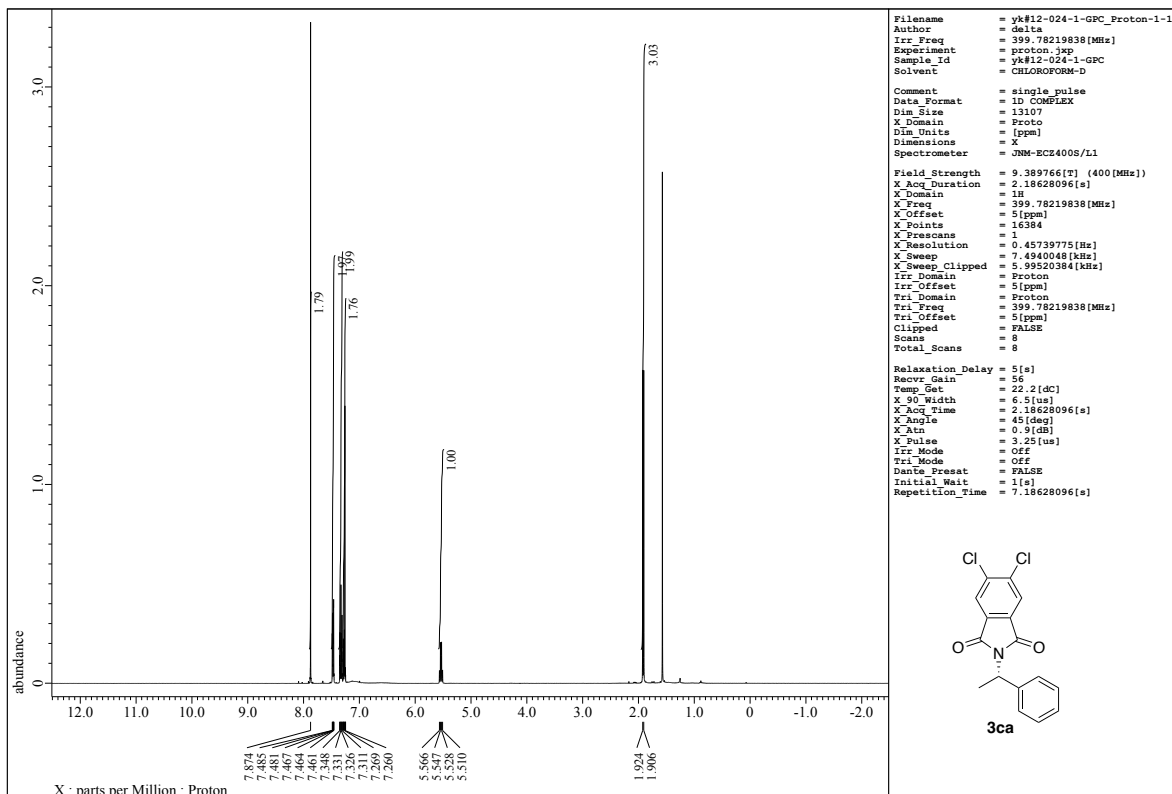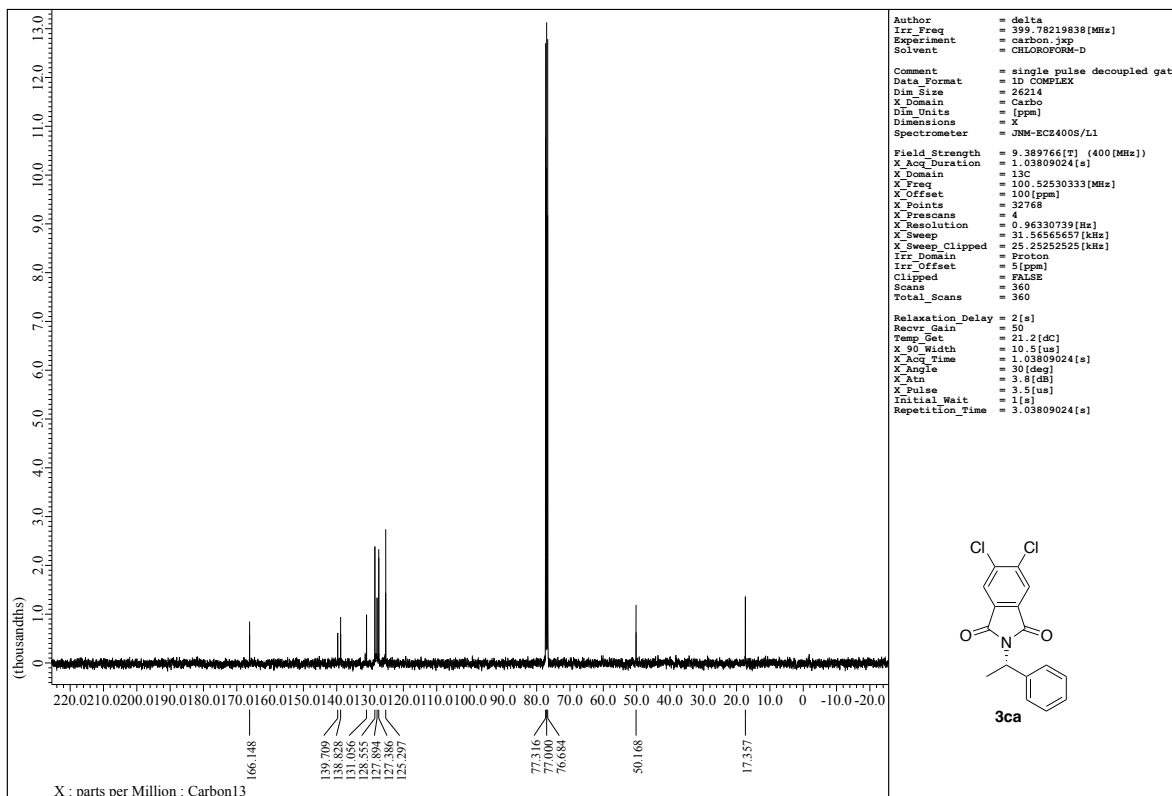

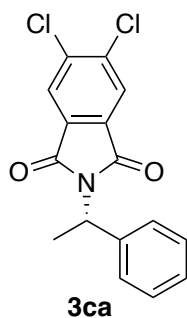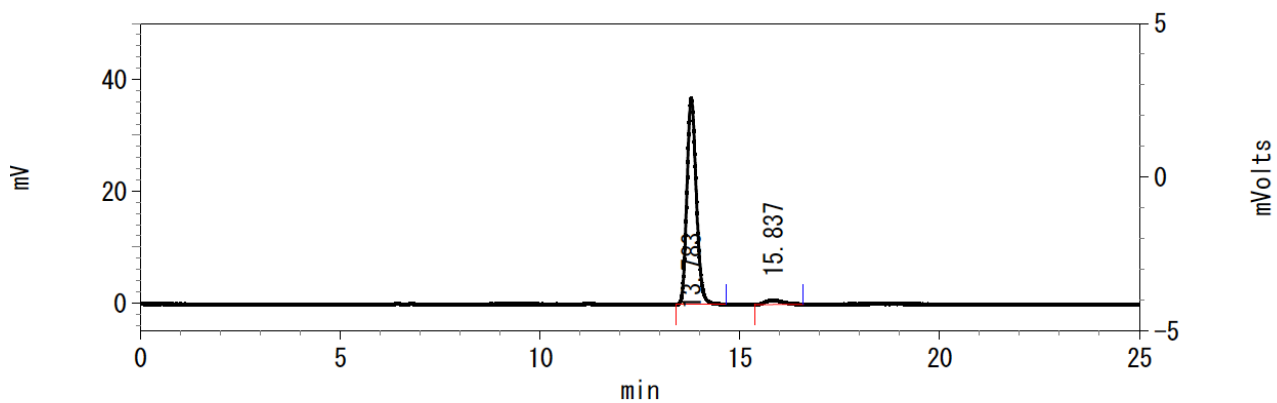

| Pk # | Retention Time | Area   | Area Percent |
|------|----------------|--------|--------------|
| 1    | 13.783         | 607294 | 96.060       |
| 2    | 15.837         | 24910  | 3.940        |

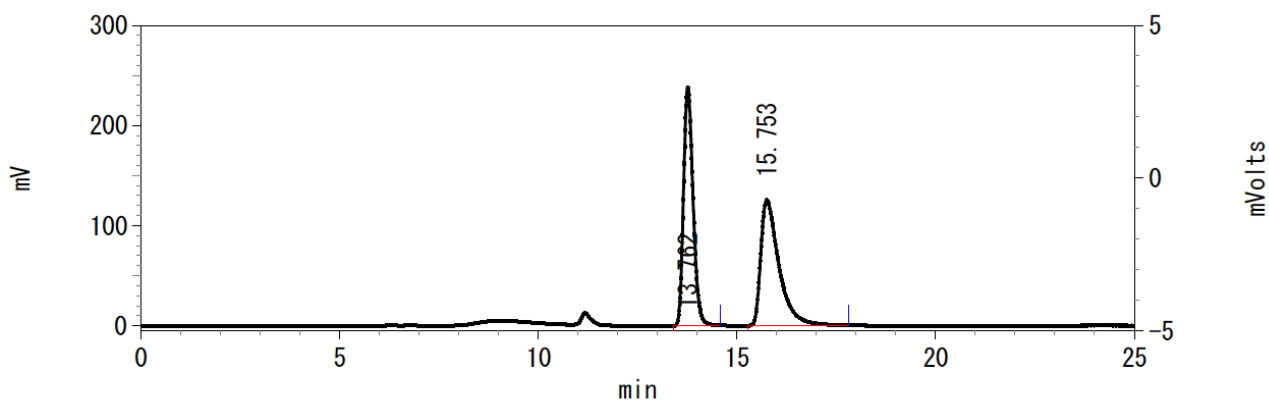

| Pk # | Retention Time | Area    | Area Percent |
|------|----------------|---------|--------------|
| 1    | 13.762         | 3981674 | 49.888       |
| 2    | 15.753         | 3999480 | 50.112       |

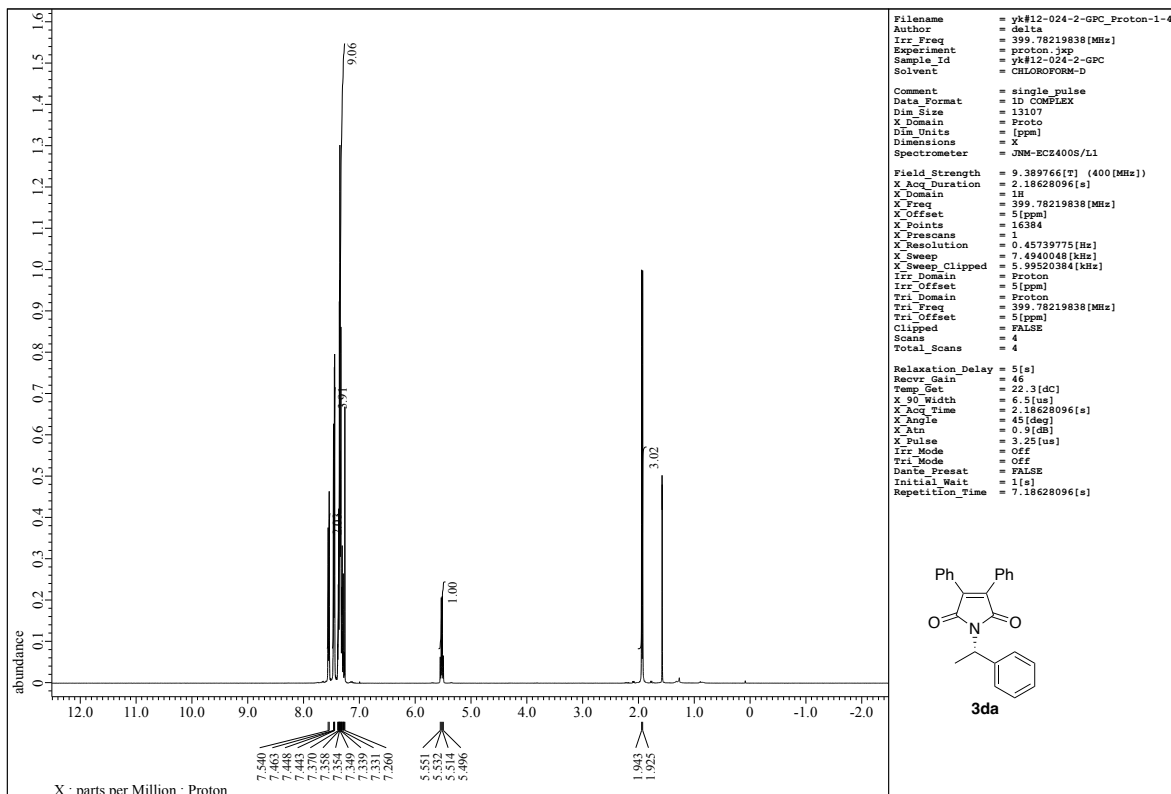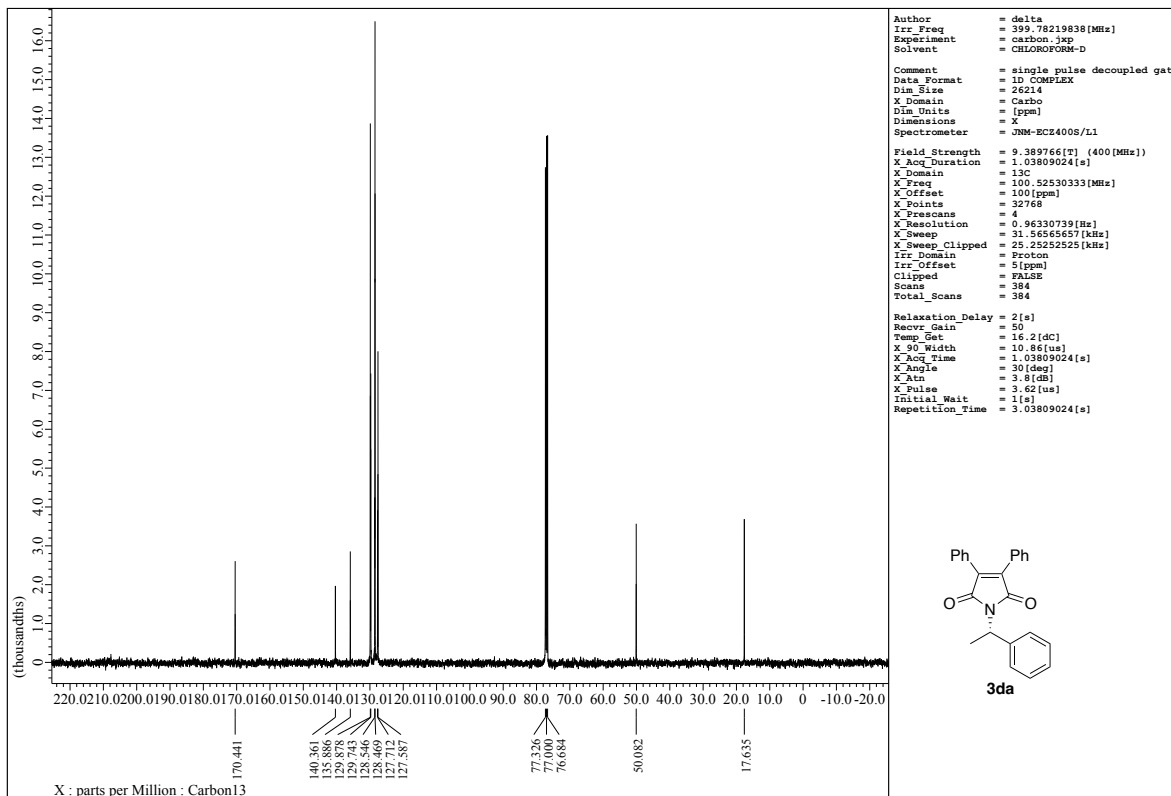



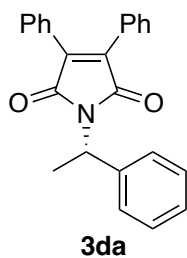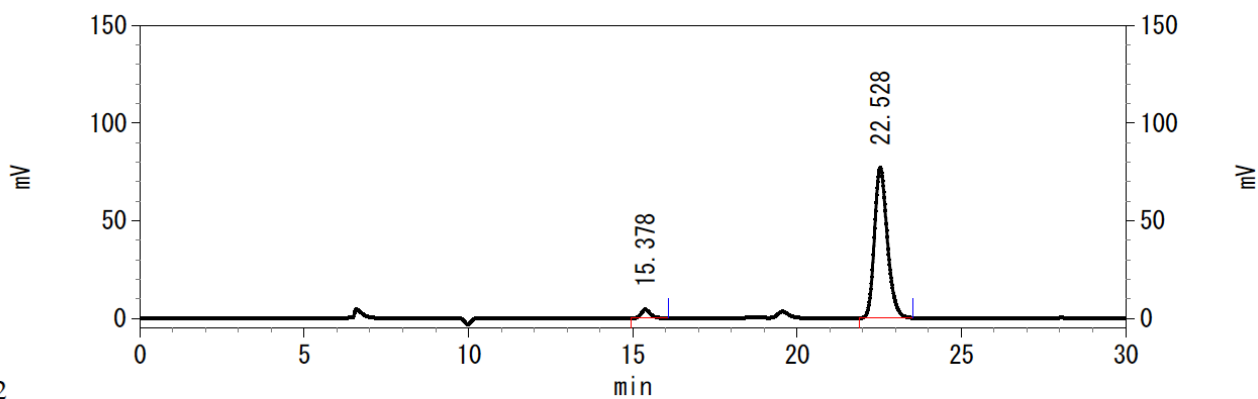

2

| Pk # | Retention Time | Area    | Area Percent |
|------|----------------|---------|--------------|
| 1    | 15.378         | 81662   | 3.752        |
| 2    | 22.528         | 2094760 | 96.248       |

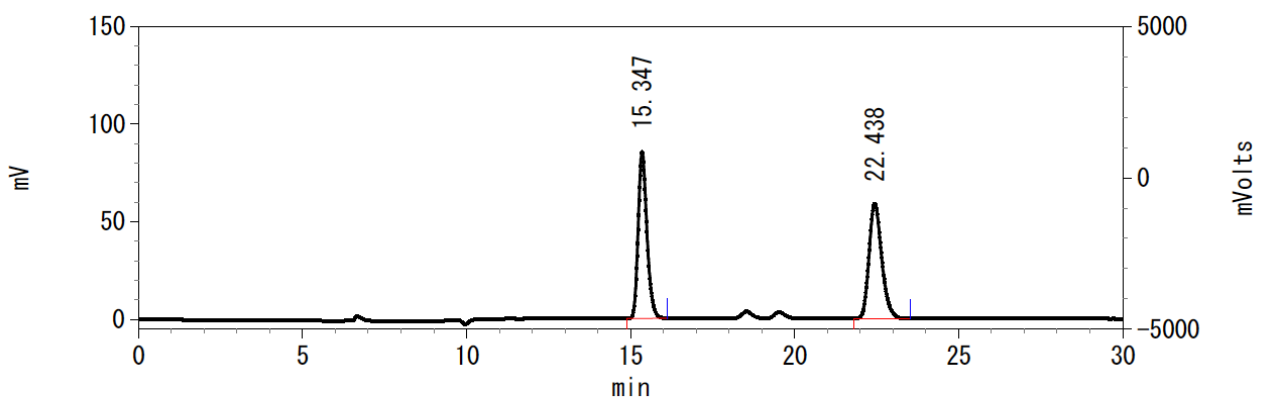

| Pk # | Retention Time | Area    | Area Percent |
|------|----------------|---------|--------------|
| 1    | 15.347         | 1587334 | 49.968       |
| 2    | 22.438         | 1589387 | 50.032       |

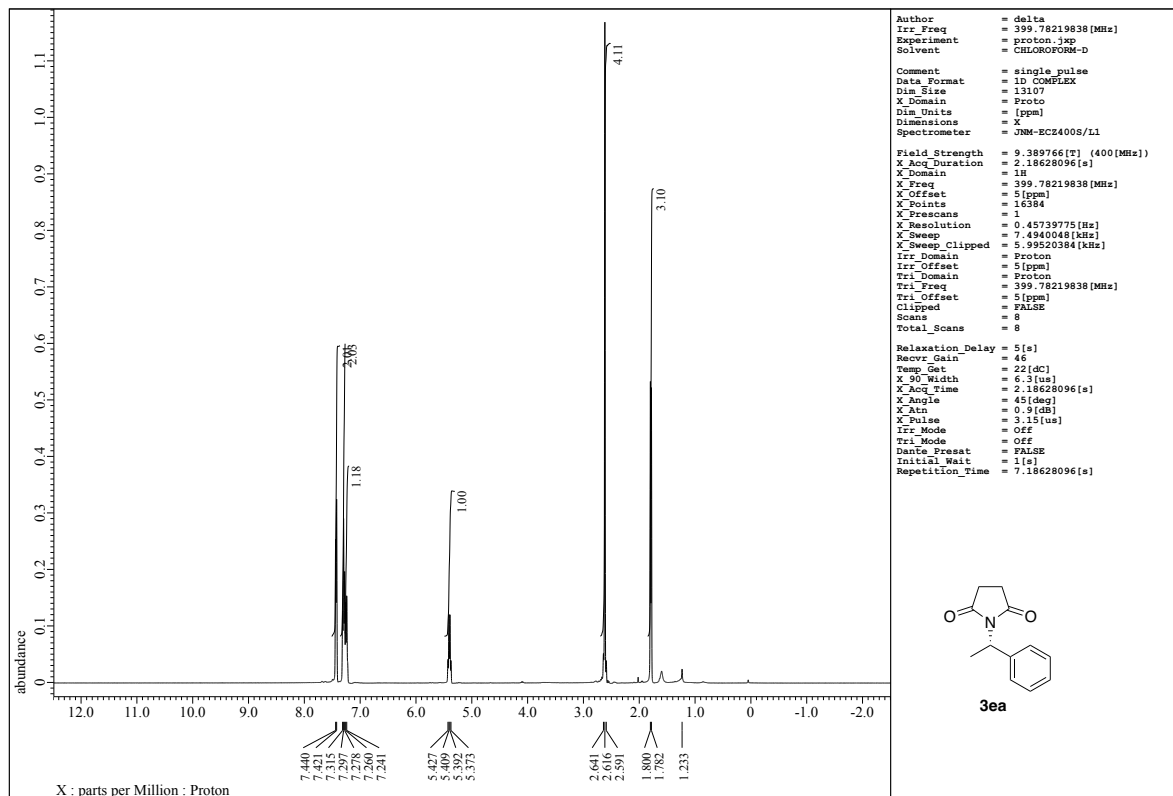

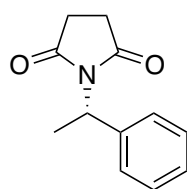

**3ea**

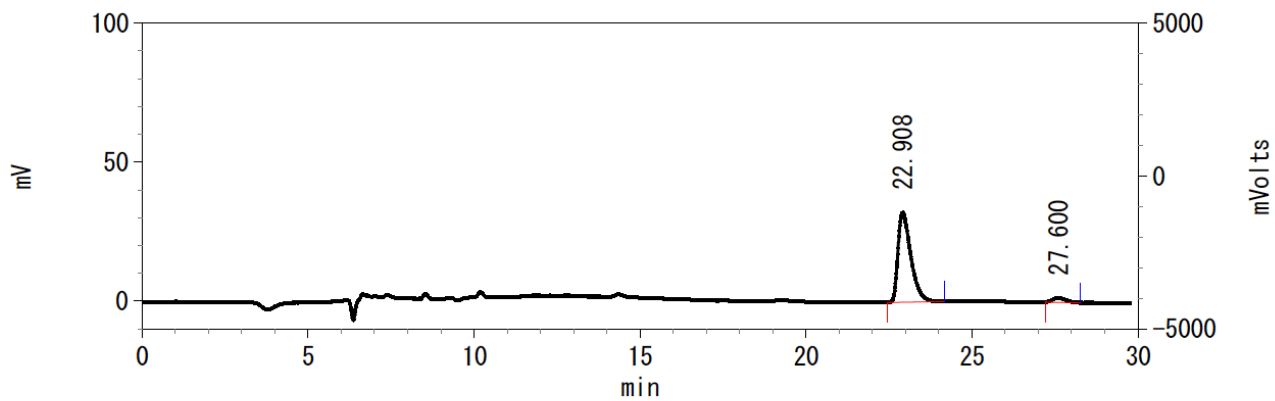

| Pk # | Retention Time | Area   | Area Percent |
|------|----------------|--------|--------------|
| 1    | 22.908         | 868205 | 94.879       |
| 2    | 27.600         | 46861  | 5.121        |

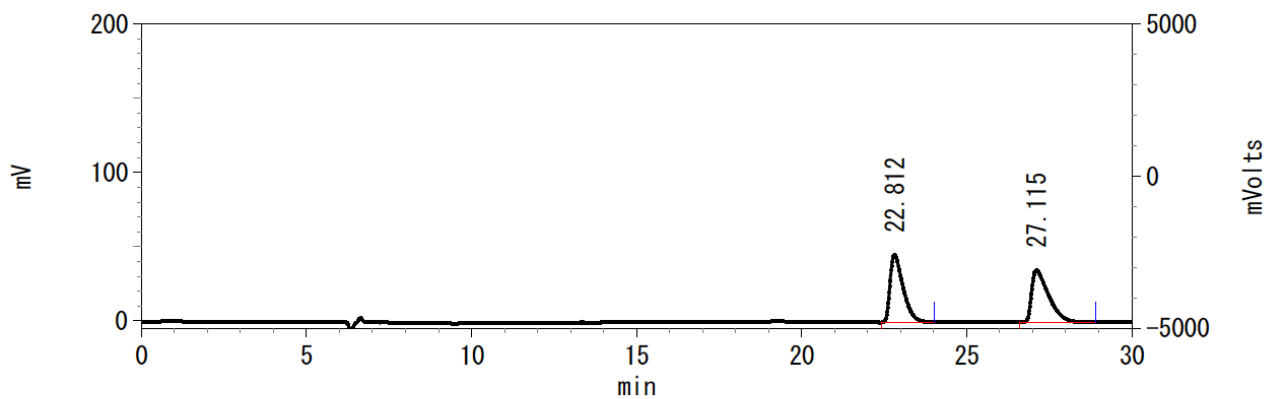

| Pk # | Retention Time | Area    | Area Percent |
|------|----------------|---------|--------------|
| 1    | 22.812         | 1253831 | 50.064       |
| 2    | 27.115         | 1250649 | 49.936       |

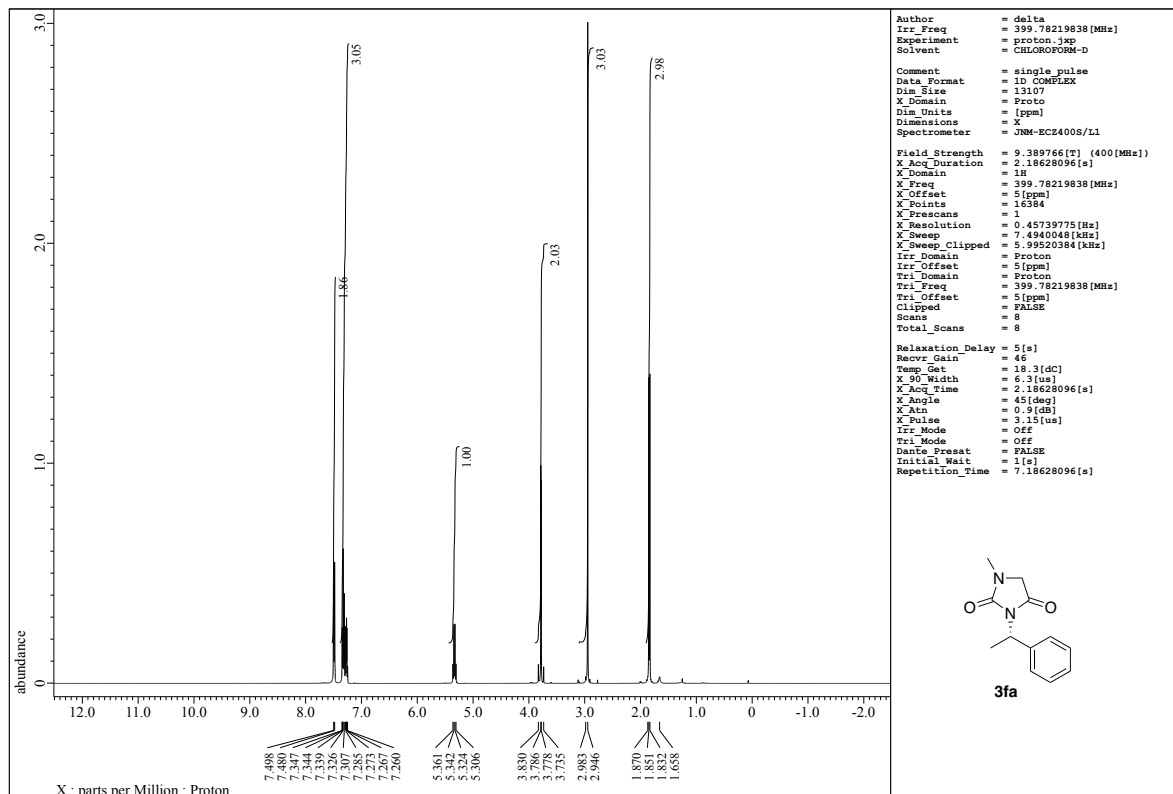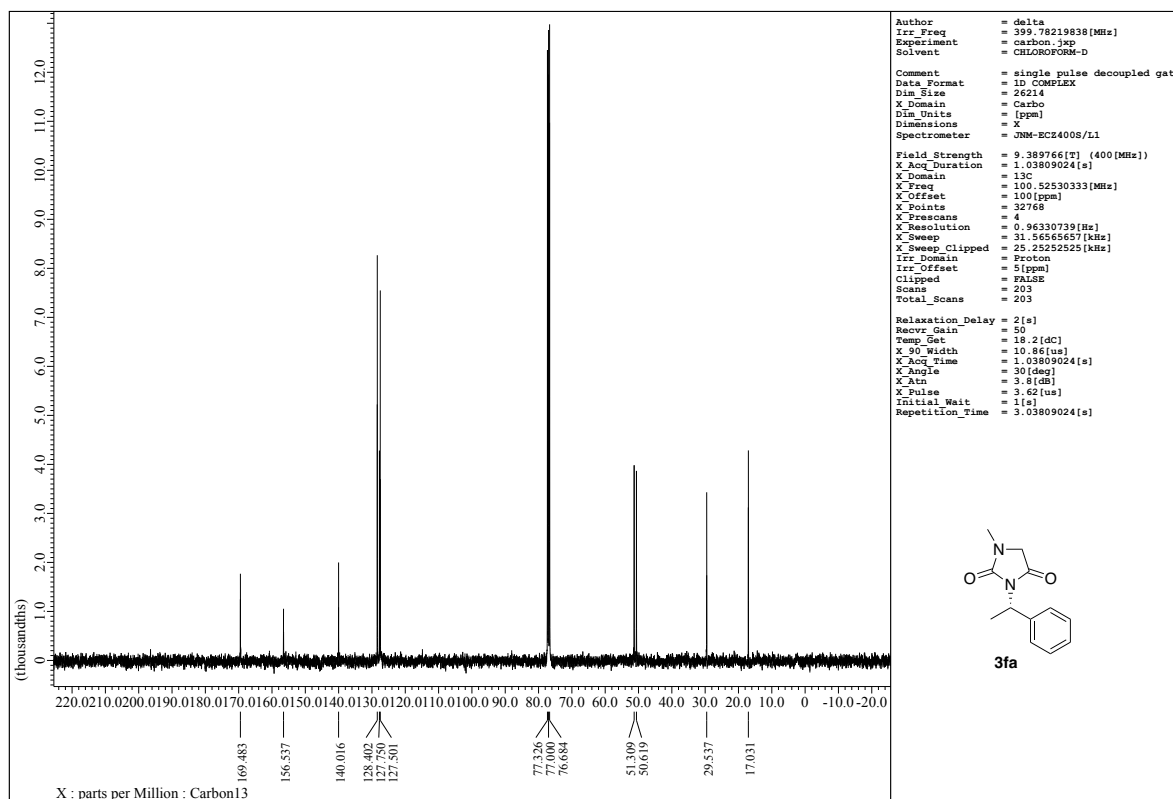

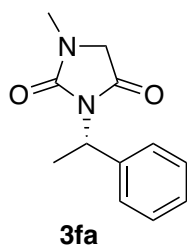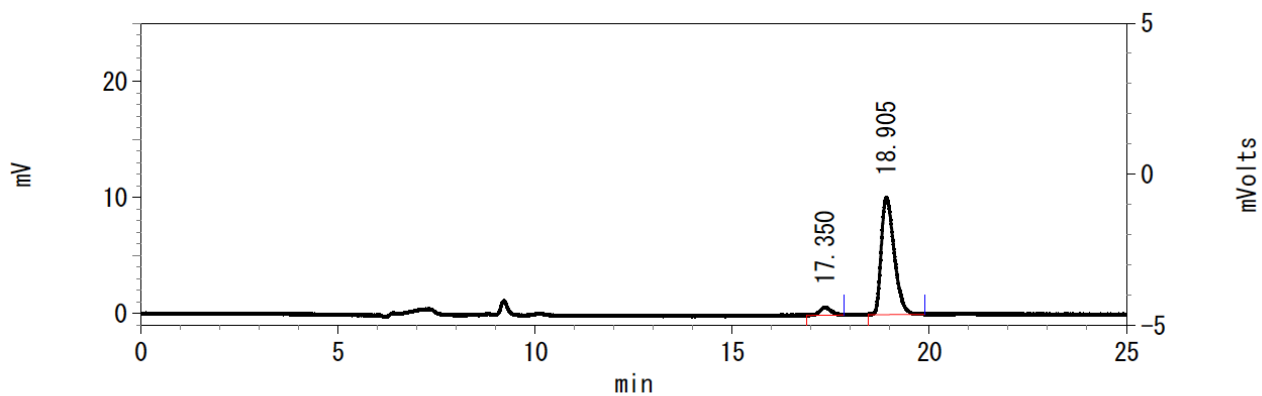

| Pk # | Retention Time | Area   | Area Percent |
|------|----------------|--------|--------------|
| 1    | 17.350         | 13463  | 5.535        |
| 2    | 18.905         | 229781 | 94.465       |

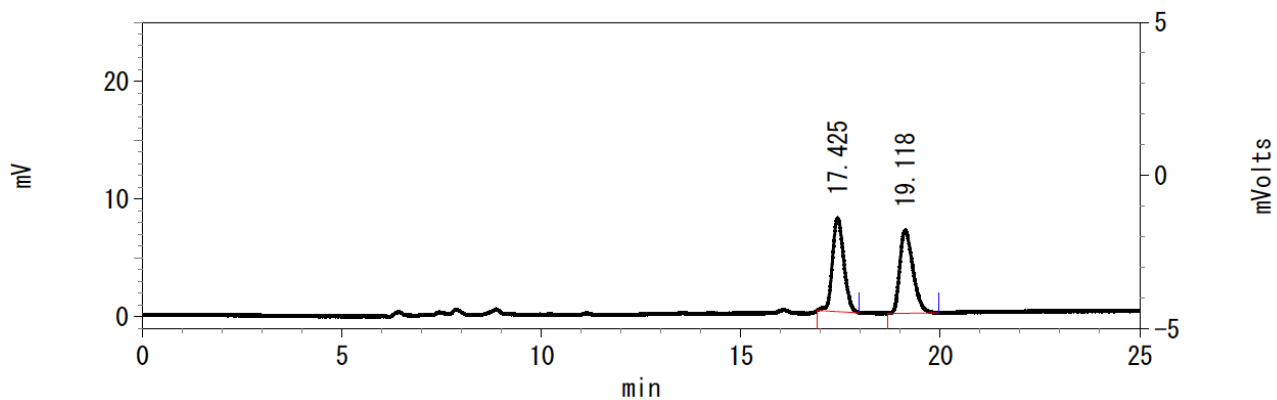

| Pk # | Retention Time | Area   | Area Percent |
|------|----------------|--------|--------------|
| 1    | 17.425         | 158152 | 49.537       |
| 2    | 19.118         | 161110 | 50.463       |



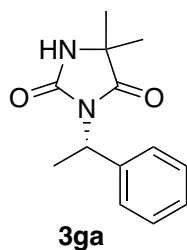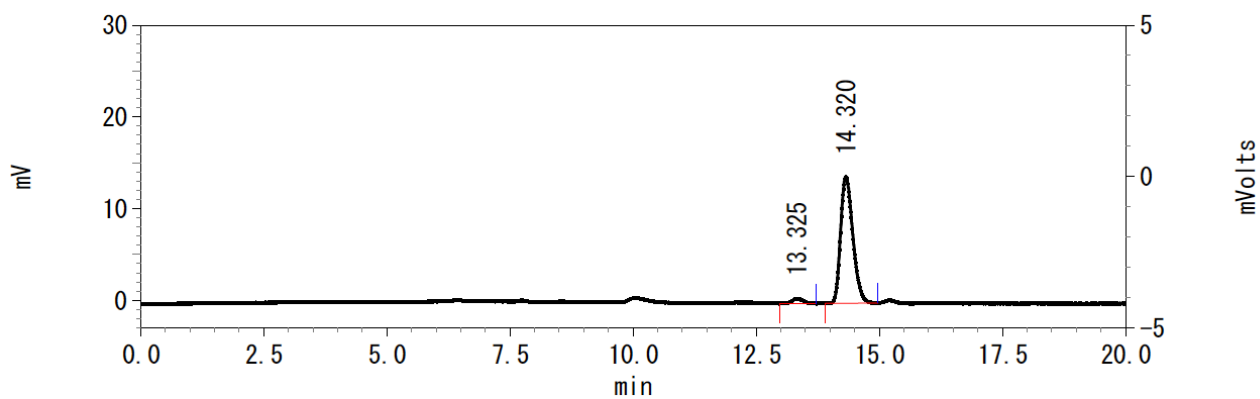

| Pk # | Retention Time | Area   | Area Percent |
|------|----------------|--------|--------------|
| 1    | 13.325         | 8901   | 3.584        |
| 2    | 14.320         | 239470 | 96.416       |

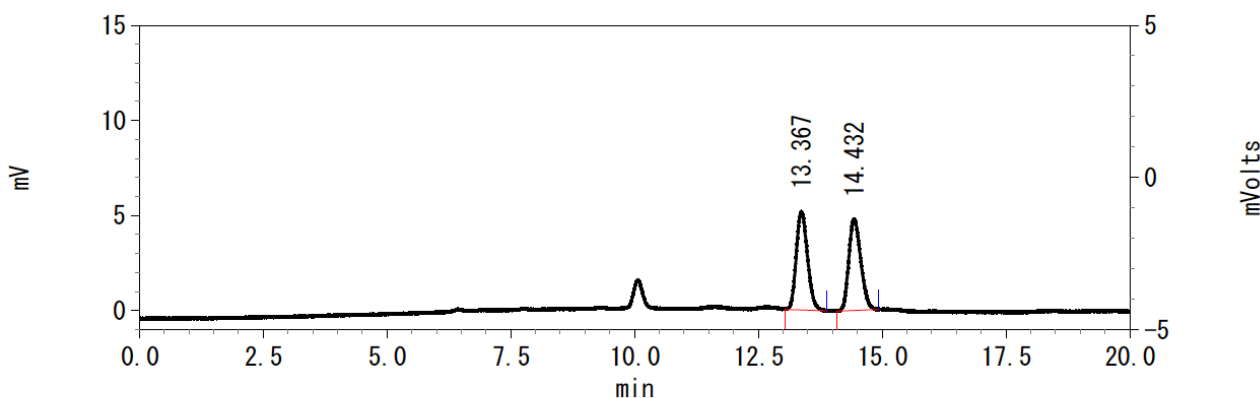

| Pk # | Retention Time | Area  | Area Percent |
|------|----------------|-------|--------------|
| 1    | 13.367         | 81656 | 50.167       |
| 2    | 14.432         | 81113 | 49.833       |

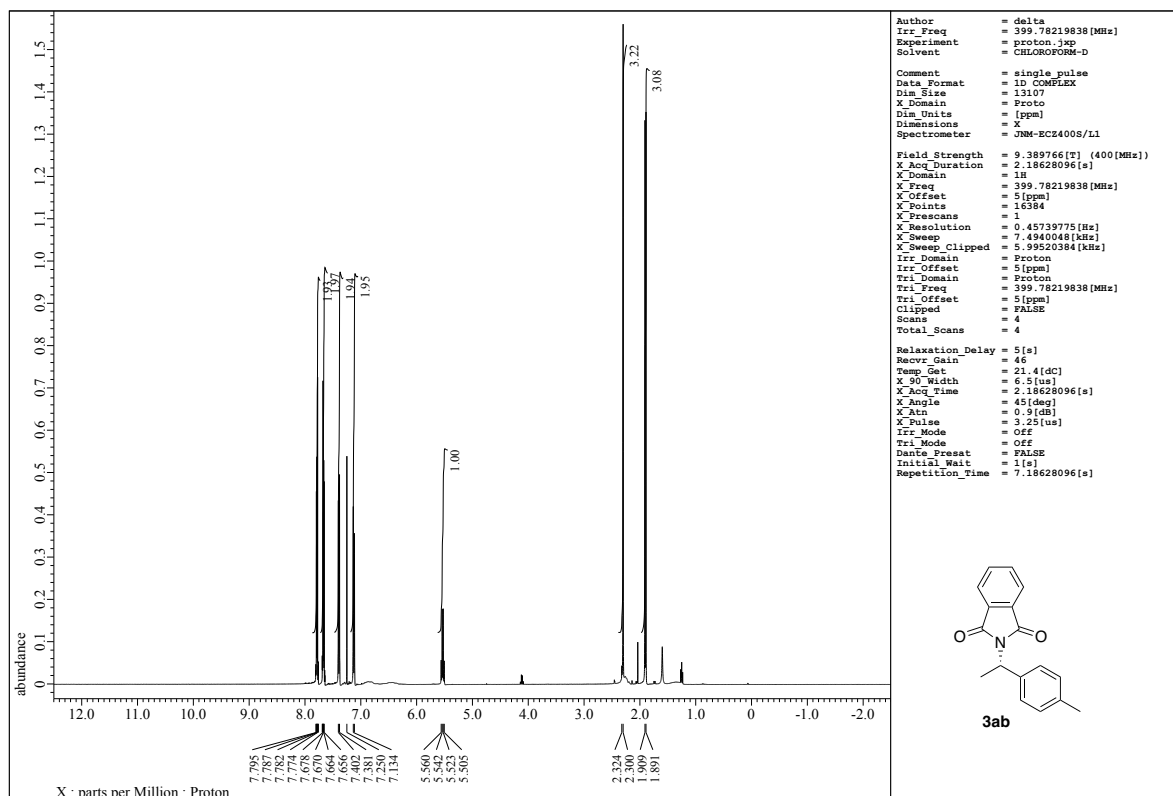

```

Author = delta
Irr_Freq = 399.78219838 [MHz]
Experiment = proton_3kp
Solvent = CHLOROFORM-D
Comment = single pulse
Data Format = 1D COMPLEX
Dim Size = 13107
X_Domain = Proton
Dim Units = [ppm]
Dimensions = X
Spectrometer = JNM-EC2400S/LI

Field Strength = 9.389766 [T] (400 [MHz])
X_Acq_Duration = 2.18628096 [s]
X_Domain = Proton
X_Freq = 399.78219838 [MHz]
X_Offset = 5 [ppm]
X_Points = 16384
X_Prescans = 1
X_Resolution = 0.45739775 [Hz]
X_Sweep = 7.4940048 [kHz]
X_Sweep_Clipped = 5.99520384 [kHz]
Irr_Domain = Proton
Irr_Offset = 5 [ppm]
Tri_Domain = Proton
Tri_Freq = 399.78219838 [MHz]
Tri_Offset = 5 [ppm]
Clipped = FALSE
Scans = 4
Total_Scans = 4

Relaxation_Delay = 5 [s]
Recvr_Gain = 46
Temp_Get = 21.4 [dC]
X_90_Width = 6.3 [us]
X_Acq_Time = 2.18628096 [s]
X_Angle = 45 [deg]
X_P1 = 0.3 [dB]
X_Pulse = 3.25 [us]
Irr_Mode = Off
Tri_Mode = Off
Dante_Presat = FALSE
Initial_Heat = 1 [s]
Repetition_Time = 7.18628096 [s]

```

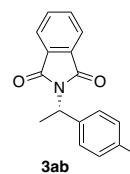



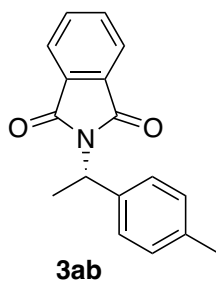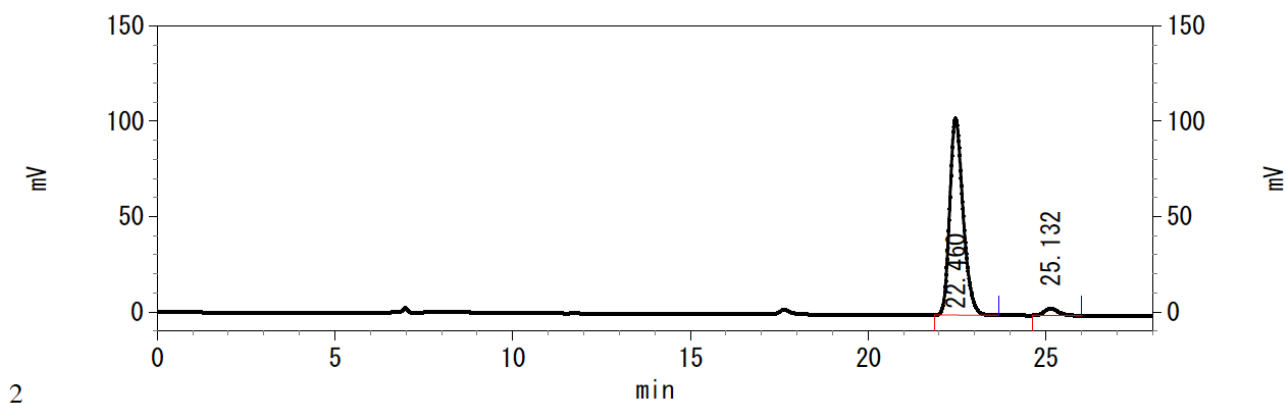

2

| Pk # | Retention Time | Area    | Area Percent |
|------|----------------|---------|--------------|
| 1    | 22.460         | 2693412 | 96.355       |
| 2    | 25.132         | 101891  | 3.645        |

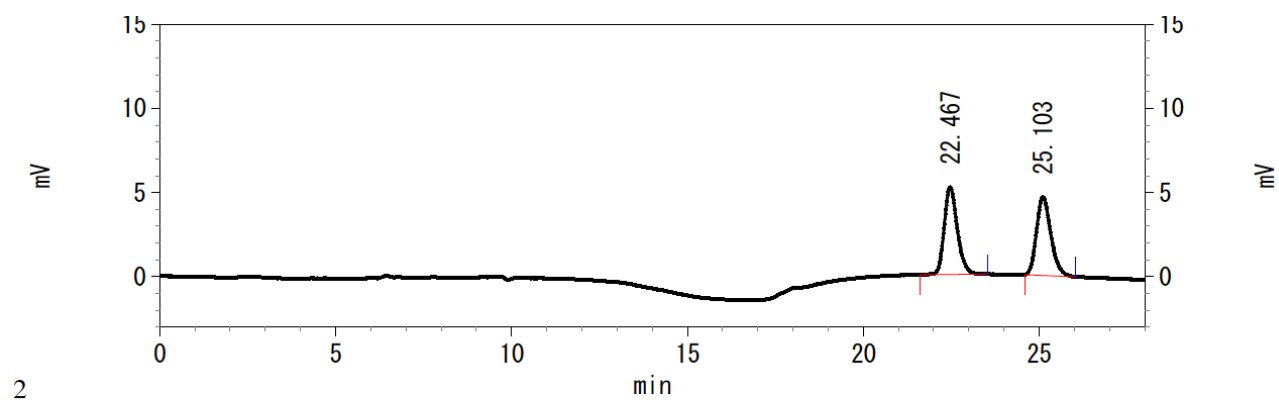

2

| Pk # | Retention Time | Area   | Area Percent |
|------|----------------|--------|--------------|
| 1    | 22.467         | 134909 | 50.506       |
| 2    | 25.103         | 132207 | 49.494       |

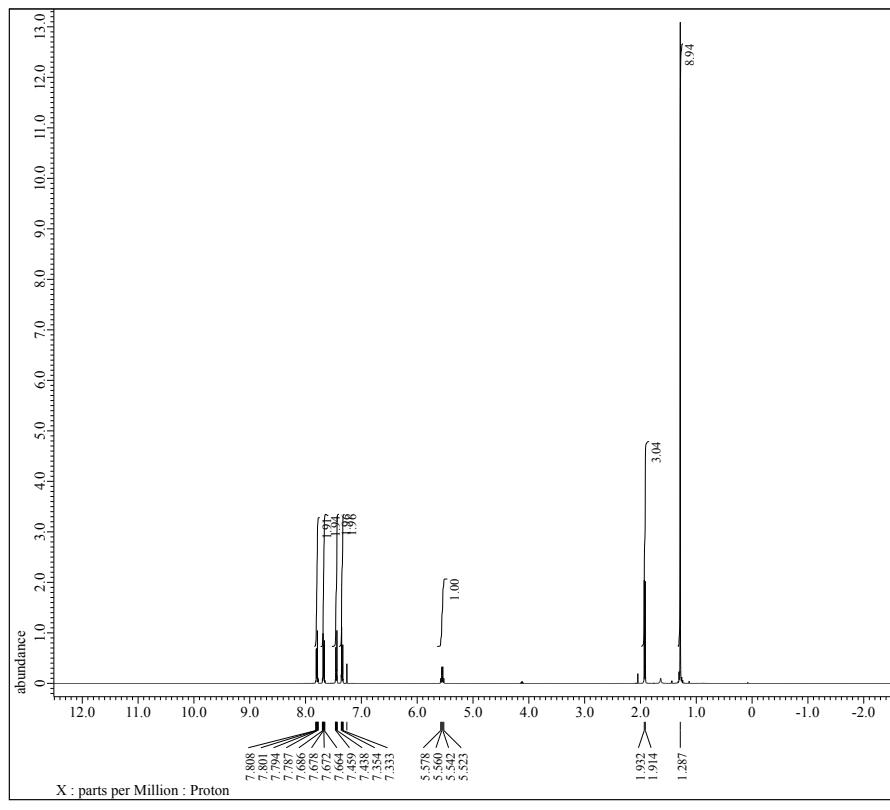

```

Author          = delta
Irr_Freq       = 399.78219838[MHz]
Experiment     = proton.jxp
Solvent        = CHLOROFORM-D
Comment        = single pulse
Data_Format    = 1D_COMPLEX
Dim_Size      = 13107
X_Domain       = Proton
Dim_Units     = [ppm]
Dimensions     = X
Spectrometer   = JNM-EC2400S/L1

Field_Strength = 9.389766[T] (400[MHz])
X_Acq_Duration = 2.18628096[s]
X_Domain       = 1H
X_Freq        = 399.78219838[MHz]
X_Offset      = 5[ppm]
X_Toints      = 16384
X_Prescans    = 1
X_Resolution  = 0.45739775[Hz]
X_Sweep       = 7.49400481[kHz]
X_Sweep_Clipped = 5.99520384[kHz]
Irr_Domain    = Proton
Irr_Offset    = 5[ppm]
Tri_Domain    = Proton
Tri_Freq      = 399.78219838[MHz]
Tri_Offset    = 5[ppm]
Clipped       = FALSE
Scans         = 4
Total_Scans   = 4

Relaxation_Delay = 5[s]
Recvr_Gain       = 46
Temp_Get         = 21.5[dc]
X_90_Width      = 6.3[us]
X_Acq_Time      = 2.18628096[s]
X_Angle         = 45[deg]
X_P1            = 0.3[us]
X_Pulse         = 3.25[us]
Irr_Mode        = Off
Tri_Mode        = Off
Dante_Presat   = FALSE
Initial_Wait    = 1[s]
Repetition_Time = 7.18628096[s]

```

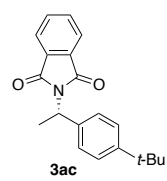

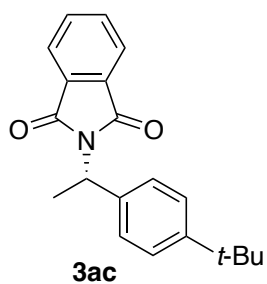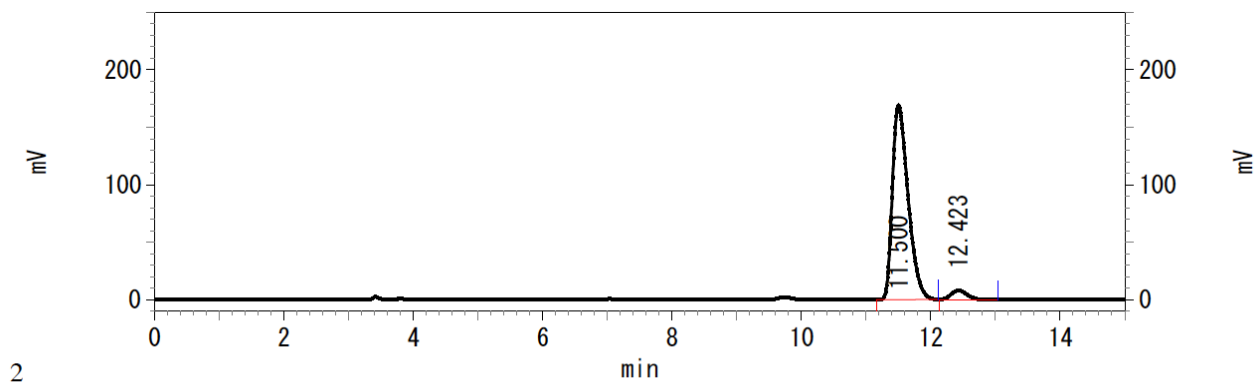

2

| Pk # | Retention Time | Area    | Area Percent |
|------|----------------|---------|--------------|
| 1    | 11.500         | 2852384 | 95.019       |
| 2    | 12.423         | 149538  | 4.981        |

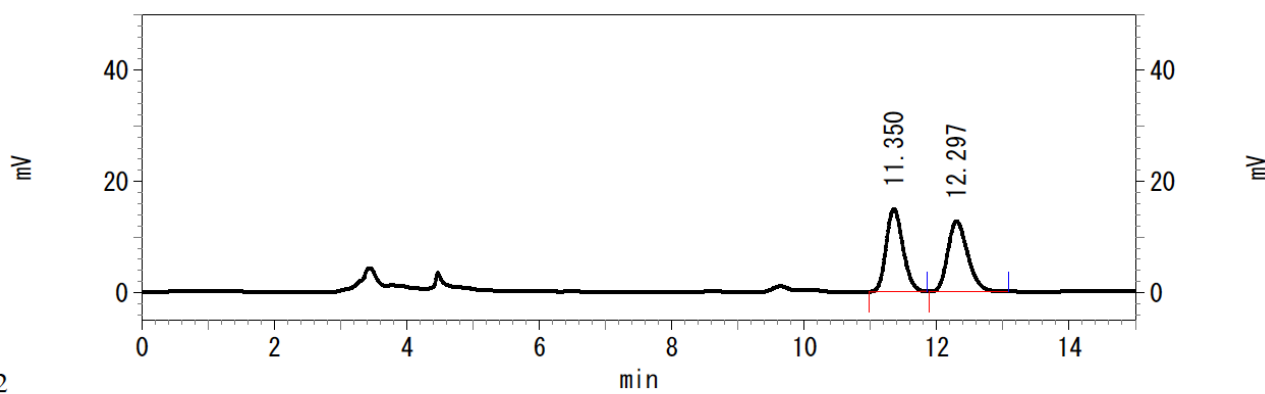

2

| Pk # | Retention Time | Area   | Area Percent |
|------|----------------|--------|--------------|
| 1    | 11.350         | 261109 | 49.761       |
| 2    | 12.297         | 263616 | 50.239       |

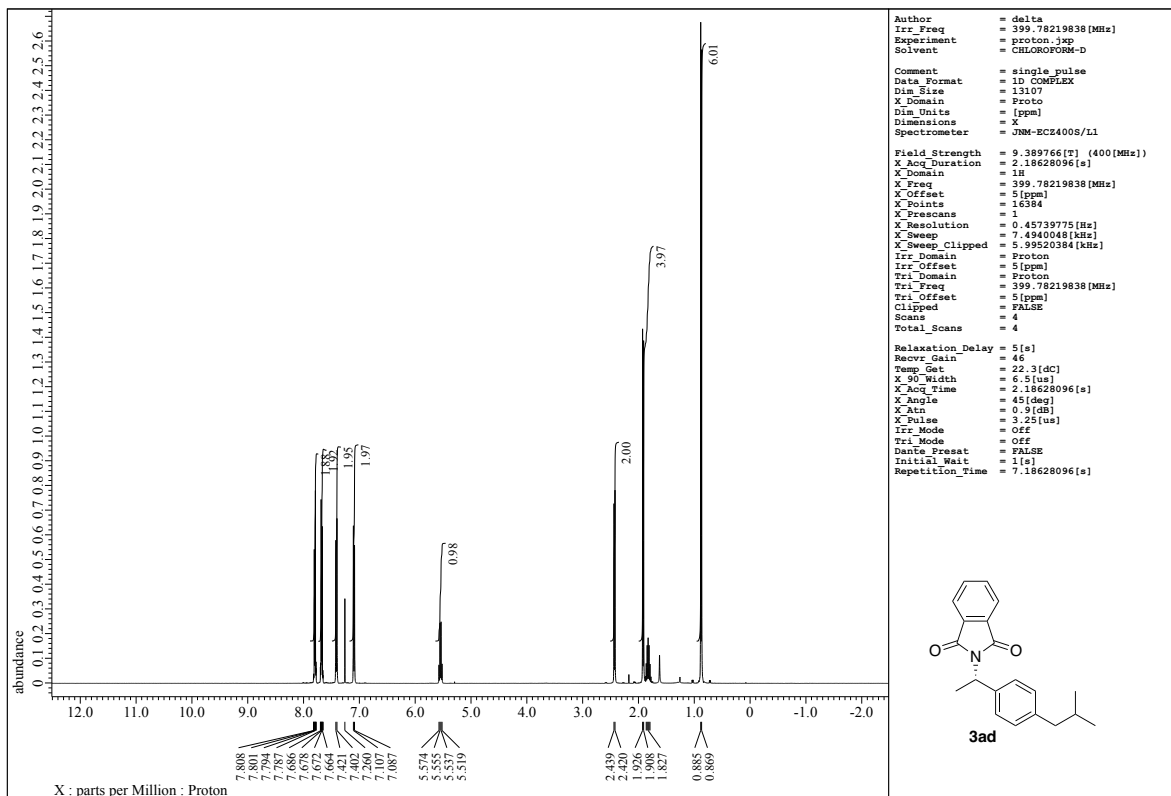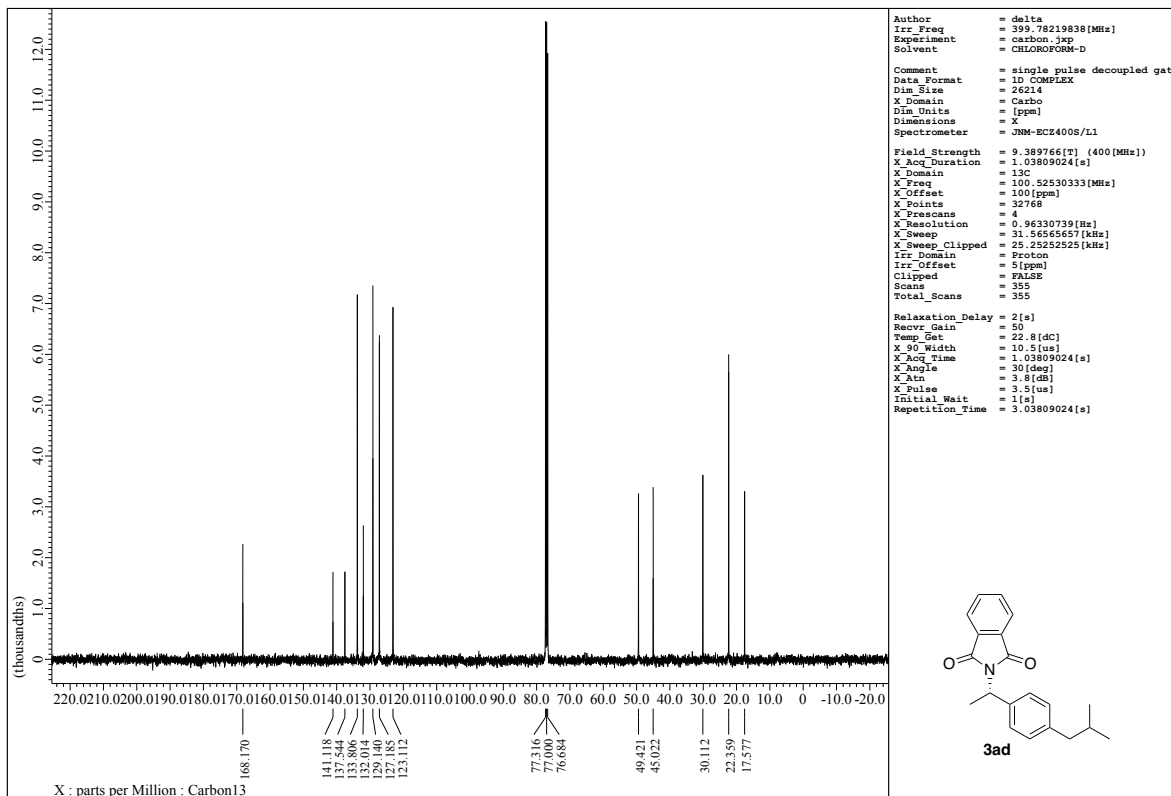

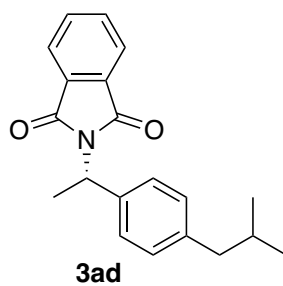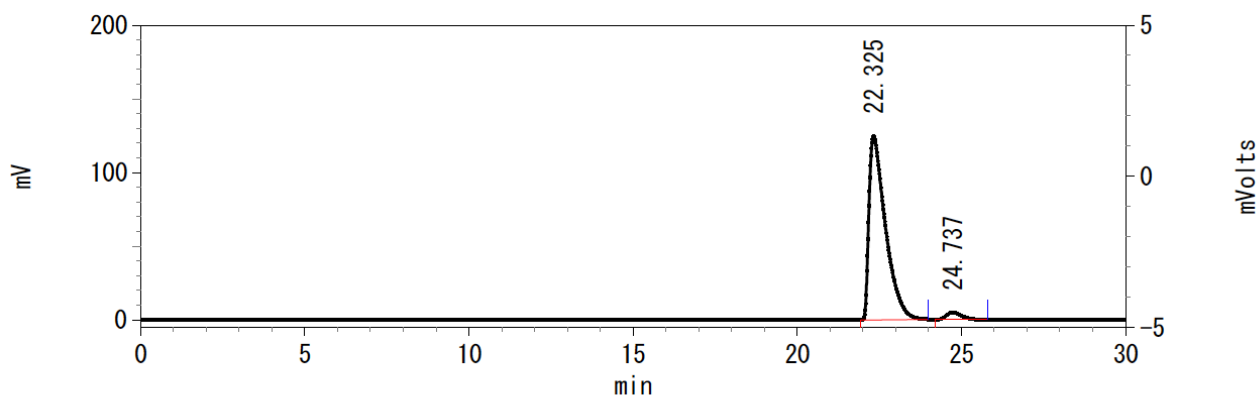

| Pk # | Retention Time | Area    | Area Percent |
|------|----------------|---------|--------------|
| 1    | 22.325         | 4352199 | 96.366       |
| 2    | 24.737         | 164108  | 3.634        |

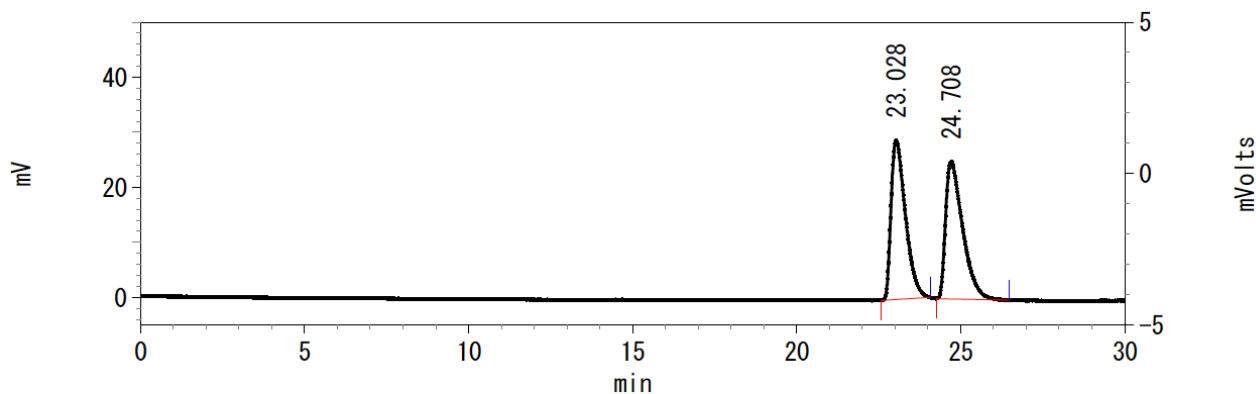

| Pk # | Retention Time | Area   | Area Percent |
|------|----------------|--------|--------------|
| 1    | 23.028         | 883939 | 49.398       |
| 2    | 24.708         | 905495 | 50.602       |

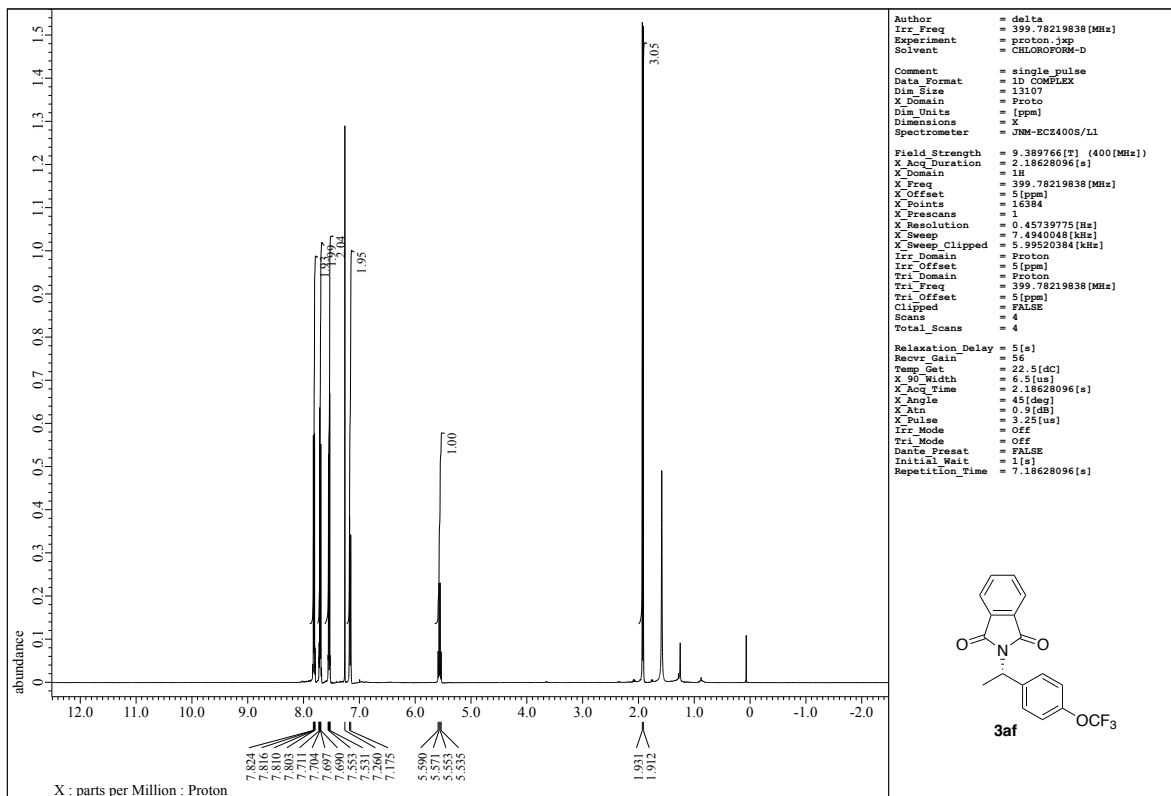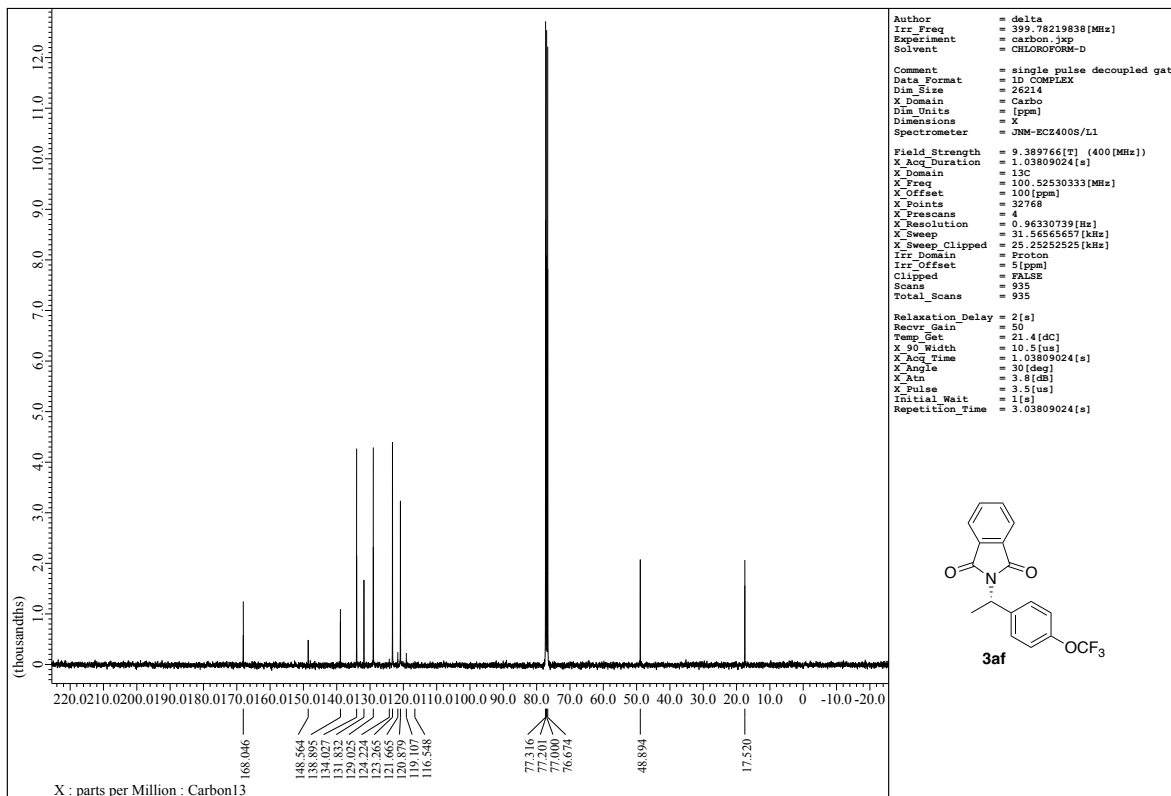

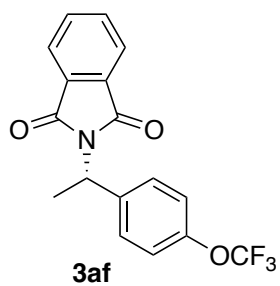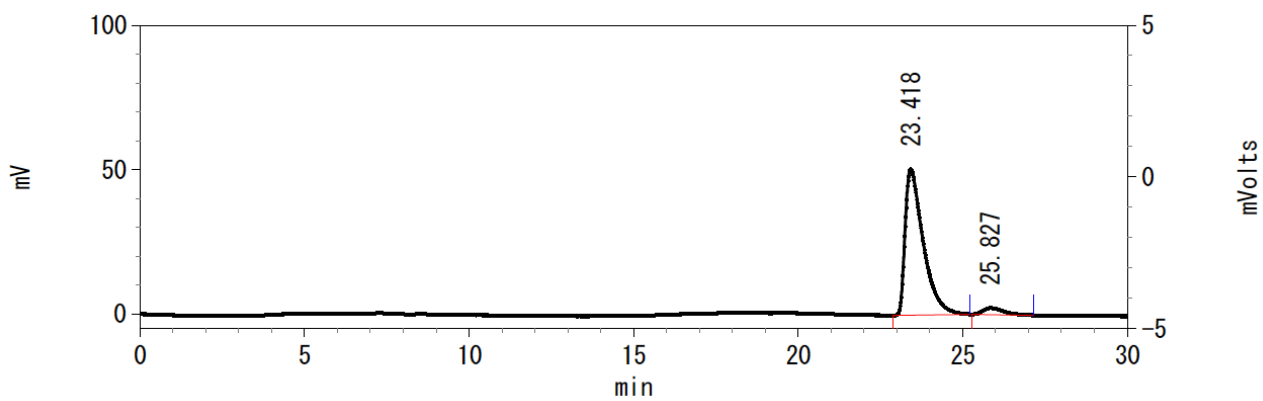

| Pk # | Retention Time | Area    | Area Percent |
|------|----------------|---------|--------------|
| 1    | 23.418         | 1936431 | 95.080       |
| 2    | 25.827         | 100200  | 4.920        |

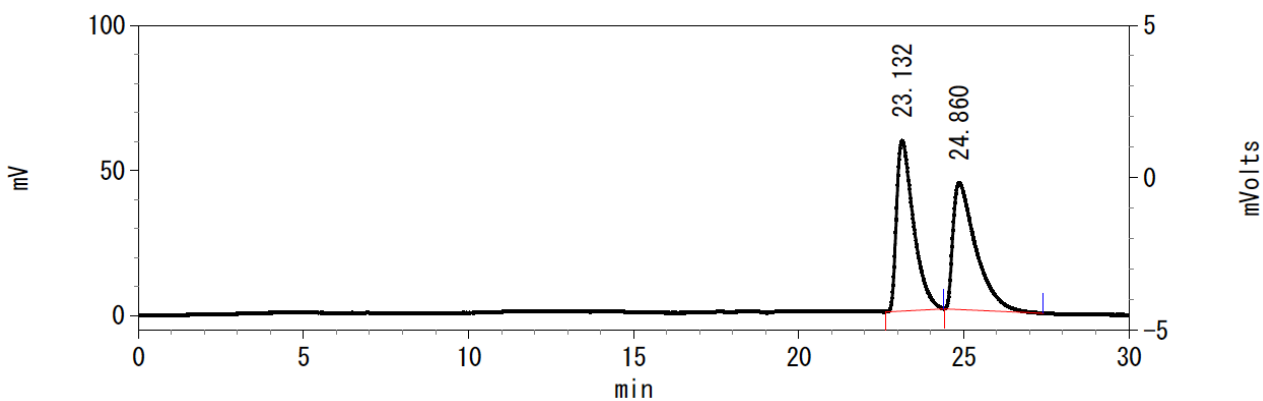

| Pk # | Retention Time | Area    | Area Percent |
|------|----------------|---------|--------------|
| 1    | 23.132         | 2099939 | 49.870       |
| 2    | 24.860         | 2110883 | 50.130       |

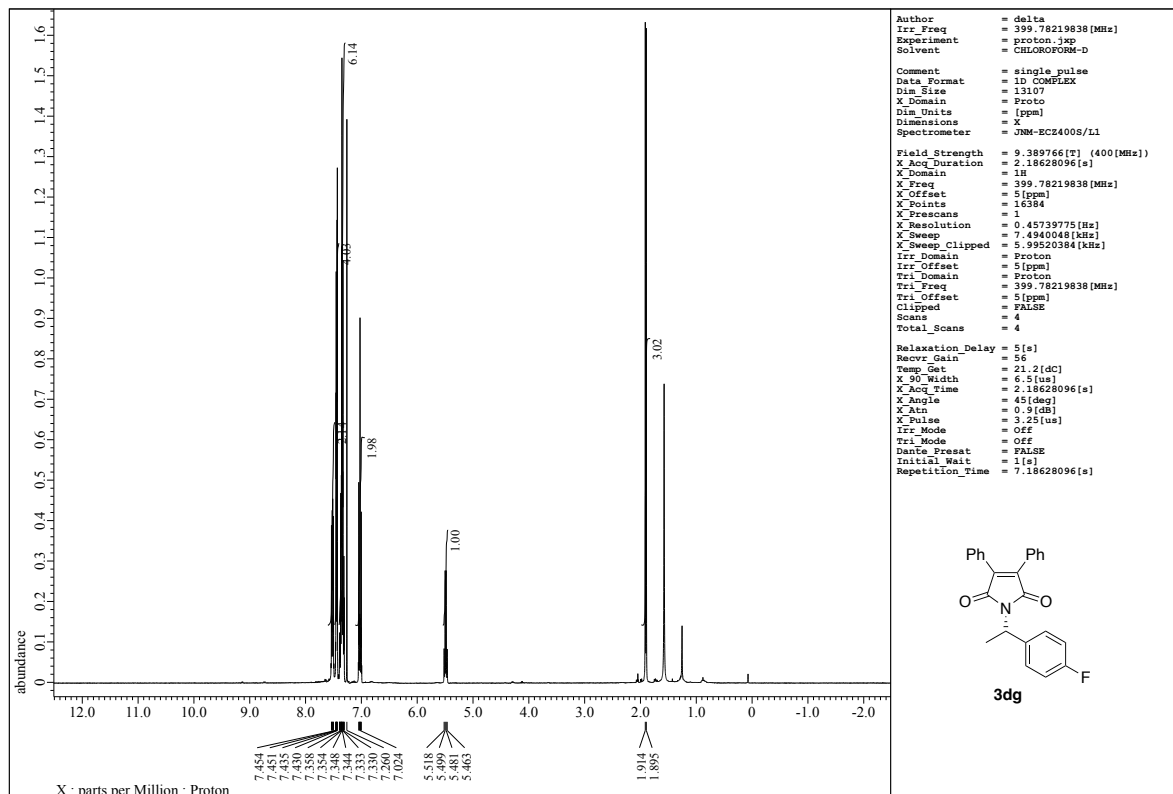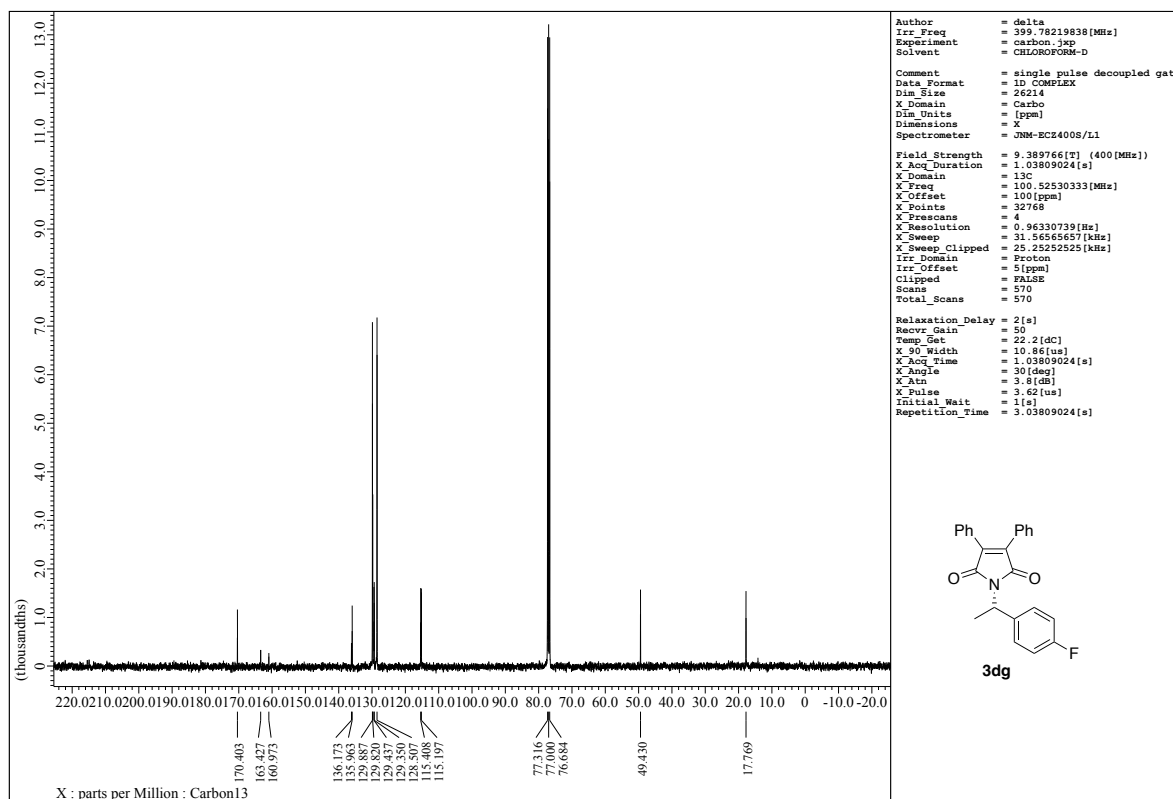



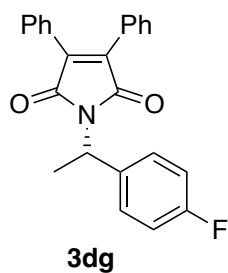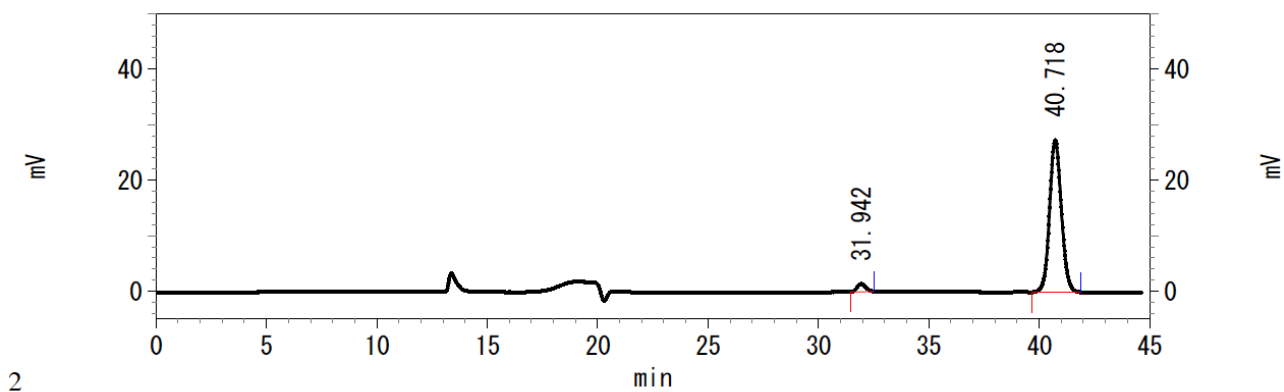

2

| Pk # | Retention Time | Area    | Area Percent |
|------|----------------|---------|--------------|
| 1    | 31.942         | 38091   | 3.595        |
| 2    | 40.718         | 1021509 | 96.405       |

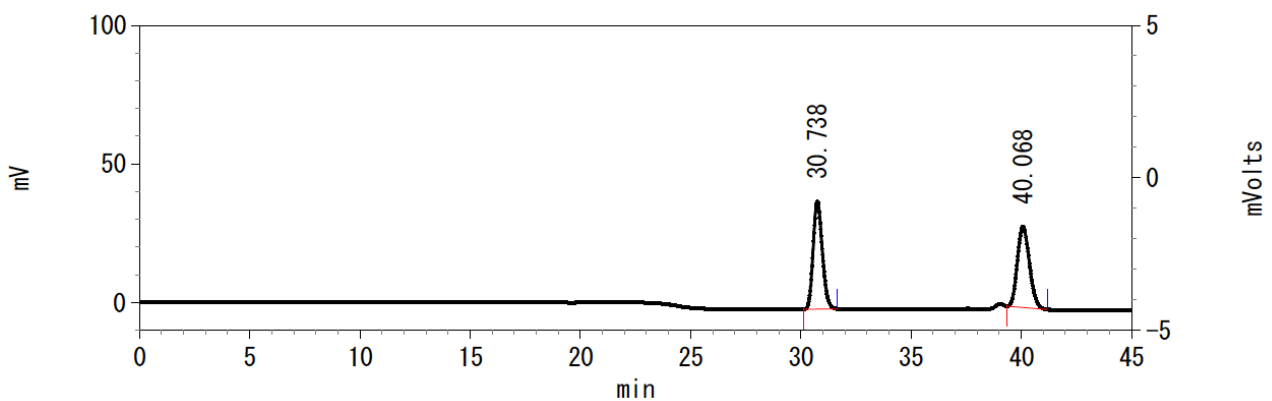

| Pk # | Retention Time | Area    | Area Percent |
|------|----------------|---------|--------------|
| 1    | 30.738         | 1131868 | 50.397       |
| 2    | 40.068         | 1114040 | 49.603       |

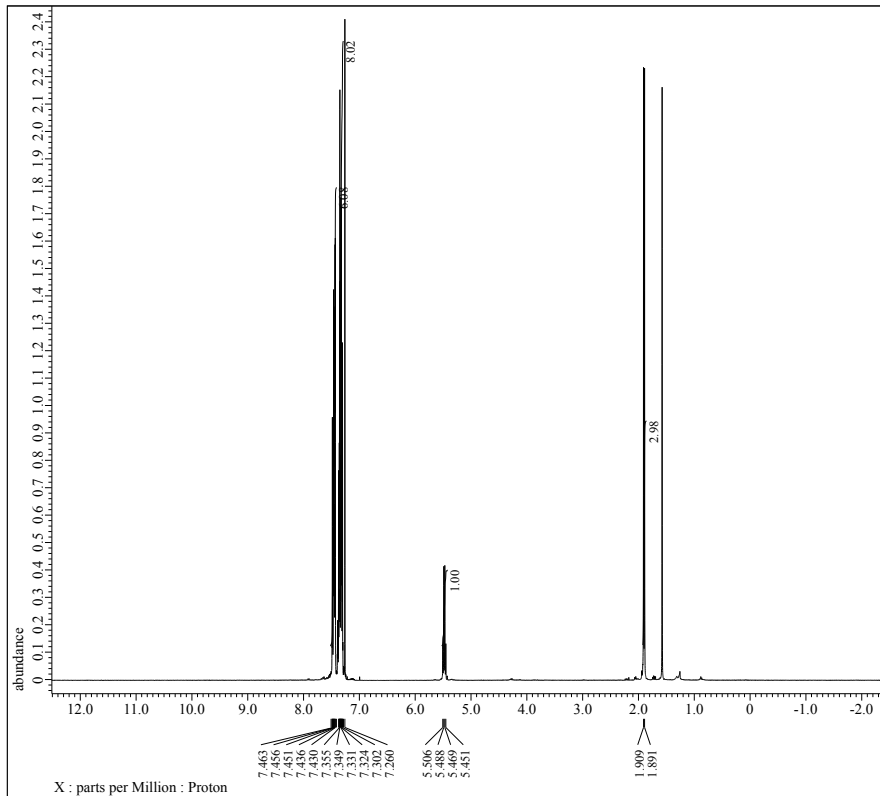

Author = delta  
 Irr\_Freq = 399.78219838 [MHz]  
 Experiment = proton\_jkp  
 Solvent = CHLOROFORM-D  
 Comment = single pulse  
 Data Format = 1D COMPLEX  
 Dim\_Size = 13107  
 X\_Domain = Proto  
 Dim\_Units = [ppm]  
 Dimensions = X  
 Spectrometer = JNM-EC2400S/LI  
 Field\_Strength = 9.389766 [T] (400 [MHz])  
 X\_Acq\_Duration = 2.18628096 [s]  
 X\_Domain = 18  
 X\_Freq = 399.78219838 [MHz]  
 X\_Offset = 5 [ppm]  
 X\_Points = 16384  
 X\_Prescans = 1  
 X\_Resolution = 0.45739775 [Hz]  
 X\_Sweep = 7.4940048 [kHz]  
 X\_Sweep\_Clipped = 5.99520384 [kHz]  
 Irr\_Domain = Proton  
 Irr\_Offset = 5 [ppm]  
 Tri\_Domain = Proton  
 Tri\_Freq = 399.78219838 [MHz]  
 Tri\_Offset = 5 [ppm]  
 Clipped = FALSE  
 Scans = 4  
 Total\_Scans = 4  
 Relaxation\_Delay = 5 [s]  
 Recvr\_Gain = 56  
 Temp\_Get = 21.5 [dc]  
 X\_90\_Width = 6.5 [us]  
 X\_Acq\_Time = 2.18628096 [s]  
 X\_Angle = 45 [deg]  
 X\_Atn = 0.3 [dB]  
 X\_Pulse = 3.25 [us]  
 Irr\_Mode = Off  
 Tri\_Mode = Off  
 Dante\_Presat = FALSE  
 Initial\_Wait = 1 [s]  
 Repetition\_Time = 7.18628096 [s]

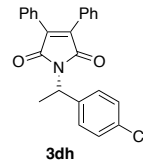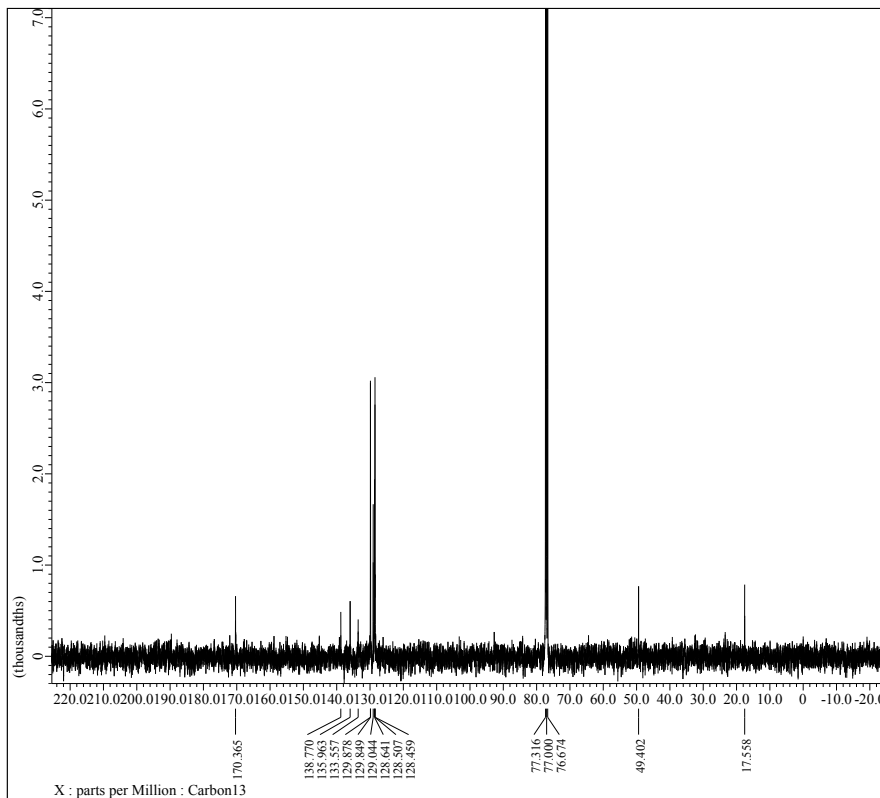

Author = delta  
 Irr\_Freq = 399.78219838 [MHz]  
 Experiment = carbon\_jkp  
 Solvent = CHLOROFORM-D  
 Comment = single pulse decoupled gat  
 Data Format = 1D COMPLEX  
 Dim\_Size = 26214  
 X\_Domain = Carbo  
 Dim\_Units = [ppm]  
 Dimensions = X  
 Spectrometer = JNM-EC2400S/LI  
 Field\_Strength = 9.389766 [T] (400 [MHz])  
 X\_Acq\_Duration = 0 [s]  
 X\_Domain = 13C  
 X\_Freq = 100.52530333 [MHz]  
 X\_Offset = 100 [ppm]  
 X\_Points = 32768  
 X\_Prescans = 4  
 X\_Resolution = 0.96330739 [Hz]  
 X\_Sweep = 31.56565657 [kHz]  
 X\_Sweep\_Clipped = 25.25252525 [kHz]  
 Irr\_Domain = Proton  
 Irr\_Offset = 5 [ppm]  
 Clipped = FALSE  
 Scans = 159  
 Total\_Scans = 159  
 Relaxation\_Delay = 2 [s]  
 Recvr\_Gain = 50  
 Temp\_Get = 19.3 [dc]  
 X\_90\_Width = 10.5 [us]  
 X\_Acq\_Time = 1.03809024 [s]  
 X\_Angle = 30 [deg]  
 X\_Atn = 3.8 [dB]  
 X\_Pulse = 3.5 [us]  
 Initial\_Wait = 1 [s]  
 Repetition\_Time = 3.03809024 [s]

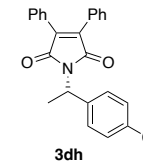

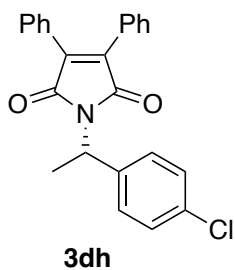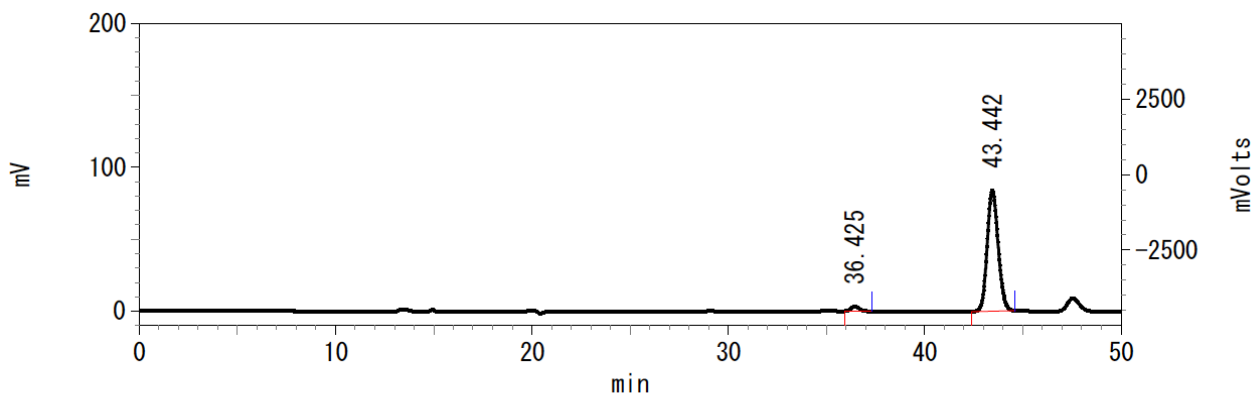

| Pk # | Retention Time | Area    | Area Percent |
|------|----------------|---------|--------------|
| 1    | 36.425         | 104543  | 3.110        |
| 2    | 43.442         | 3256699 | 96.890       |

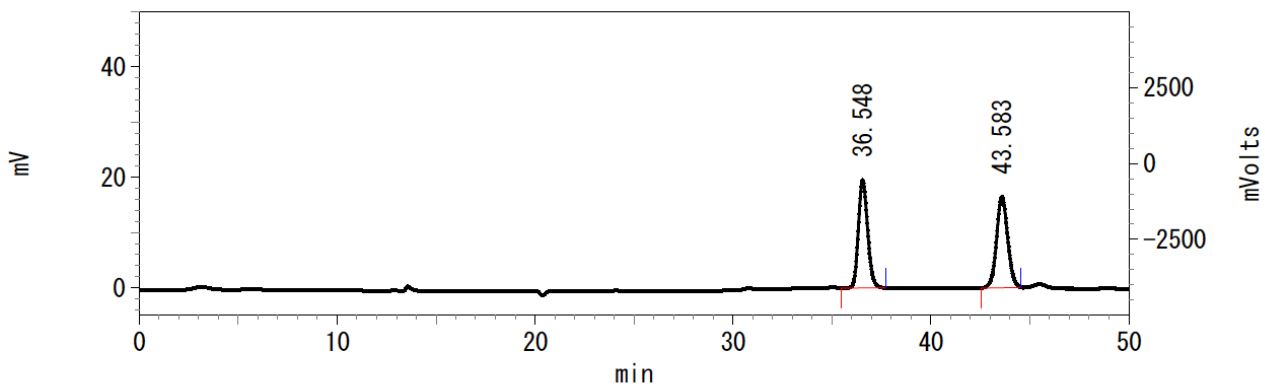

| Pk # | Retention Time | Area   | Area Percent |
|------|----------------|--------|--------------|
| 1    | 36.548         | 633092 | 49.510       |
| 2    | 43.583         | 645619 | 50.490       |

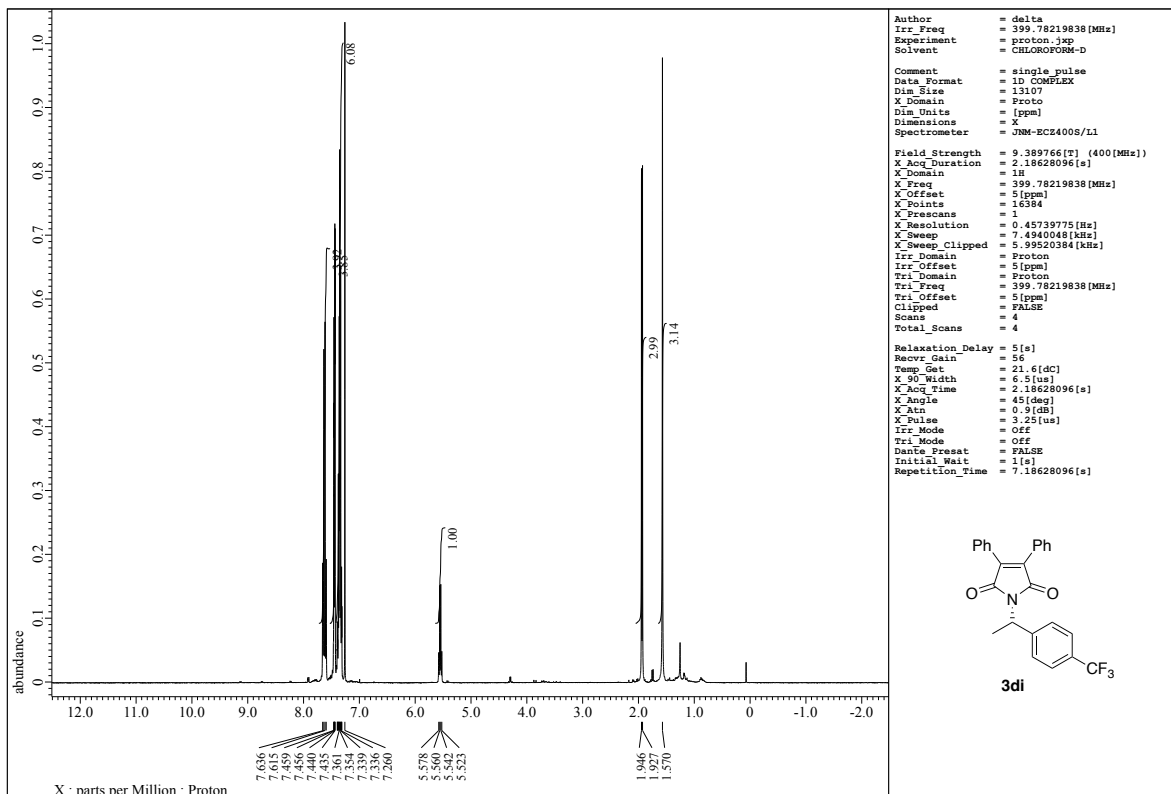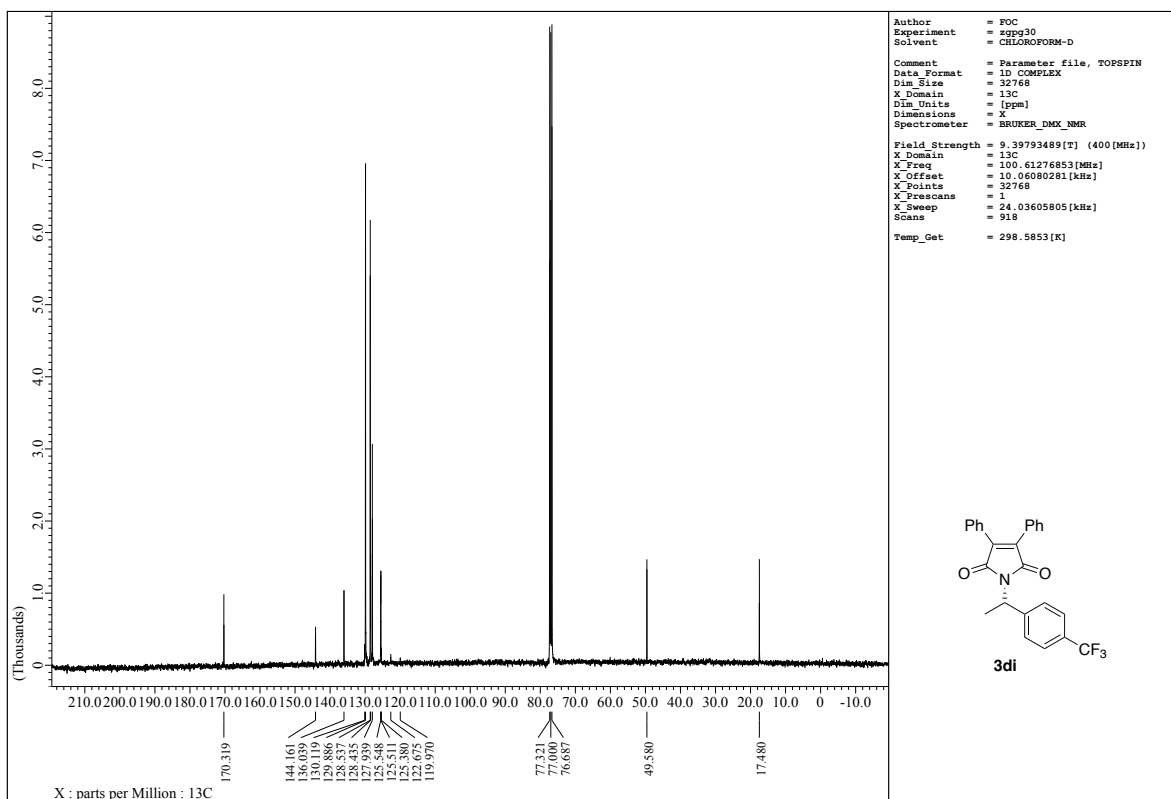

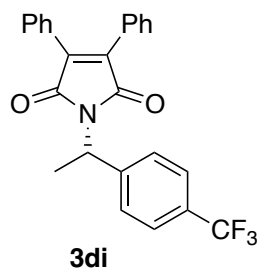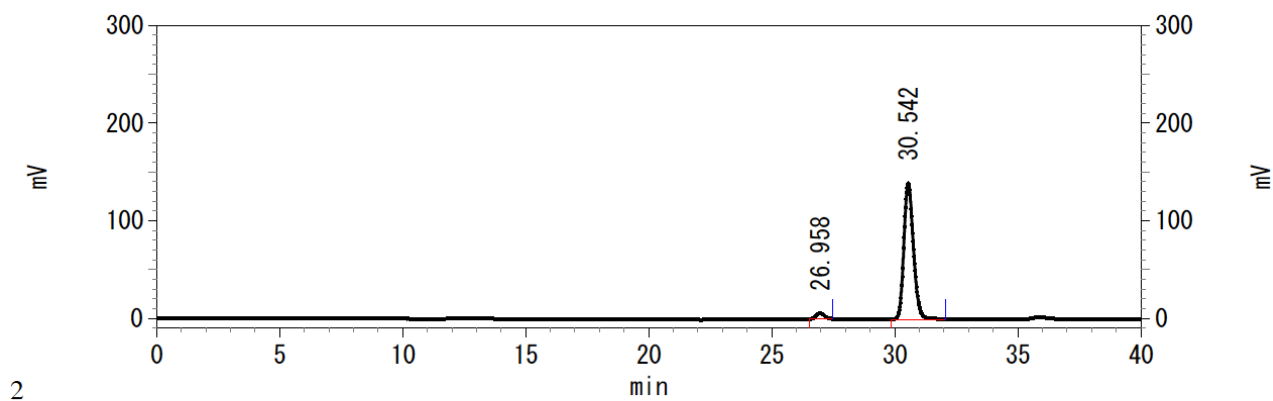

| Pk # | Retention Time | Area    | Area Percent |
|------|----------------|---------|--------------|
| 1    | 26.958         | 138684  | 3.574        |
| 2    | 30.542         | 3741559 | 96.426       |

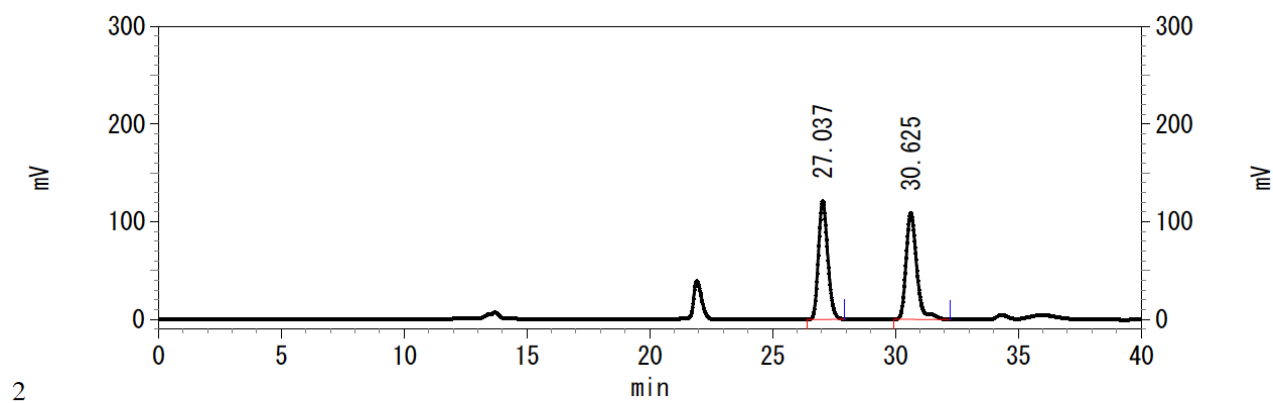

| Pk # | Retention Time | Area    | Area Percent |
|------|----------------|---------|--------------|
| 1    | 27.037         | 3201197 | 49.407       |
| 2    | 30.625         | 3277994 | 50.593       |

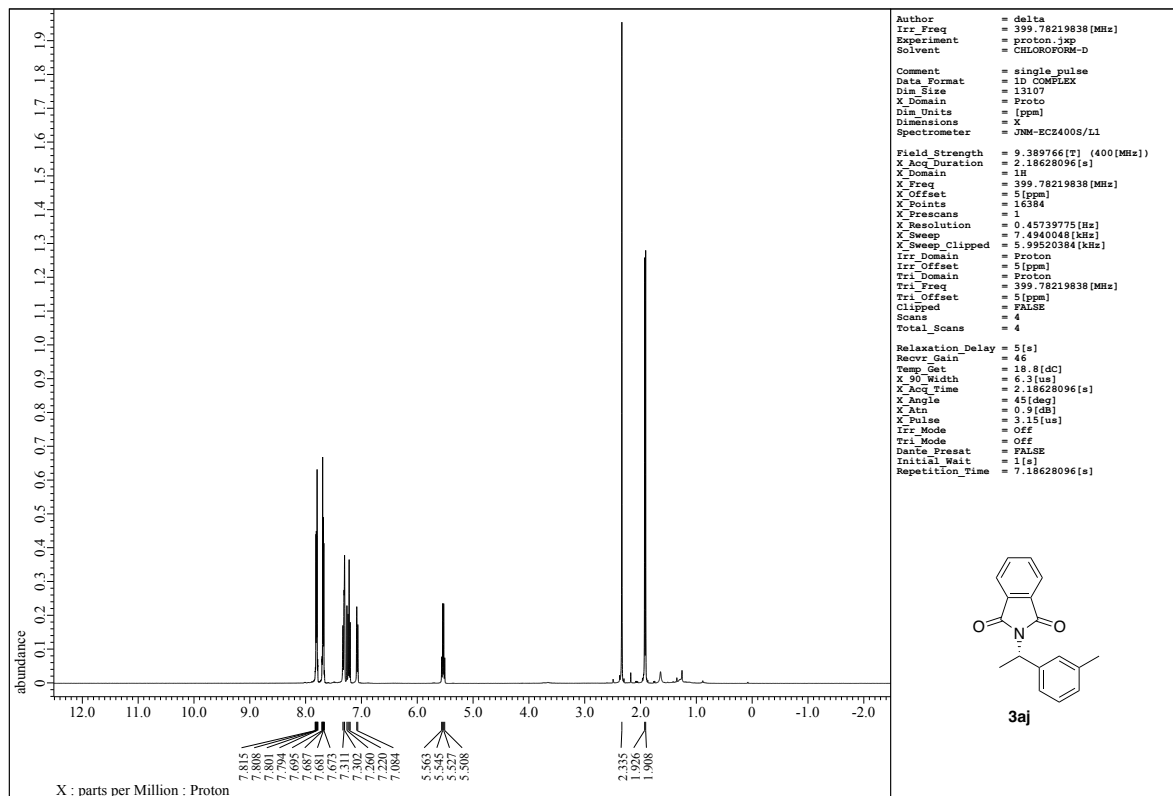

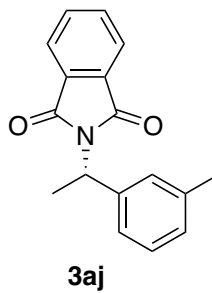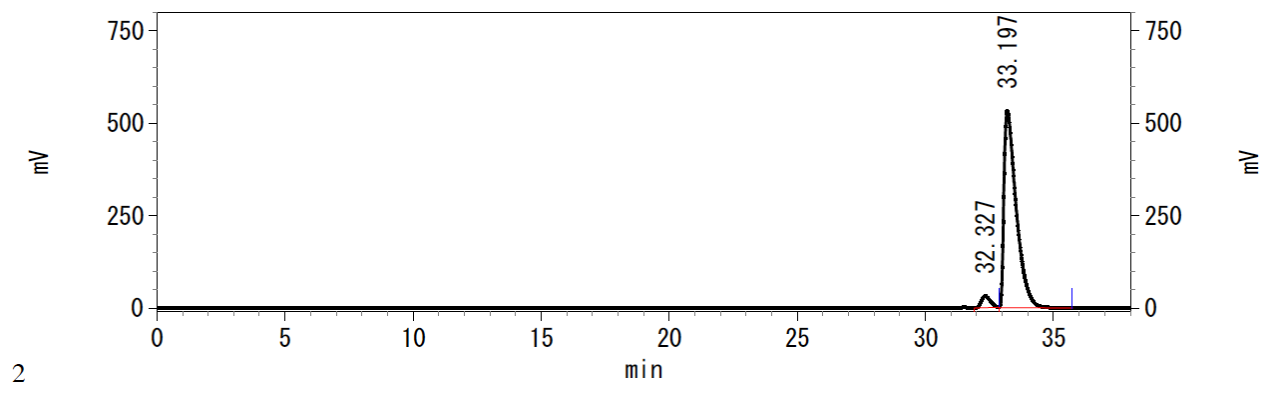

2

| Pk # | Retention Time | Area     | Area Percent |
|------|----------------|----------|--------------|
| 1    | 32.327         | 758331   | 4.109        |
| 2    | 33.197         | 17695734 | 95.891       |

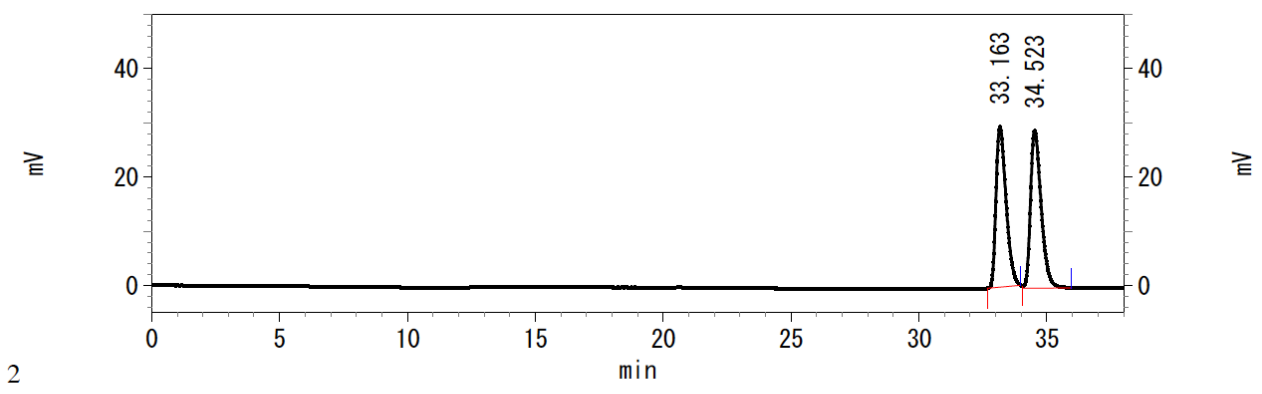

2

| Pk # | Retention Time | Area   | Area Percent |
|------|----------------|--------|--------------|
| 1    | 33.163         | 807516 | 49.049       |
| 2    | 34.523         | 838822 | 50.951       |

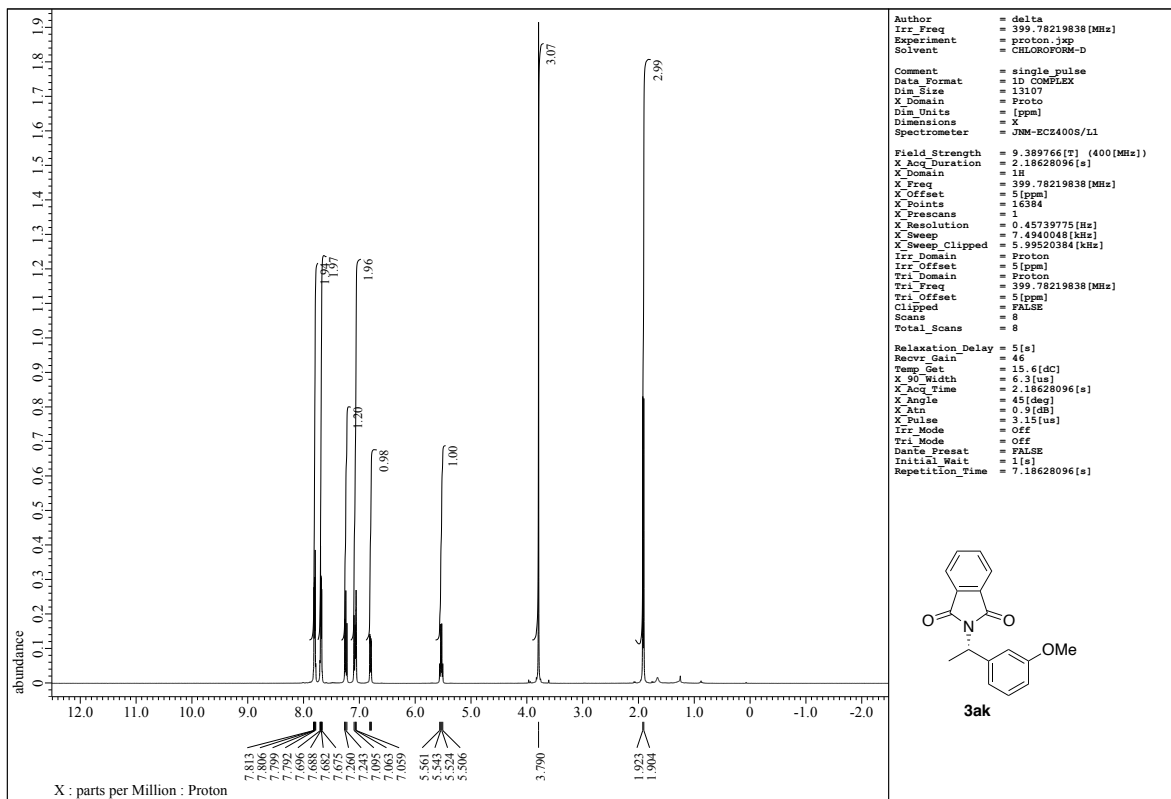



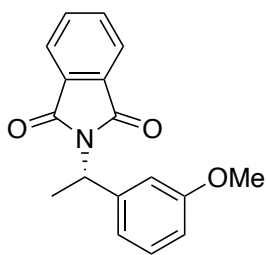

**3ak**

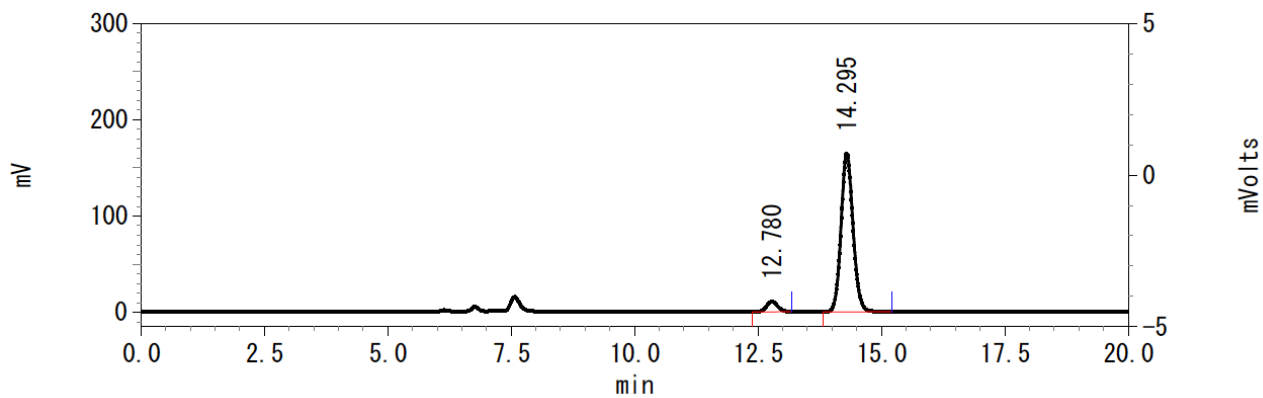

| Pk # | Retention Time | Area    | Area Percent |
|------|----------------|---------|--------------|
| 1    | 12.780         | 168097  | 5.691        |
| 2    | 14.295         | 2785583 | 94.309       |

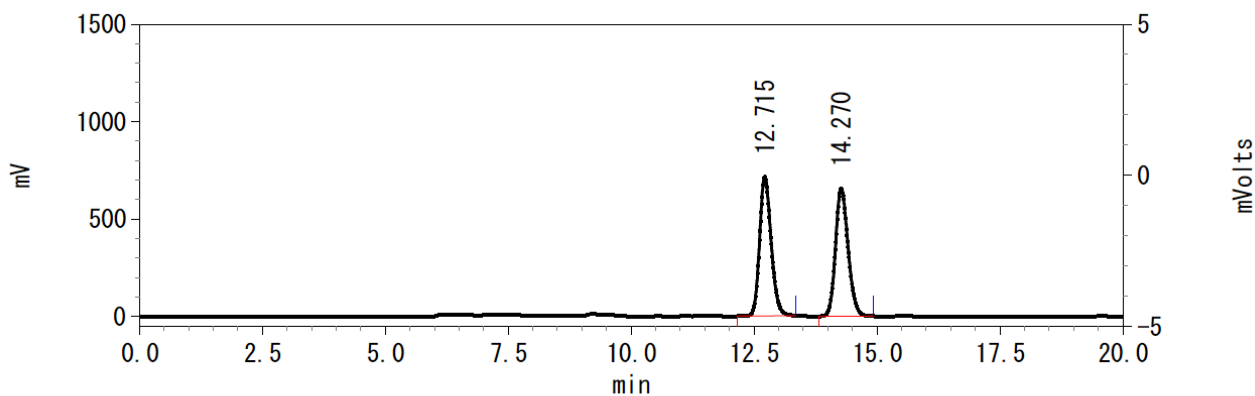

| Pk # | Retention Time | Area     | Area Percent |
|------|----------------|----------|--------------|
| 1    | 12.715         | 11675874 | 49.975       |
| 2    | 14.270         | 11687549 | 50.025       |

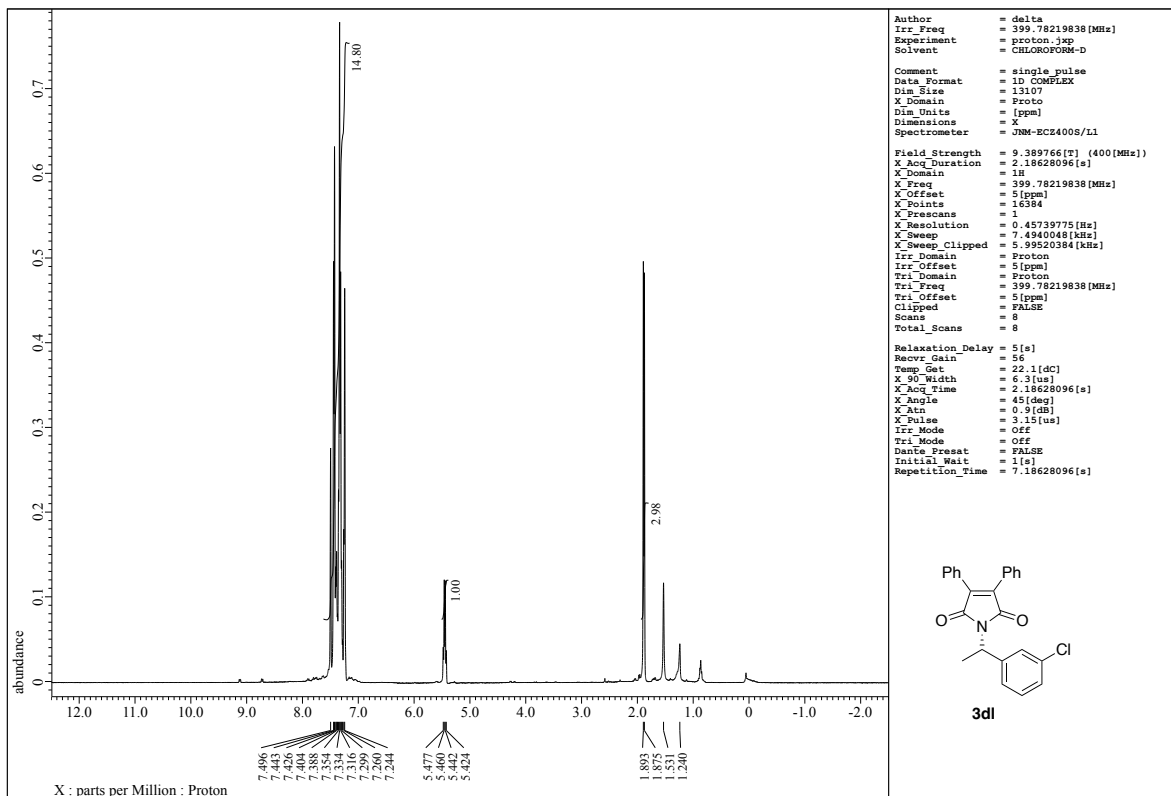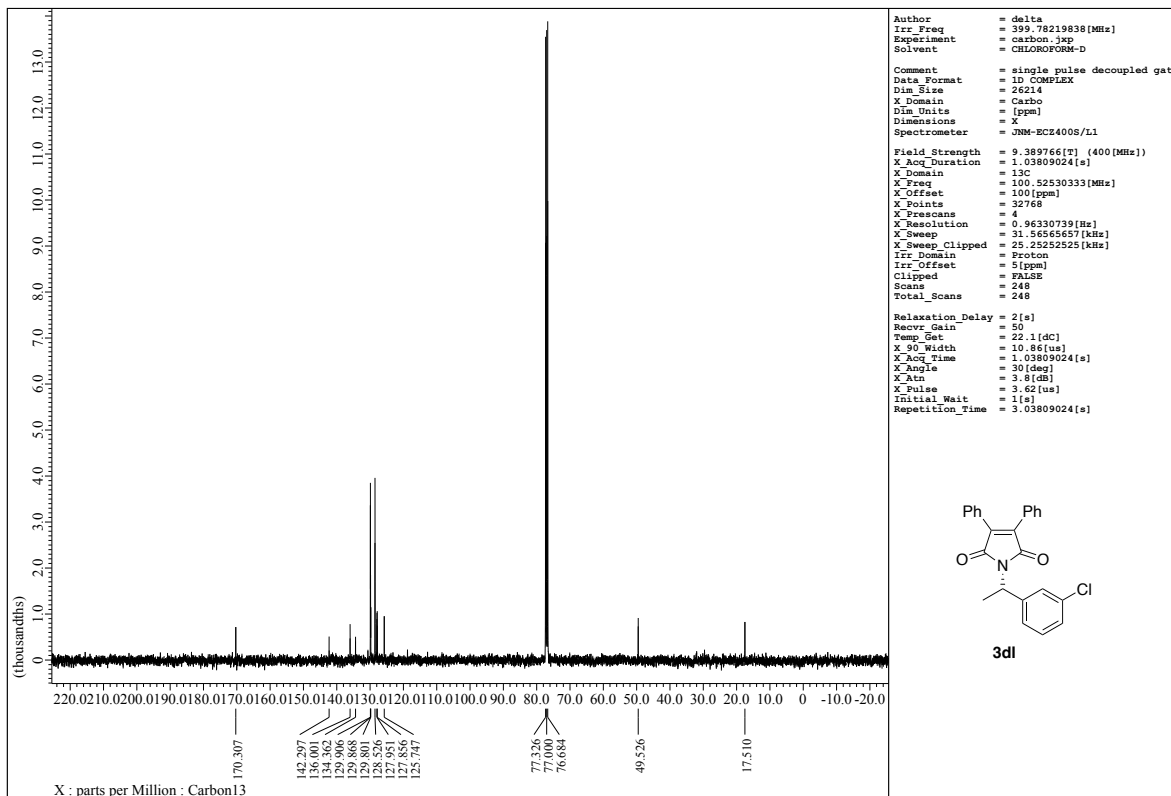

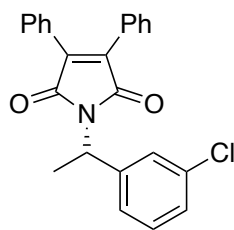

**3dl**

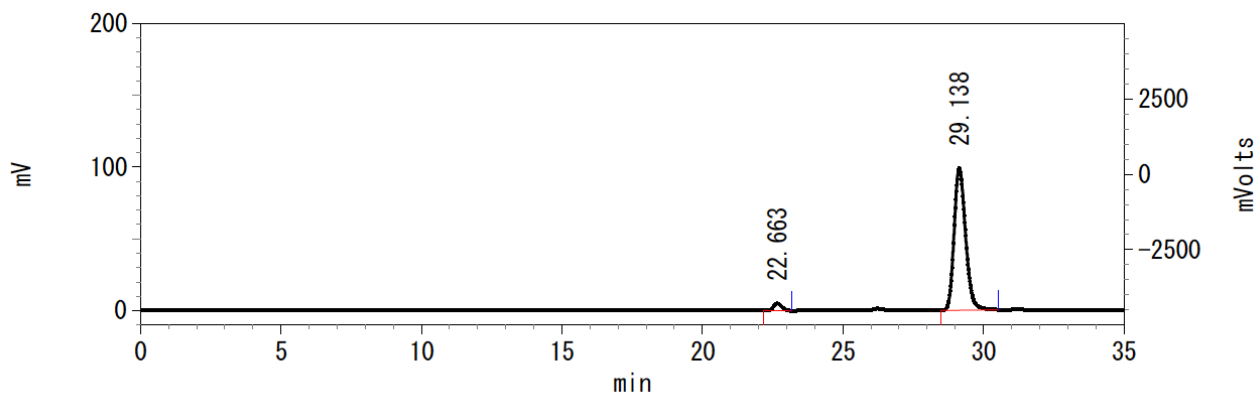

| Pk # | Retention Time | Area    | Area Percent |
|------|----------------|---------|--------------|
| 1    | 22.663         | 103030  | 3.537        |
| 2    | 29.138         | 2810302 | 96.464       |

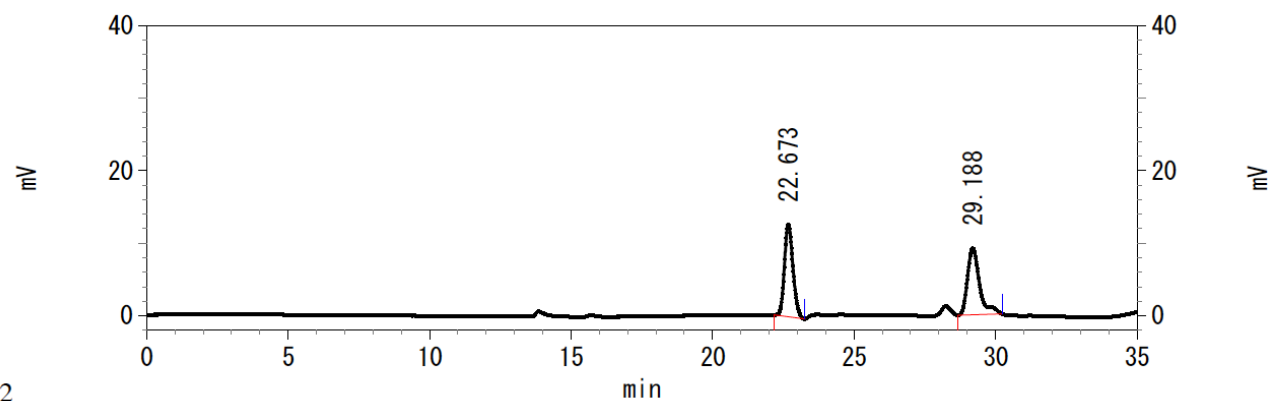

2

| Pk # | Retention Time | Area   | Area Percent |
|------|----------------|--------|--------------|
| 1    | 22.673         | 266343 | 49.516       |
| 2    | 29.188         | 271552 | 50.484       |

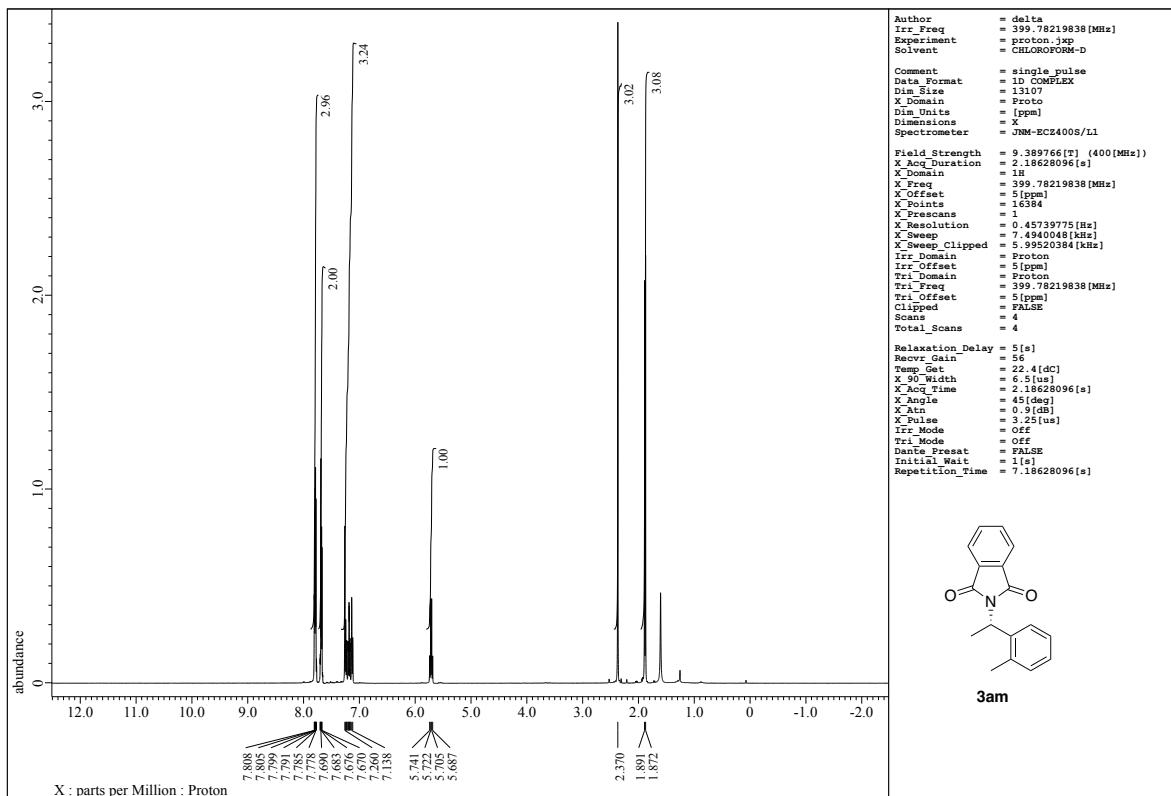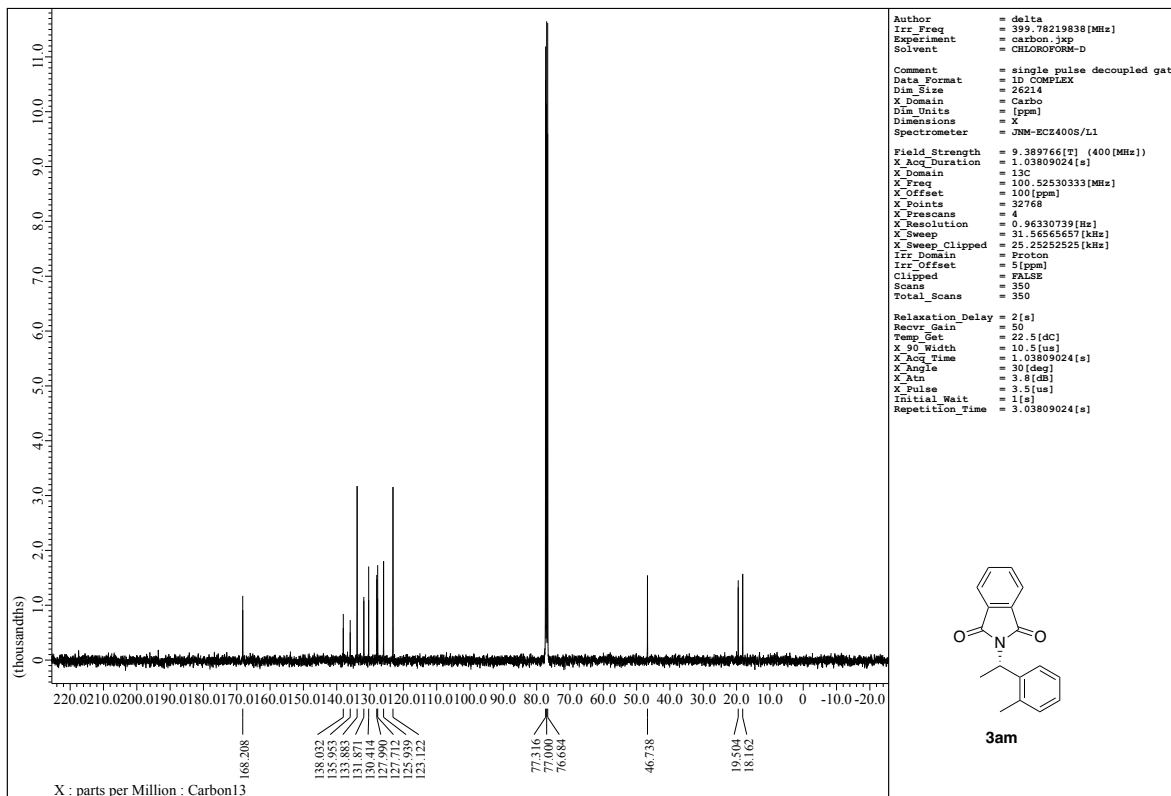

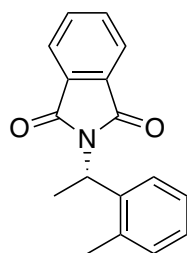

**3am**

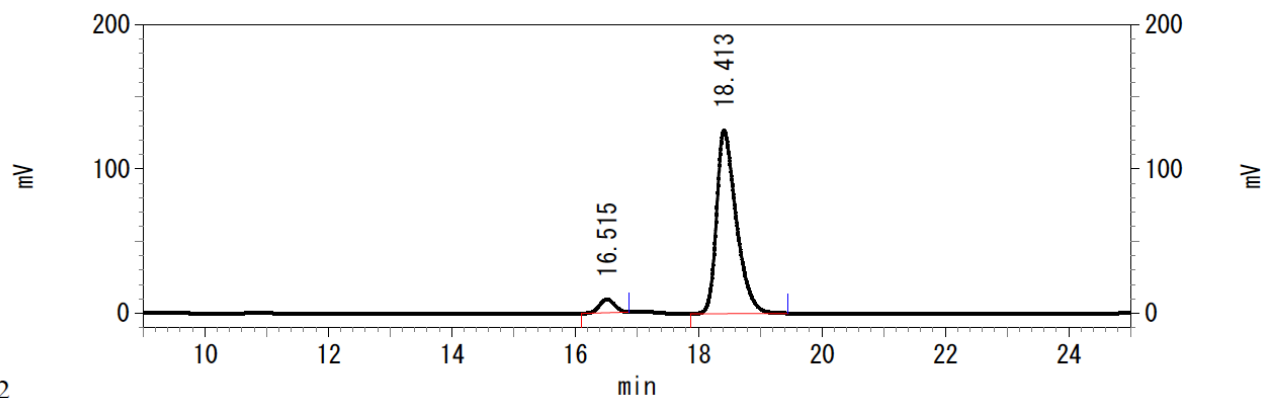

2

| Pk # | Retention Time | Area    | Area Percent |
|------|----------------|---------|--------------|
| 1    | 16.515         | 161879  | 5.440        |
| 2    | 18.413         | 2813765 | 94.560       |

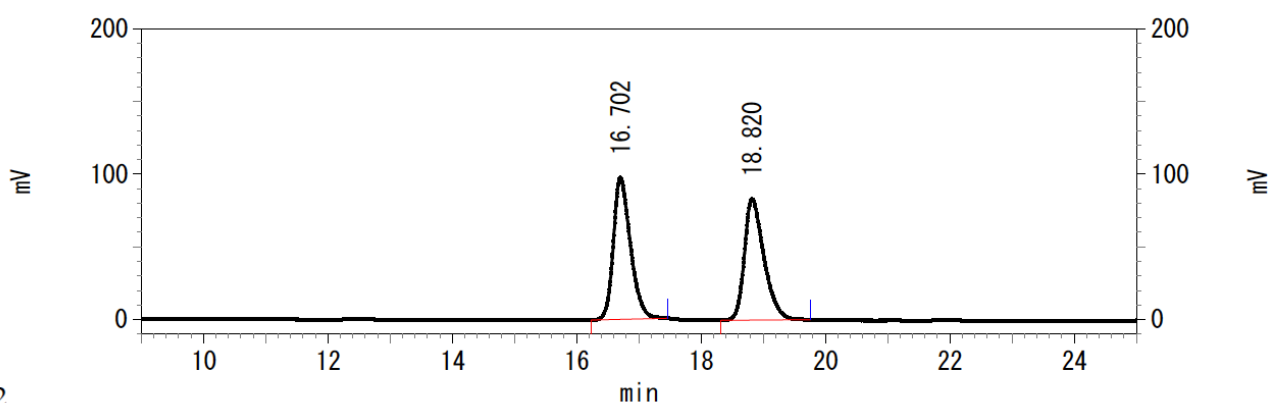

2

| Pk # | Retention Time | Area    | Area Percent |
|------|----------------|---------|--------------|
| 1    | 16.702         | 1863212 | 50.541       |
| 2    | 18.820         | 1823293 | 49.459       |

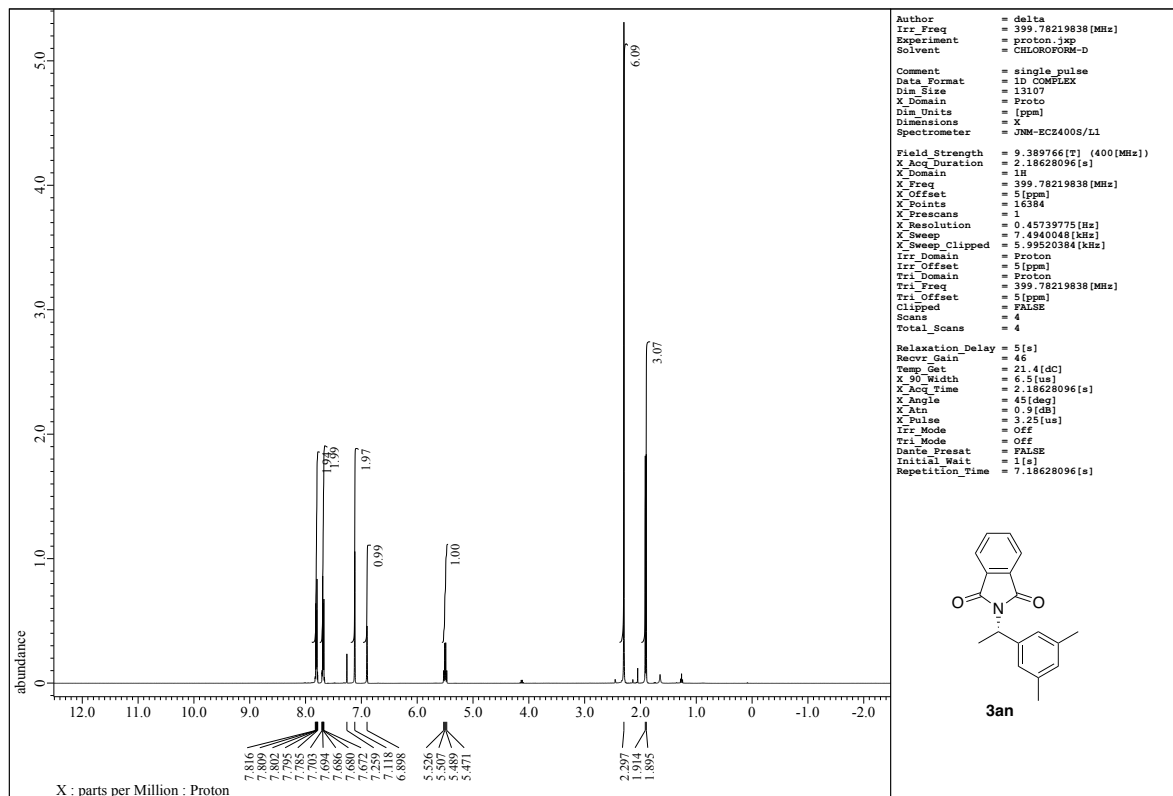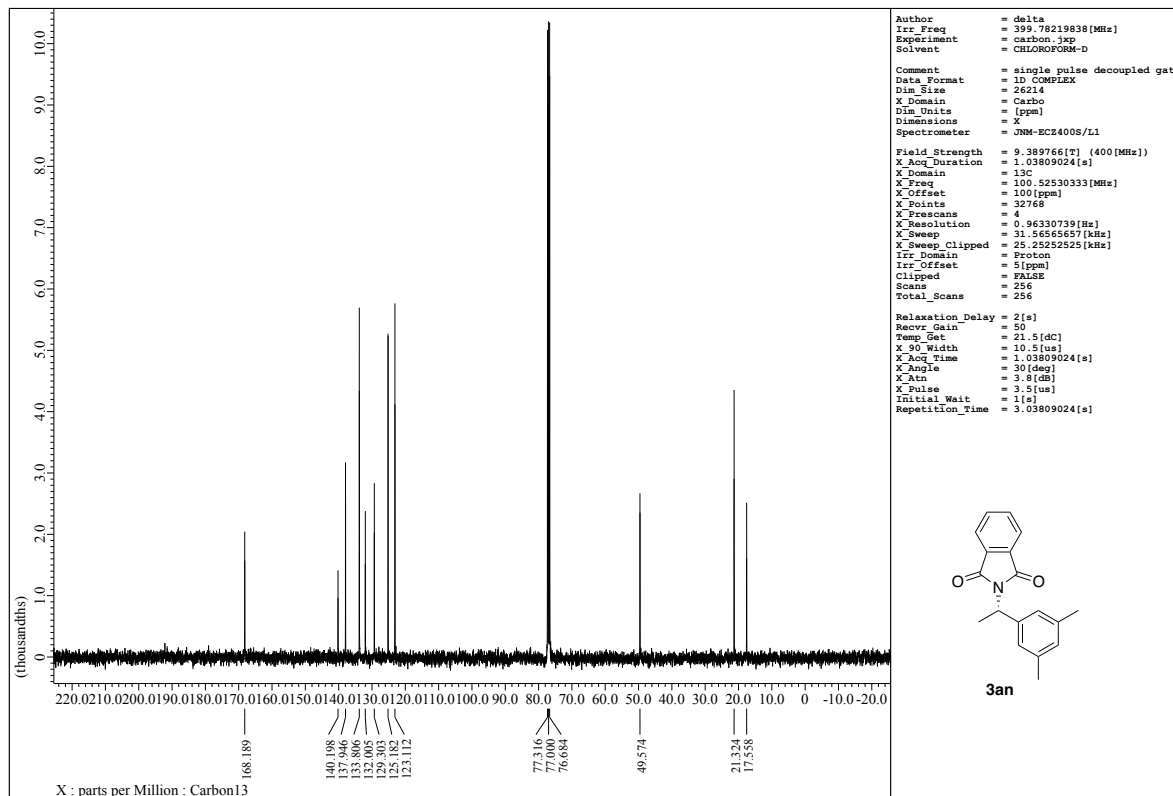

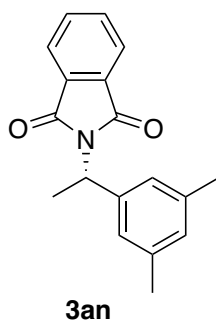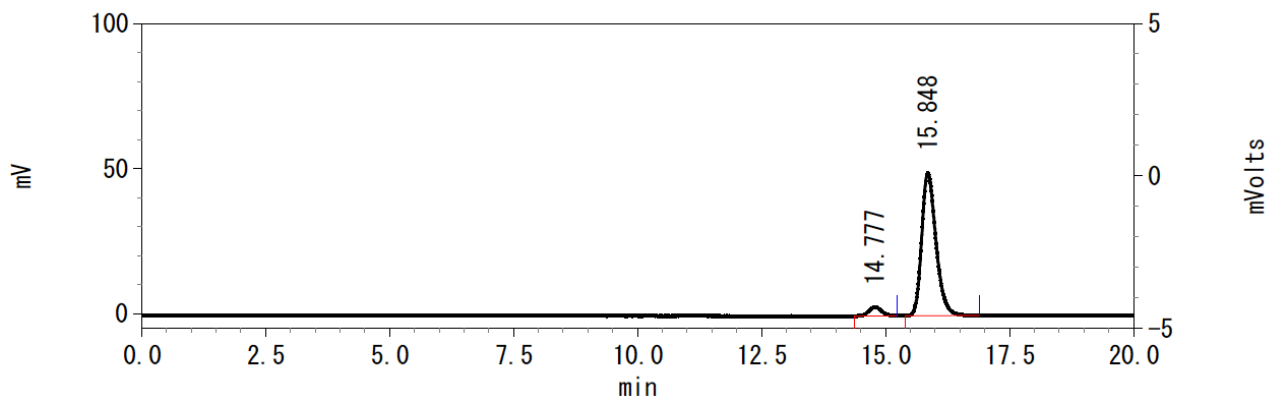

| Pk # | Retention Time | Area   | Area Percent |
|------|----------------|--------|--------------|
| 1    | 14.777         | 55876  | 5.342        |
| 2    | 15.848         | 990191 | 94.658       |

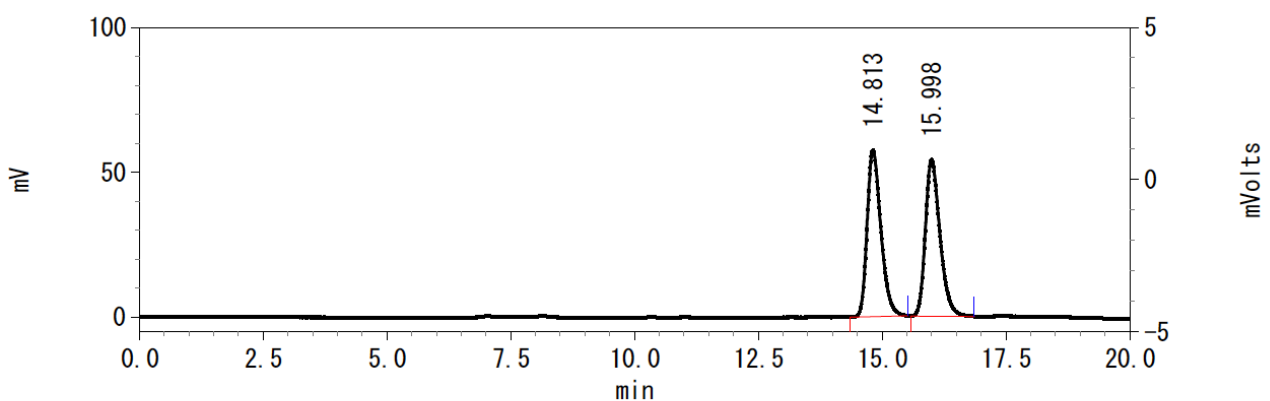

| Pk # | Retention Time | Area    | Area Percent |
|------|----------------|---------|--------------|
| 1    | 14.813         | 1113706 | 50.091       |
| 2    | 15.998         | 1109666 | 49.909       |





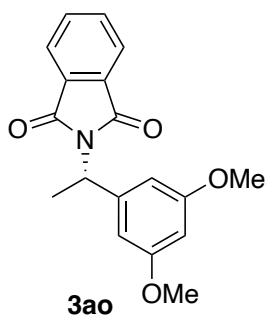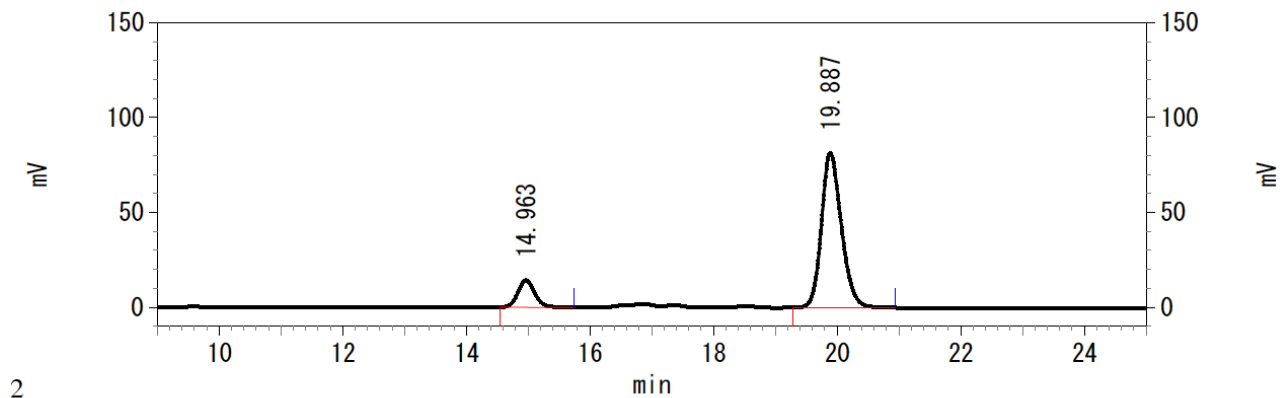

| Pk # | Retention Time | Area    | Area Percent |
|------|----------------|---------|--------------|
| 1    | 14.963         | 271578  | 12.944       |
| 2    | 19.887         | 1826539 | 87.056       |

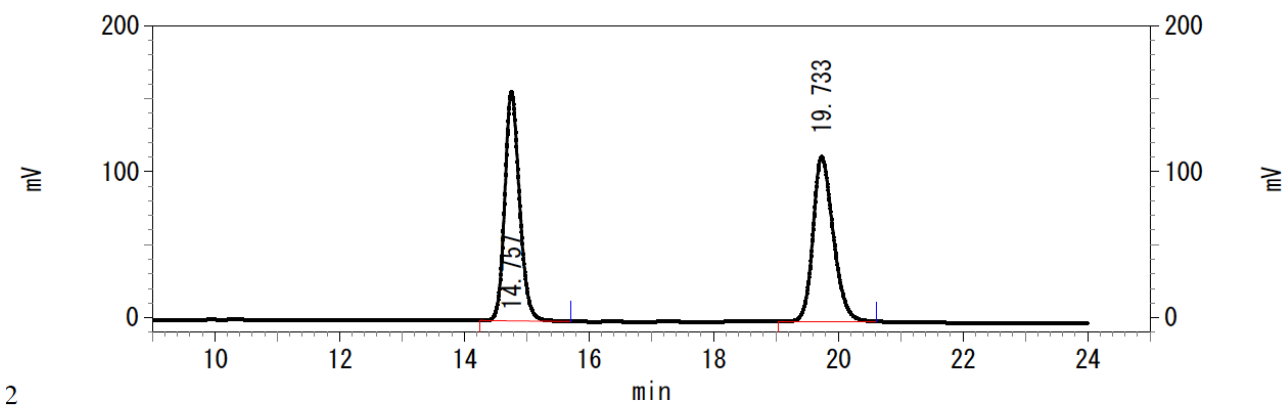

| Pk # | Retention Time | Area    | Area Percent |
|------|----------------|---------|--------------|
| 1    | 14.757         | 2585538 | 50.293       |
| 2    | 19.733         | 2555378 | 49.707       |

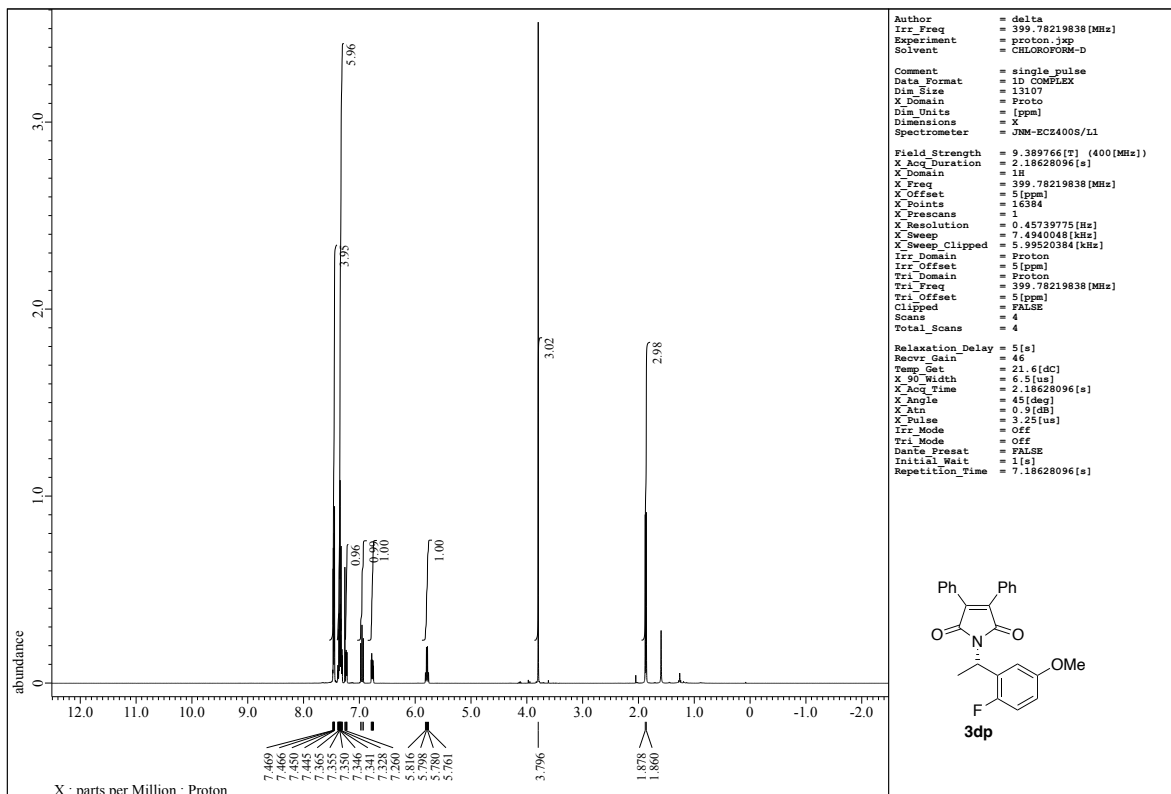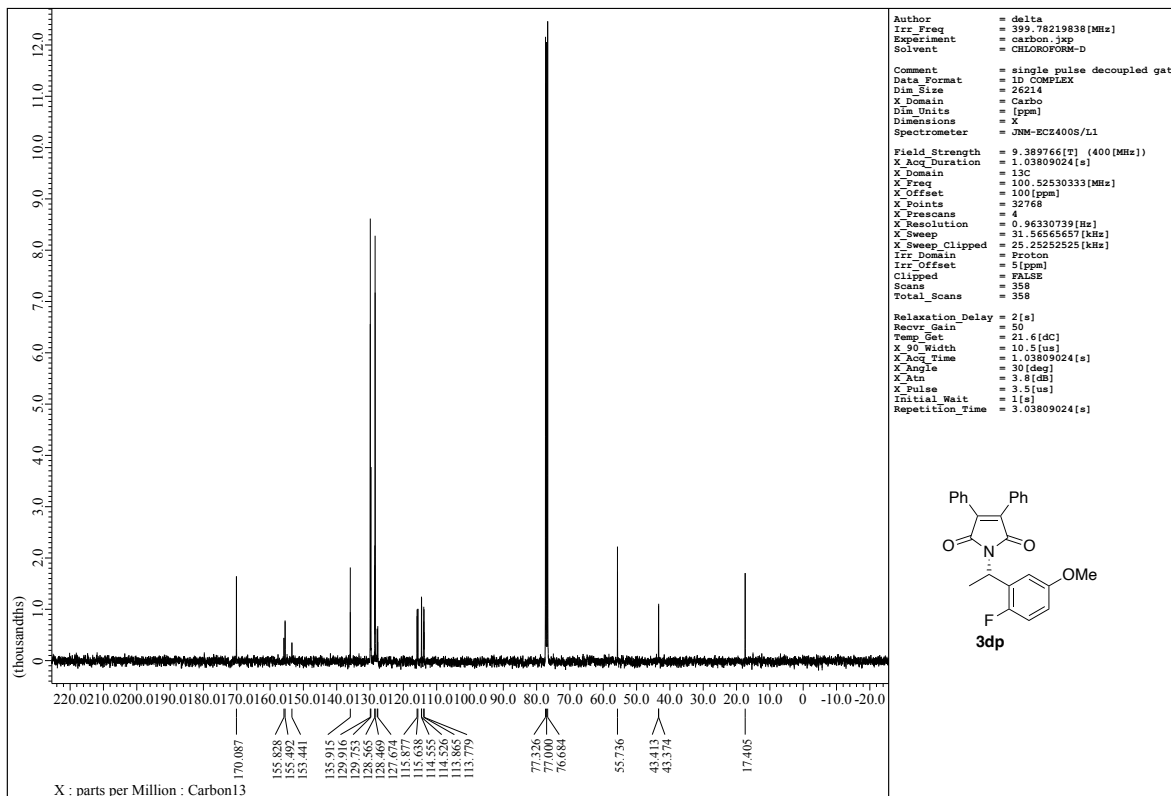

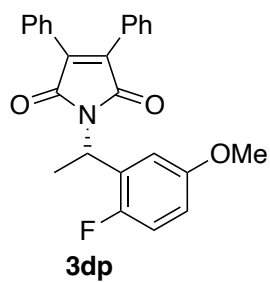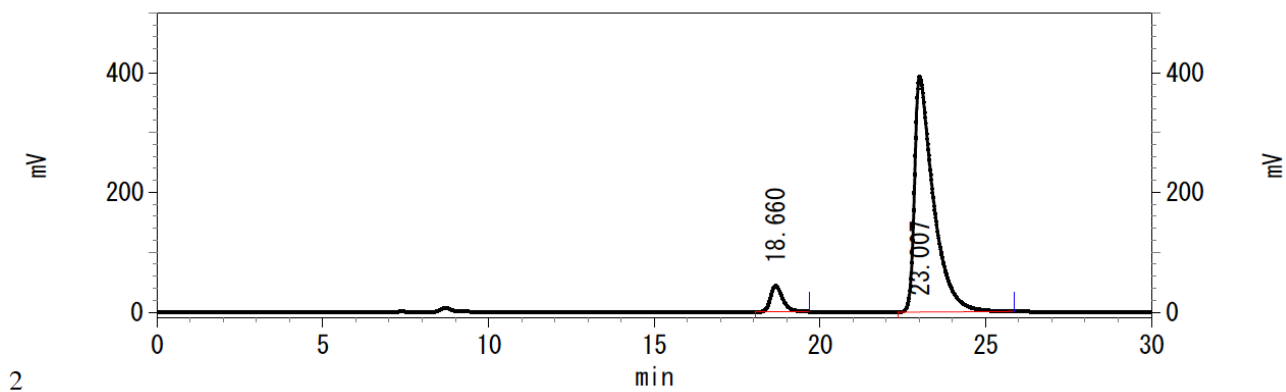

| Pk # | Retention Time | Area     | Area Percent |
|------|----------------|----------|--------------|
| 1    | 18.660         | 1115846  | 6.714        |
| 2    | 23.007         | 15502725 | 93.286       |

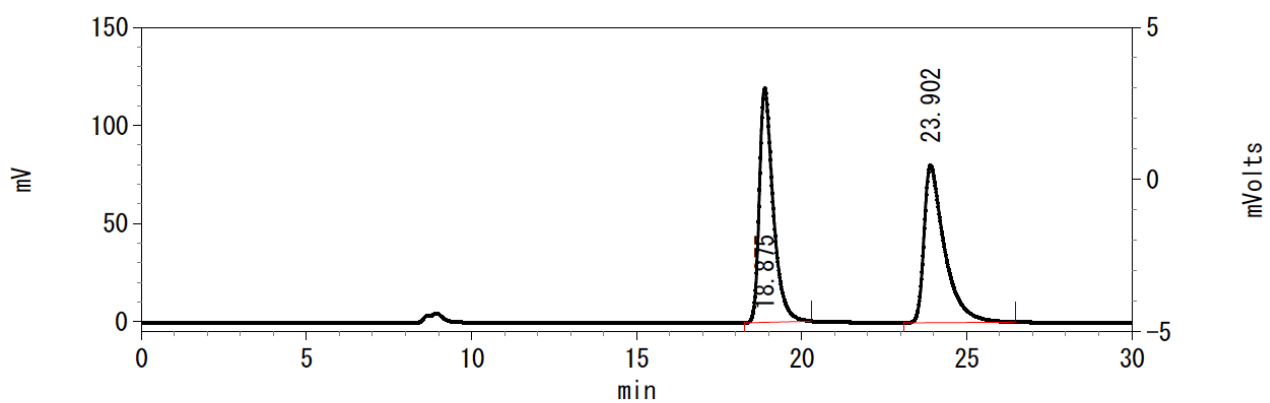

| Pk # | Retention Time | Area    | Area Percent |
|------|----------------|---------|--------------|
| 1    | 18.875         | 3474653 | 50.147       |
| 2    | 23.902         | 3454237 | 49.853       |

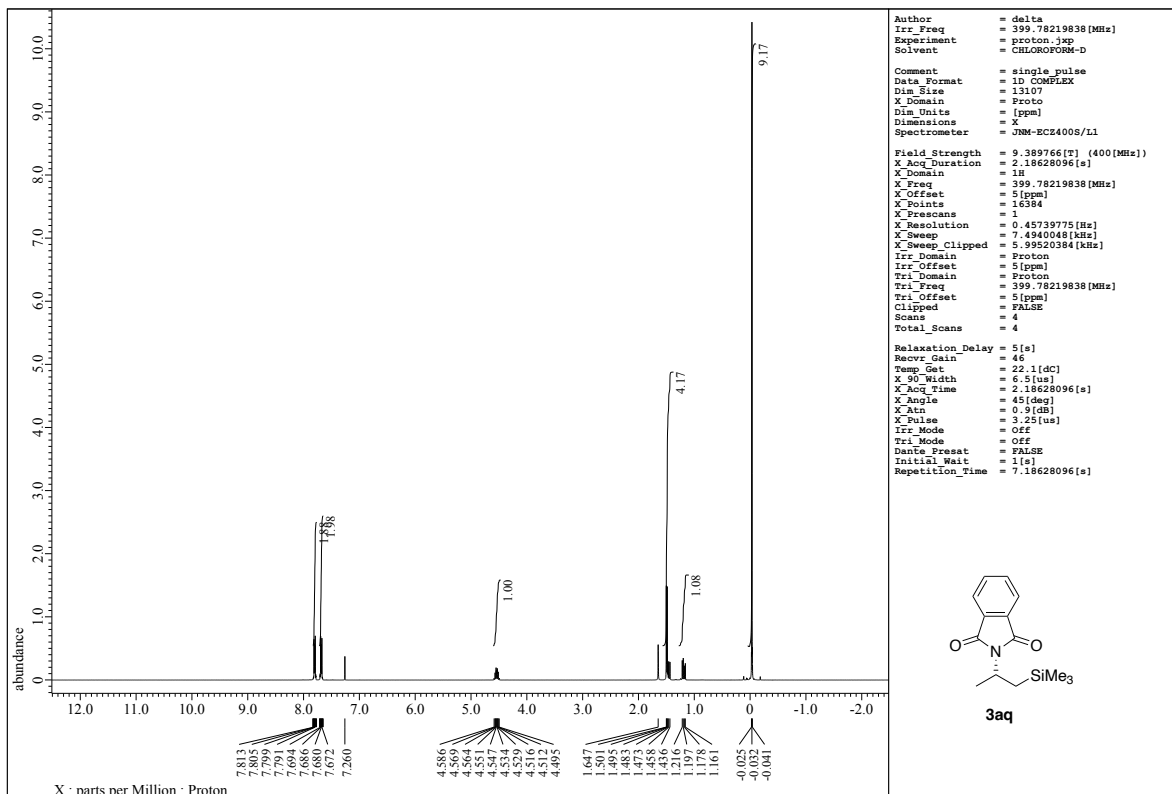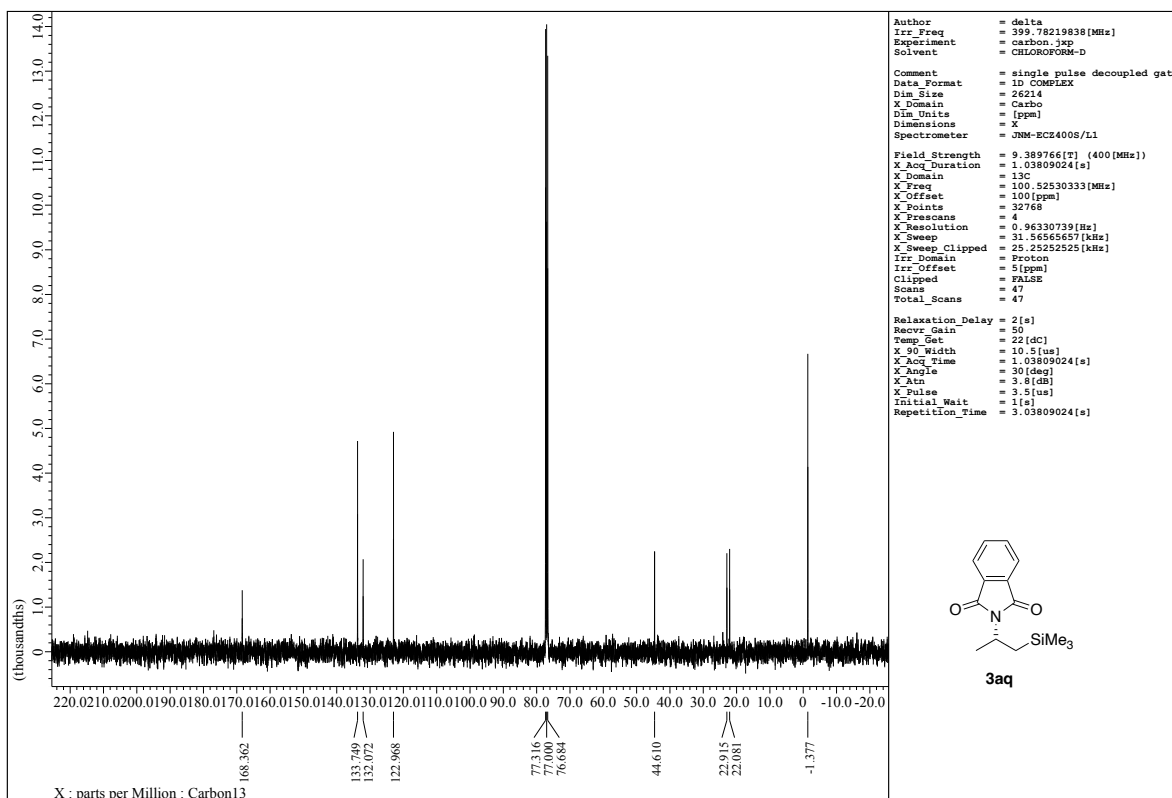

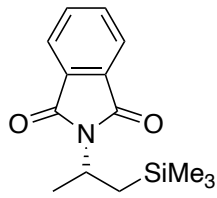

**3aq**

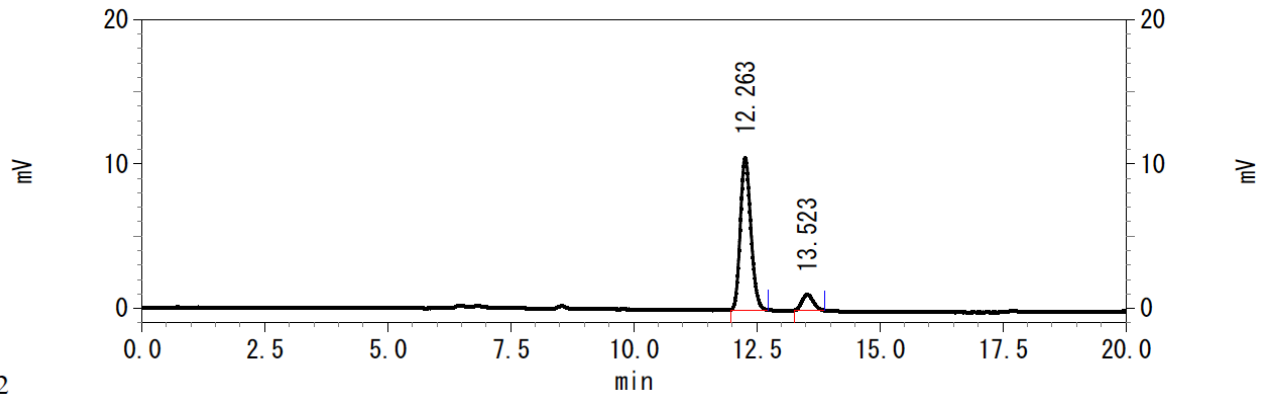

2

| Pk # | Retention Time | Area   | Area Percent |
|------|----------------|--------|--------------|
| 1    | 12.263         | 156755 | 90.035       |
| 2    | 13.523         | 17349  | 9.965        |

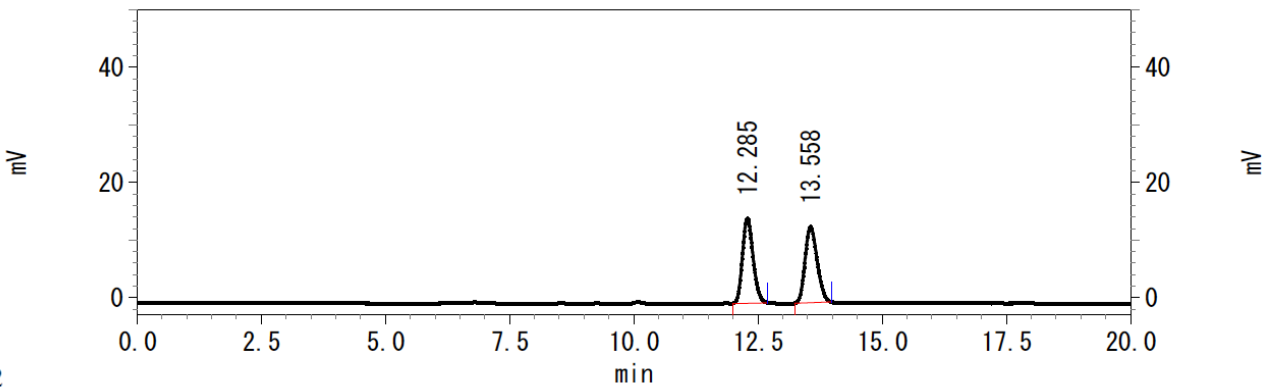

2

| Pk # | Retention Time | Area   | Area Percent |
|------|----------------|--------|--------------|
| 1    | 12.285         | 220166 | 49.618       |
| 2    | 13.558         | 223556 | 50.382       |

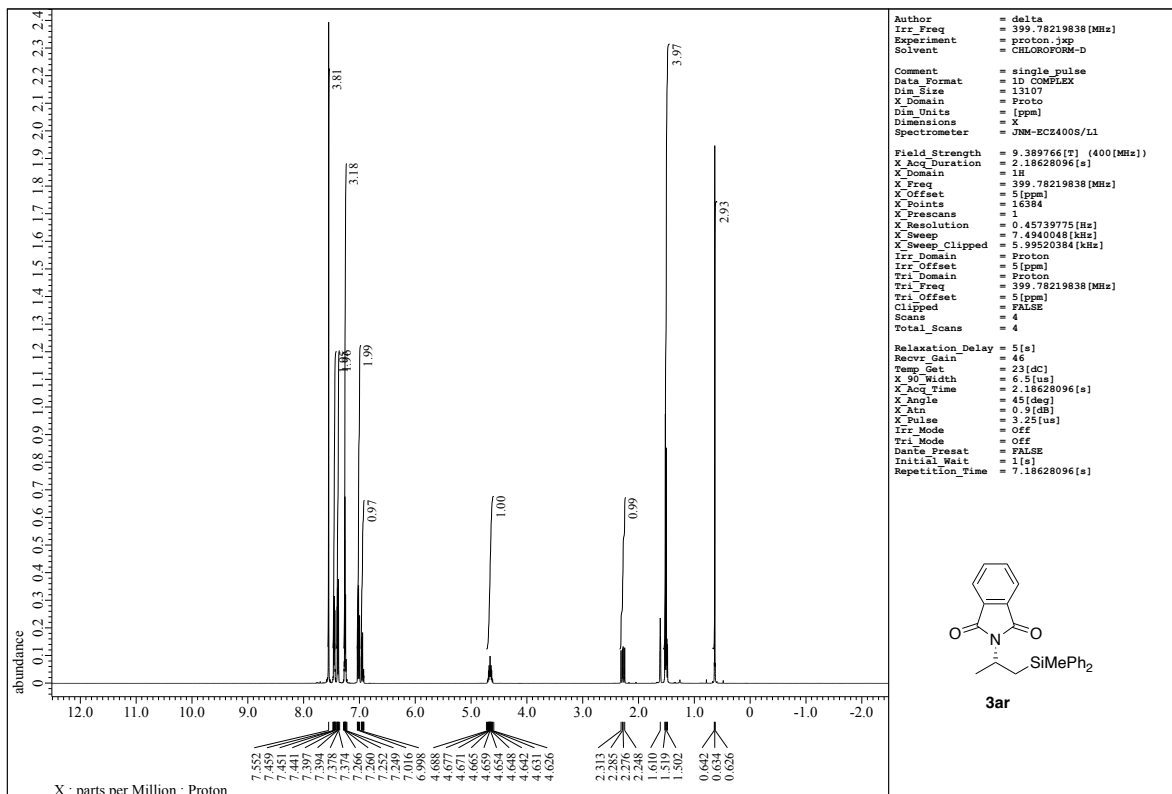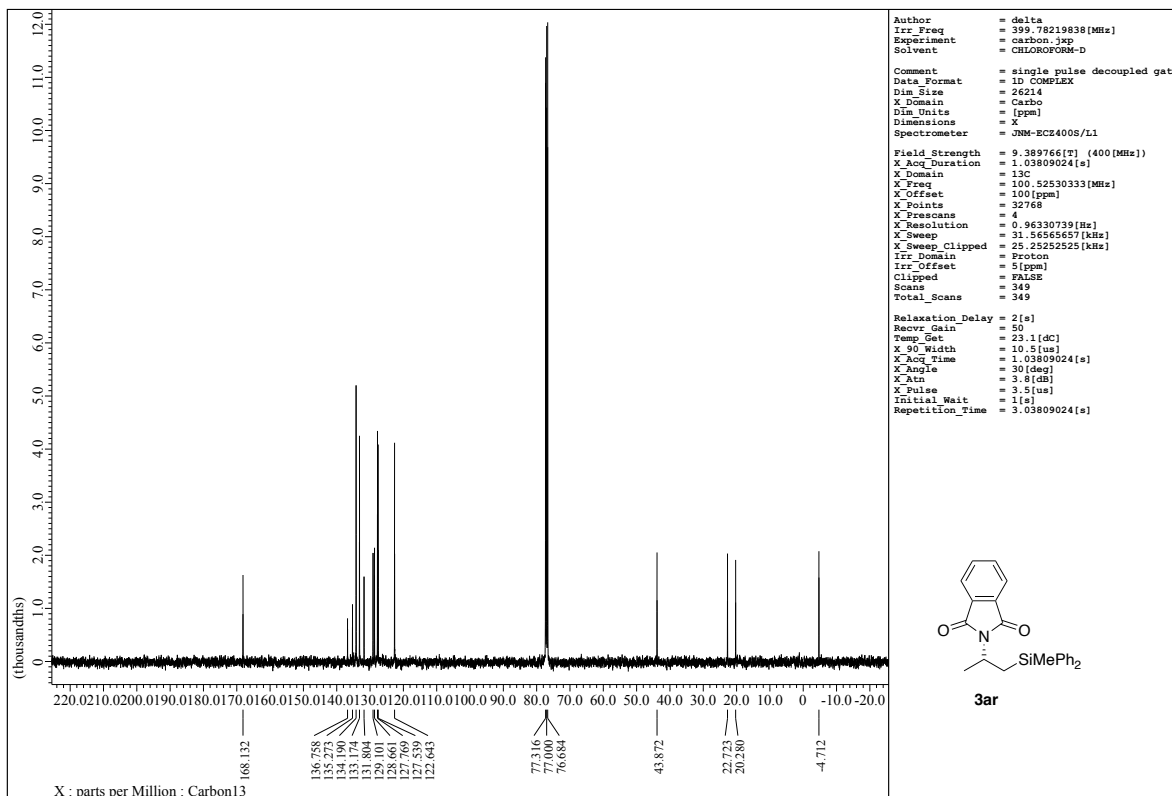

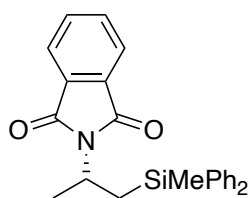

**3ar**

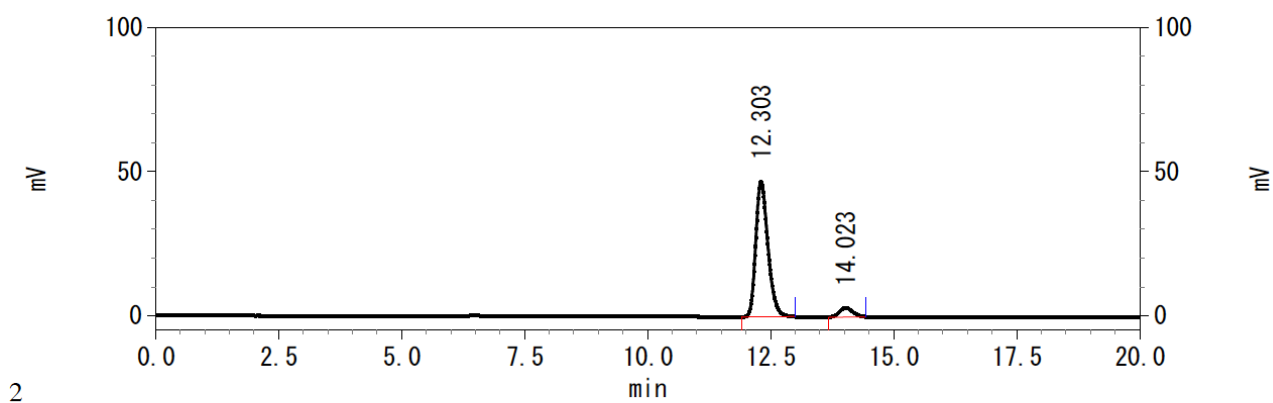

2

| Pk # | Retention Time | Area   | Area Percent |
|------|----------------|--------|--------------|
| 1    | 12.303         | 805172 | 93.023       |
| 2    | 14.023         | 60386  | 6.977        |

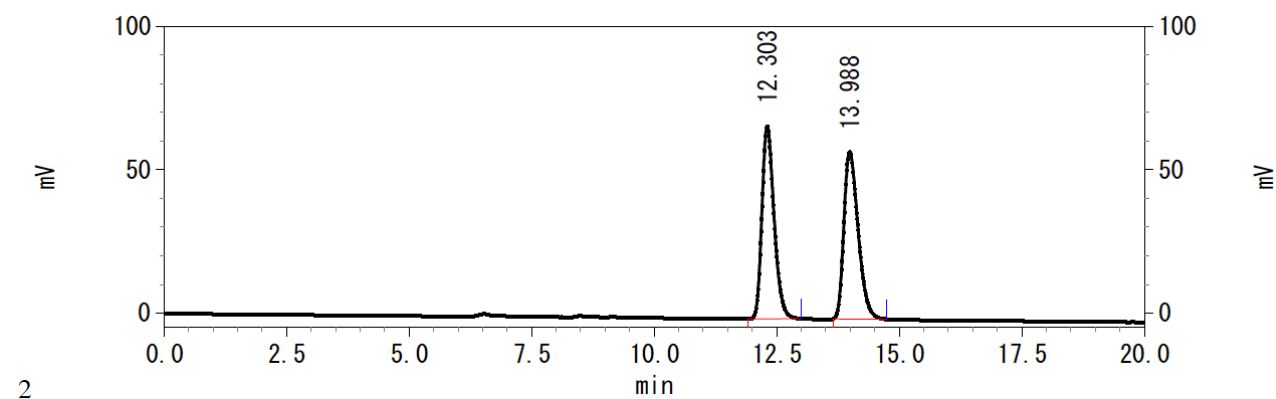

2

| Pk # | Retention Time | Area    | Area Percent |
|------|----------------|---------|--------------|
| 1    | 12.303         | 1159921 | 49.550       |
| 2    | 13.988         | 1180994 | 50.450       |





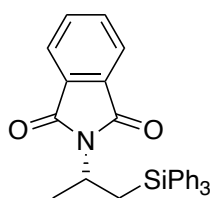

**3as**

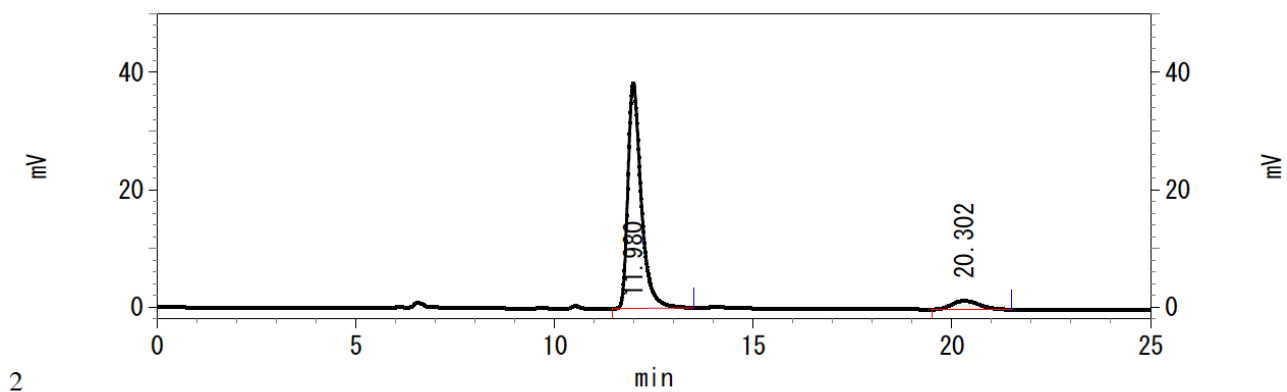

2

| Pk # | Retention Time | Area   | Area Percent |
|------|----------------|--------|--------------|
| 1    | 11.980         | 890054 | 92.531       |
| 2    | 20.302         | 71845  | 7.469        |

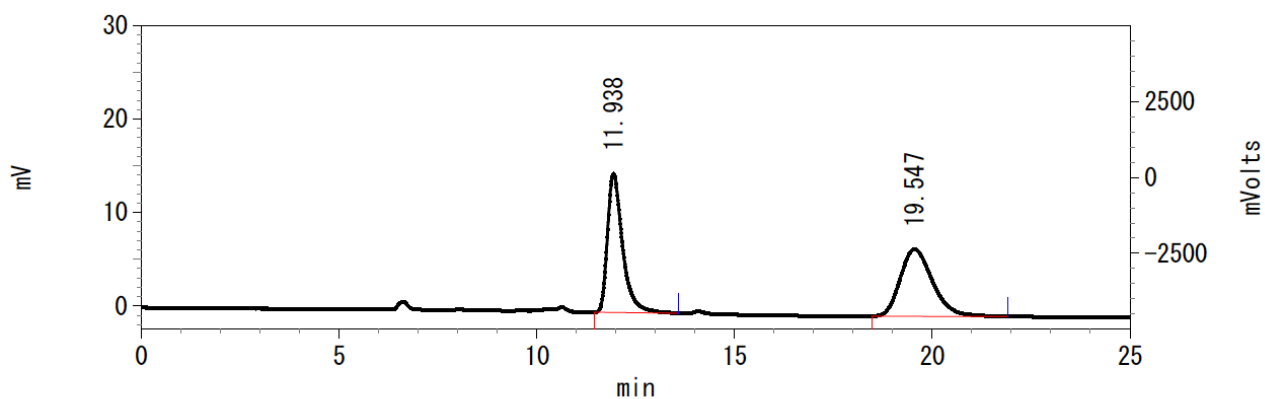

| Pk # | Retention Time | Area   | Area Percent |
|------|----------------|--------|--------------|
| 1    | 11.938         | 394973 | 49.203       |
| 2    | 19.547         | 407767 | 50.797       |



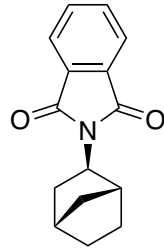

**3at**

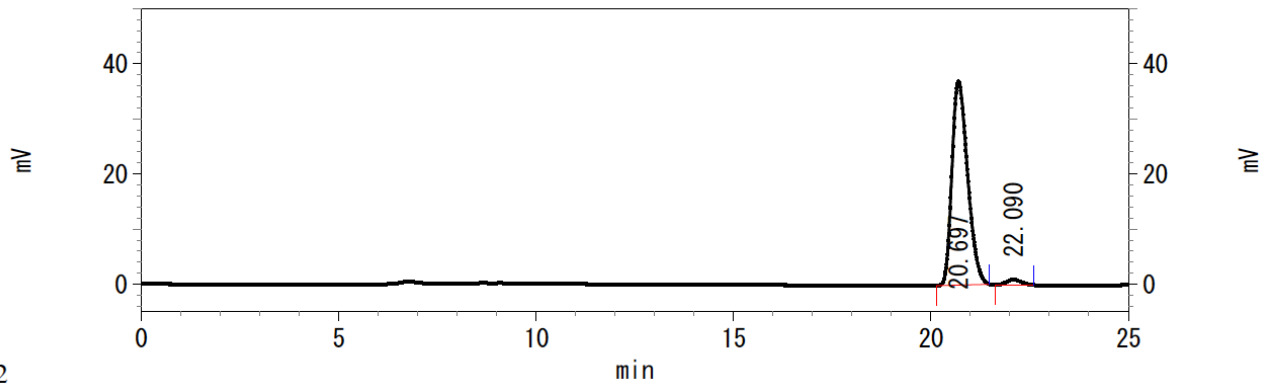

2

| Pk # | Retention Time | Area    | Area Percent |
|------|----------------|---------|--------------|
| 1    | 20.697         | 1020326 | 97.553       |
| 2    | 22.090         | 25592   | 2.447        |

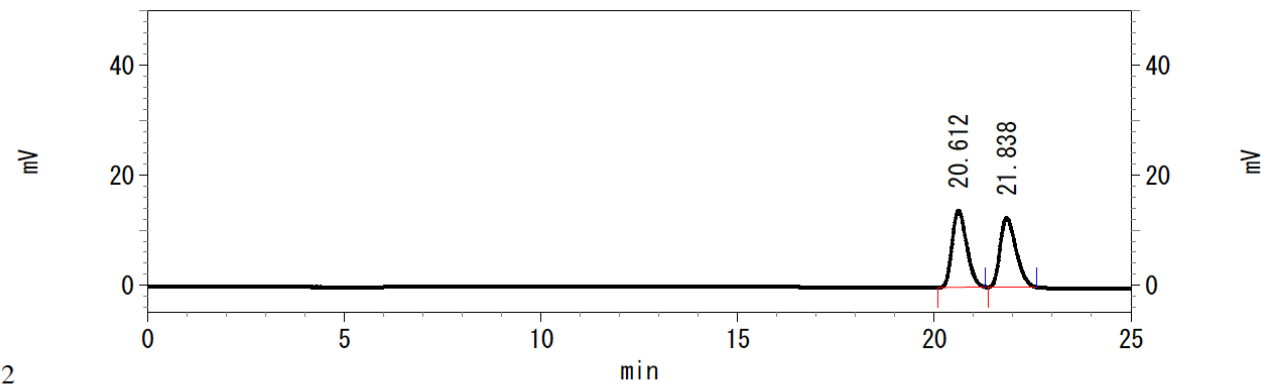

2

| Pk # | Retention Time | Area   | Area Percent |
|------|----------------|--------|--------------|
| 1    | 20.612         | 360321 | 50.296       |
| 2    | 21.838         | 356075 | 49.704       |

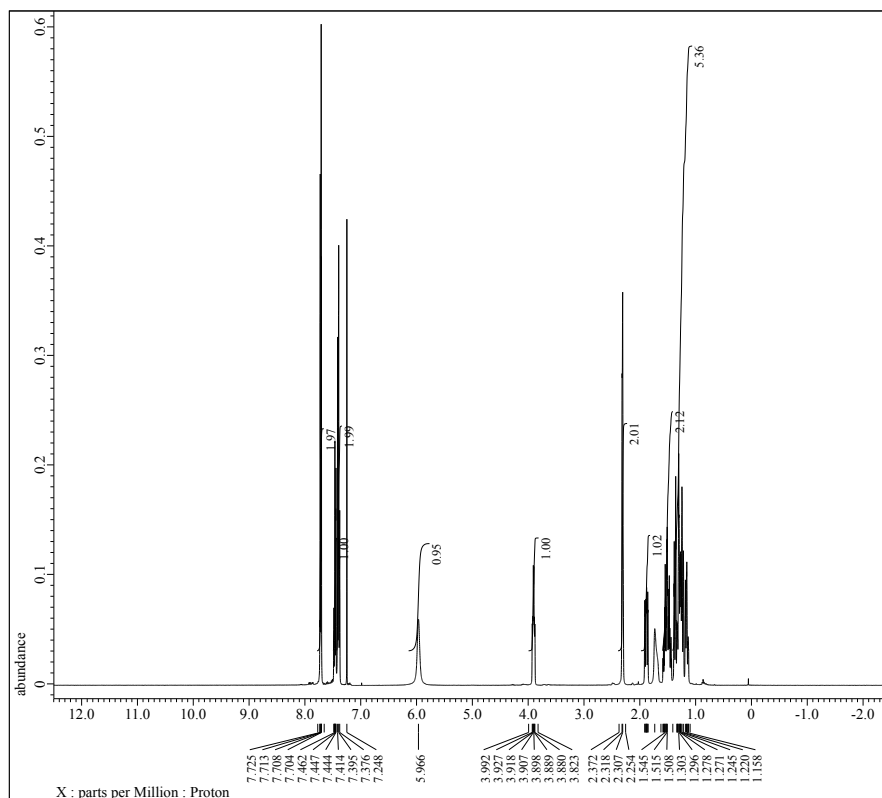

```

Author          = delta
Irr_Freq        = 399.78219838[MHz]
Experiment      = proton_3kp
Solvent         = CHLOROFORM-D
Comment        = single pulse
Data Format     = 1D COMPLEX
Dim_Size       = 13107
X_Domain       = Proton
Dim_Units      = [ppm]
Dimensions     = X
Spectrometer    = JNM-EC2400S/L1

Field_Strength = 9.389766[T] (400[MHz])
X_Acq_Duration = 2.18628096[s]
X_Domain       = 1H
X_Freq         = 399.78219838[MHz]
X_Offset       = 5[ppm]
X_Points       = 16384
X_Prescans     = 1
X_Resolution   = 0.45739775[Hz]
X_Sweep        = 7.49400481[KHz]
X_Sweep_Clipped = 5.99520384[KHz]
Irr_Domain     = Proton
Irr_Offset     = 5[ppm]
Tri_Domain     = Proton
Tri_Freq       = 399.78219838[MHz]
Tri_Offset     = 5[ppm]
Clipped        = FALSE
Scans          = 16
Total_Scans    = 16

Relaxation_Delay = 5[s]
Recvr_Gain       = 46
Temp_Get         = 21.7[dc]
X_90_Width      = 6.3[us]
X_Acq_Time      = 2.18628096[s]
X_Angle         = 45[deg]
X_Pwr           = 0.3[dB]
X_Pulse         = 3.25[us]
Irr_Mode        = Off
Tri_Mode        = Off
Dante_Preset    = FALSE
Initial_Wait    = 1[s]
Repetition_Time = 7.18628096[s]

```

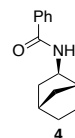

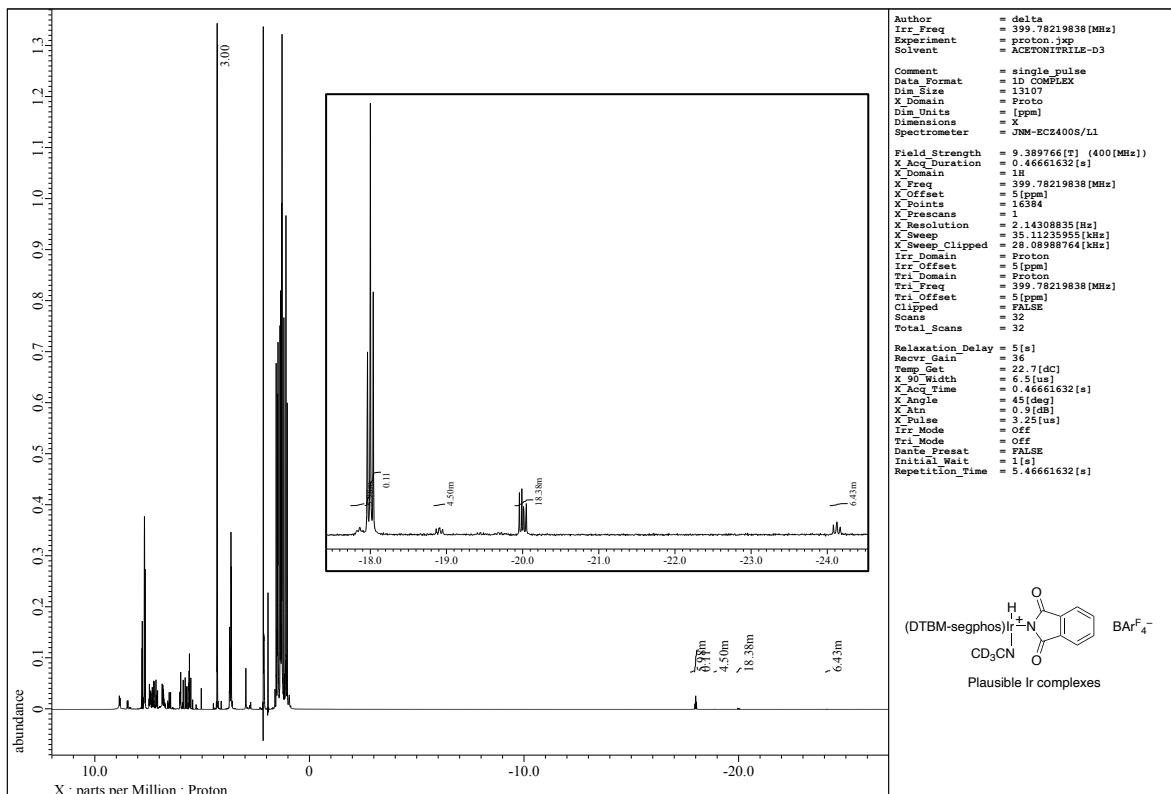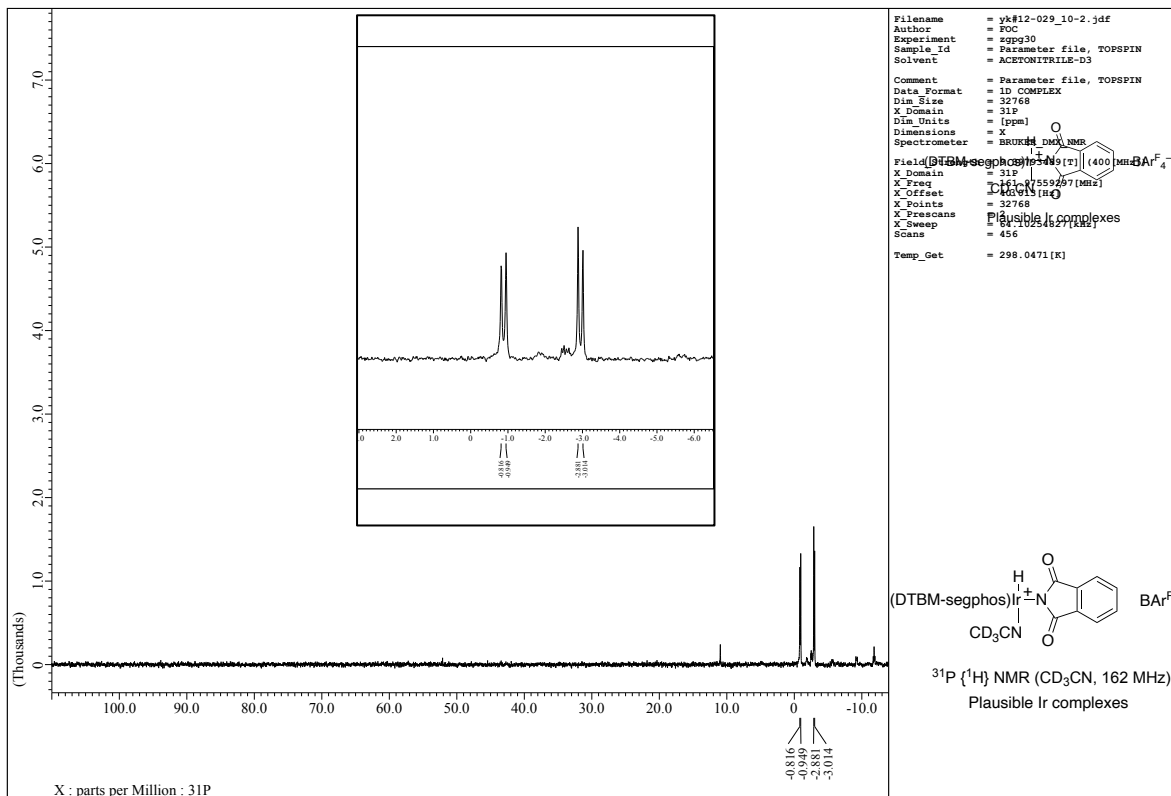

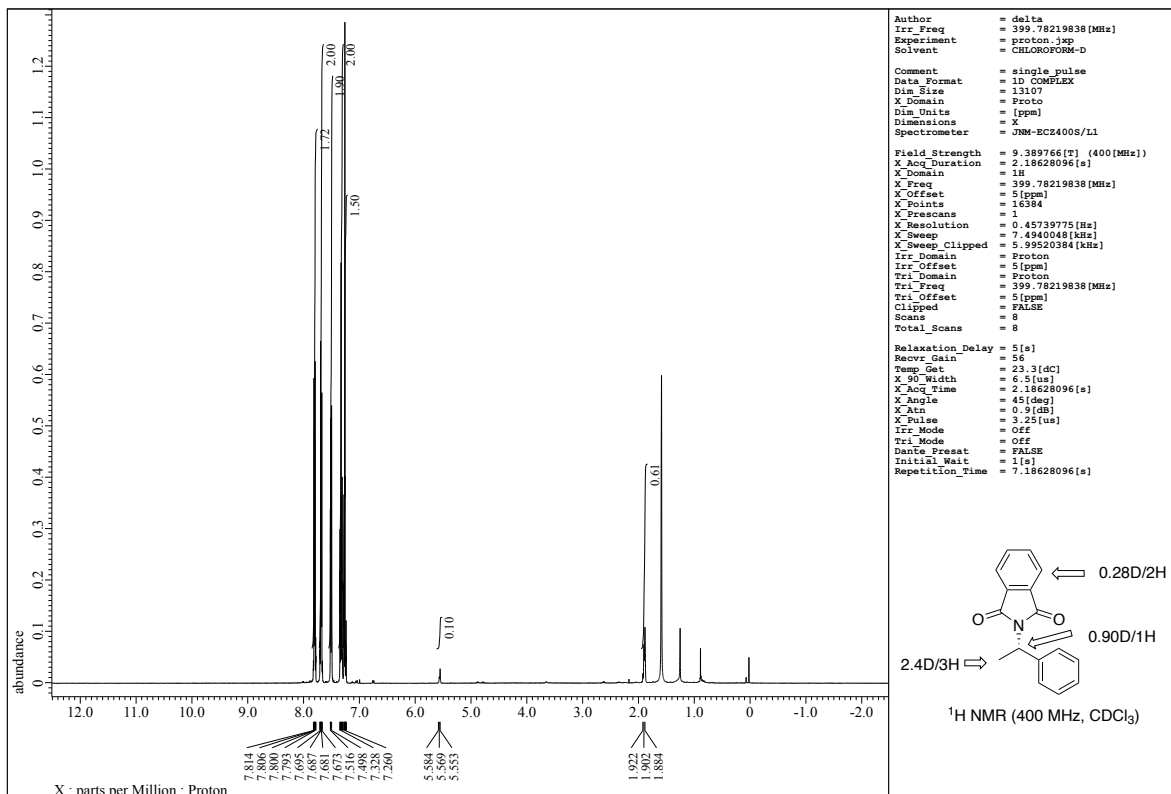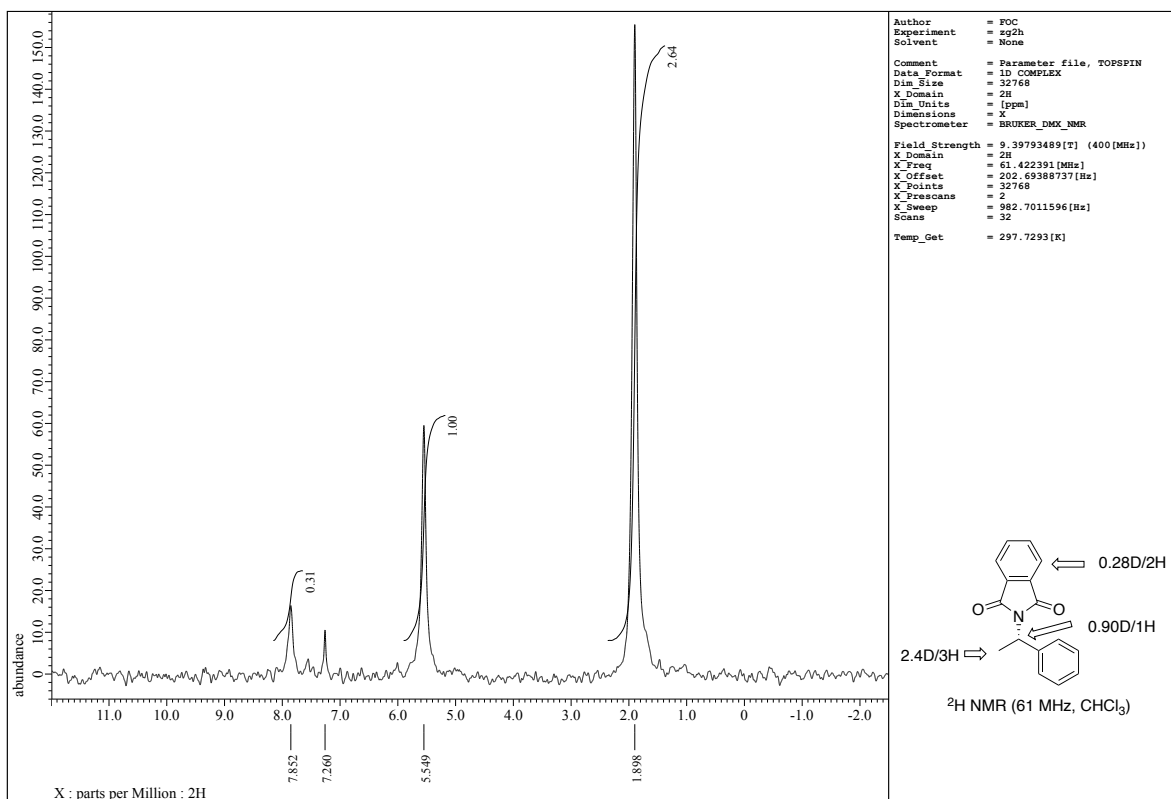

Supplement: d3cc04406h1.pdf [file d3cc04406h1.pdf]
